# Supplementary material for: MafA Expression Preserves Immune Homeostasis in Human and Mouse Islets
Source: PubMed Central journal article supplement (PMC6315686; doi:10.3390/genes9120644), 2018-12-18
Supplement: genes-09-00644-s001.pdf [file genes-09-00644-s001.pdf]

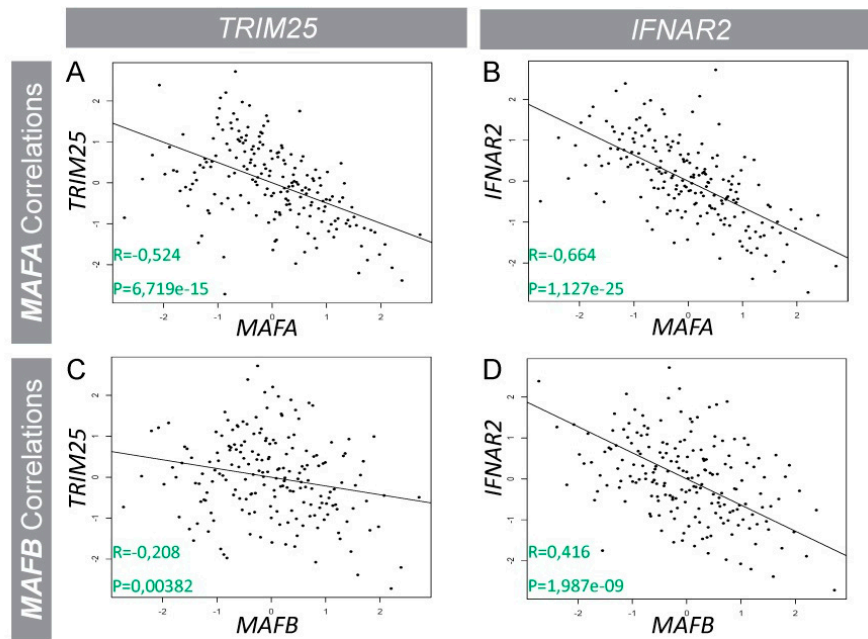

Figure S1: *MAFA* and *MAFB* are negatively correlated with IFI genes. (A–D) Individual correlations of (A,B) *MAFA* and (C,D) *MAFB* with *TRIM25* and *IFNAR2*. (A–D) Spearman correlations (R) and *p*-values are indicated in the respective plots.

Table S1: Quantitative PCR primer sequences. Primer sequences of all genes used in the quantitative PCR experiments.

| Gene primer sequences used in quantitative PCR reactions |                                 |                               |
|----------------------------------------------------------|---------------------------------|-------------------------------|
| Gene                                                     | Forward primer                  | Reverse primer                |
| Housekeeping genes                                       |                                 |                               |
| <i>HPRT</i>                                              | 5'-AGCCCCAAAATGGTTAAGGT-3'      | 5'-CAAGGGCATATCCAACAACA-3'    |
| <i>Actin-β</i>                                           | 5'-GCTTCTTTGCAGCTCCTTCGTTG-3'   | 5'-TTTGCACATGCCGGAGCCGTTGT-3' |
| <i>TBP</i>                                               | 5'-CTACCGTGAATCTTGGCTGTAA-3'    | 5'-GTTGTCCGTGGCTCTCTTATT-3'   |
| <i>PPIA</i>                                              | 5'-GTGGTCTTTGGGAAGGTGAA-3'      | 5'-CAGTCGAAATGGTGATCTTCT-3'   |
| Cytokine genes                                           |                                 |                               |
| <i>Ifnβ1</i>                                             | 5'-CACAGCCCTCTCCATCAACT-3'      | 5'-TCCCACGTCAATCTTTCCTC-3'    |
| <i>Ifna</i>                                              | 5'-AGTGAGGTGACCCAGCAGAT-3'      | 5'-CAGGGGCTGTGTTTCTTCTC-3'    |
| <i>Tnf</i>                                               | 5'-CAGGCGGTGCCTATGTCTC-3'       | 5'-CGATCACCCCGAAGTTCAGTA-3'   |
| <i>IL6</i>                                               | 5'-CTGCAAGAGACTTCCATCCAG-3'     | 5'-AGTGGTATAGACAGGTCTGTT-3'   |
| <i>Cxcl10</i>                                            | 5'-GAGCAGAGATGTCTGAATCCG-3'     | 5'-TGTGCGTGGCTTCACTC-3'       |
| Anti-viral genes                                         |                                 |                               |
| <i>Mda5</i>                                              | 5'-GTGCCAATCTTGATGCCTTTAC-3'    | 5'-CTCTGGTGTATCAGCAATCA-3'    |
| <i>Rig1</i>                                              | 5'-CTGACATTCGAGTGGTTGAGA-3'     | 5'-TGGTTTAGGGTGTGGCTTAC-3'    |
| Coxsackie and adenoviral receptor gene                   |                                 |                               |
| <i>CAR</i>                                               | 5'-TGATAACCAGATAGTGGATCAAGTG-3' | 5'-TTTATAGATGCGTCGCCAGAC-3'   |

Tables S2 and S3: Genes list from PathCards pathway unification database. Tables present gene lists from IFN and anti-viral signaling (Table S2A), cytokine and SOCS signaling (Table S2B), T1D susceptibility genes (Table S3A), and T2D susceptibility genes (Table S3B) with their respective *MAFA* and *MAFB* gene correlation (GC) and *p*-values.

Table S2A

***MAFA* and *MAFB* co-expression correlations with genes involved in IFN response and anti-viral signaling**

| Gene name | GeneID          | <i>MAFA</i> _GC | <i>P</i> -value      | <i>MAFB</i> _GC | <i>P</i> -value      |
|-----------|-----------------|-----------------|----------------------|-----------------|----------------------|
| ADAR      | ENSG00000160710 | <b>-0,48</b>    | 2.5866477004417e-12  | <b>0,27</b>     | 0.000128472739365877 |
| AFAP1     | ENSG00000196526 | <b>-0,22</b>    | 0.00254180989078645  | <b>-0,27</b>    | 0.000119528225769204 |
| AGER      | ENSG00000204305 | <b>0,39</b>     | 3.59588223542614e-08 | <b>-0,17</b>    | 0.0174285717422343   |
| AKT1      | ENSG00000142208 | <b>0,49</b>     | 4.07315761278472e-13 | <b>-0,12</b>    | 0.0868735039250571   |
| AKT2      | ENSG00000105221 | <b>0,49</b>     | 3.72634275580924e-13 | <b>-0,19</b>    | 0.00818748202932539  |
| AKT3      | ENSG00000117020 | <b>0,15</b>     | 0.0403729970246283   | <b>0,58</b>     | 1.18585366248312e-18 |
| APP       | ENSG00000142192 | <b>-0,47</b>    | 3.89752983276076e-12 | <b>0,16</b>     | 0.0240831635670573   |
| ATF2      | ENSG00000115966 | <b>-0,30</b>    | 3.2891616577512e-05  | <b>0,32</b>     | 8.62644875169852e-06 |
| ATG12     | ENSG00000145782 | <b>-0,64</b>    | 1.69389230749401e-23 | <b>-0,20</b>    | 0.00675881239009479  |
| ATG5      | ENSG00000057663 | <b>-0,47</b>    | 4.90127566011895e-12 | <b>-0,31</b>    | 1.11914538411058e-05 |
| AZI2      | ENSG00000163512 | <b>-0,24</b>    | 0.000980419055712147 | <b>0,09</b>     | 0.200308193683534    |
| BECN1     | ENSG00000126581 | <b>-0,60</b>    | 1.06372871425917e-19 | <b>-0,18</b>    | 0.0139385659320826   |
| BRCA1     | ENSG00000012048 | <b>-0,32</b>    | 8.04821881966992e-06 | <b>0,17</b>     | 0.0166236166214121   |
| BST2      | ENSG00000130303 | <b>0,20</b>     | 0.00654340416103118  | <b>-0,18</b>    | 0.0140068959553135   |
| CALM1     | ENSG00000198668 | <b>-0,23</b>    | 0.00171352867689847  | <b>0,47</b>     | 4.1178448492596e-12  |
| CALM2     | ENSG00000143933 | <b>-0,68</b>    | 3.47715337791891e-27 | <b>-0,21</b>    | 0.00303439391972829  |
| CALM3     | ENSG00000160014 | <b>-0,14</b>    | 0.0504772536289049   | <b>-0,04</b>    | 0.59804089178043     |
| CAMK2A    | ENSG00000070808 | <b>0,04</b>     | 0.559925961380528    | <b>0,03</b>     | 0.690815171680589    |
| CAMK2B    | ENSG00000058404 | <b>0,74</b>     | 1.32581980065863e-34 | <b>0,48</b>     | 2.01245174844293e-12 |
| CAMK2D    | ENSG00000145349 | <b>-0,07</b>    | 0.308804696441233    | <b>0,44</b>     | 1.26025680881935e-10 |
| CAMK2G    | ENSG00000148660 | <b>0,09</b>     | 0.229968443341259    | <b>0,56</b>     | 4.74561885427332e-17 |
| CASP1     | ENSG00000137752 | <b>-0,37</b>    | 1.27731924197375e-07 | <b>-0,28</b>    | 9.59804207795709e-05 |
| CASP10    | ENSG00000003400 | <b>-0,50</b>    | 1.70790007118818e-13 | <b>-0,34</b>    | 1.45270888085695e-06 |
| CASP8     | ENSG00000064012 | <b>-0,50</b>    | 2.00944932332427e-13 | <b>-0,40</b>    | 8.97088158582183e-09 |
| CBL       | ENSG00000110395 | <b>-0,55</b>    | 3.46855474788441e-16 | <b>0,05</b>     | 0.504839833517787    |
| CD14      | ENSG00000170458 | <b>0,63</b>     | 1.80968303395632e-22 | <b>0,10</b>     | 0.15297374967771     |
| CDKN1A    | ENSG00000124762 | <b>0,21</b>     | 0.00313834927732949  | <b>-0,13</b>    | 0.0807422336973029   |
| CEBPB     | ENSG00000172216 | <b>0,60</b>     | 2.9899164695653e-20  | <b>-0,17</b>    | 0.0189782157002947   |
| CHUK      | ENSG00000213341 | <b>-0,34</b>    | 1.1178268897534e-06  | <b>0,20</b>     | 0.00625863331816267  |
| CIITA     | ENSG00000179583 | <b>0,16</b>     | 0.0251925400006313   | <b>0,05</b>     | 0.454992654836226    |
| CREB1     | ENSG00000118260 | <b>-0,50</b>    | 2.03336285650518e-13 | <b>0,13</b>     | 0.0669786486565456   |
| CREBBP    | ENSG00000005339 | <b>0,21</b>     | 0.00401466401809987  | <b>-0,14</b>    | 0.0520105793553384   |
| CRK       | ENSG00000167193 | <b>-0,75</b>    | 8.05055390381393e-36 | <b>-0,30</b>    | 2.82393030151967e-05 |
| CRKL      | ENSG00000099942 | <b>-0,32</b>    | 4.76681209703592e-06 | <b>0,30</b>     | 3.16490373461747e-05 |
| CXCL10    | ENSG00000169245 | <b>-0,20</b>    | 0.00635049523593809  | <b>-0,30</b>    | 1.90252887758536e-05 |
| CXCL12    | ENSG00000107562 | <b>-0,25</b>    | 0.000383990851726459 | <b>-0,39</b>    | 2.10479387532965e-08 |
| CXCL8     | ENSG00000169429 | <b>-0,42</b>    | 1.12097774486885e-09 | <b>-0,54</b>    | 1.55144253234339e-15 |
| CXCL9     | ENSG00000138755 | <b>-0,21</b>    | 0.00288462294587905  | <b>-0,21</b>    | 0.00355173584180992  |
| CYBB      | ENSG00000165168 | <b>-0,44</b>    | 2.64750126097317e-10 | <b>-0,10</b>    | 0.162358053660834    |
| CYLD      | ENSG00000083799 | <b>-0,24</b>    | 0.000867446080372755 | <b>0,22</b>     | 0.00257779403575003  |
| DAPK1     | ENSG00000196730 | <b>-0,19</b>    | 0.0102461393968577   | <b>0,01</b>     | 0.885551992977293    |
| DDX17     | ENSG00000100201 | <b>0,02</b>     | 0.834030117120401    | <b>0,00</b>     | 0.96295952316099     |
| DDX3X     | ENSG00000215301 | <b>-0,45</b>    | 4.97326746490228e-11 | <b>-0,09</b>    | 0.194963106377314    |
| DDX3Y     | ENSG00000067048 | <b>-0,21</b>    | 0.00310636883519242  | <b>-0,05</b>    | 0.487427870641955    |
| DDX58     | ENSG00000107201 | <b>-0,42</b>    | 9.47228472906936e-10 | <b>-0,23</b>    | 0.00110291790660329  |
| DHX36     | ENSG00000174953 | <b>-0,45</b>    | 1.01826907853331e-10 | <b>0,20</b>     | 0.00500524683407353  |
| DHX58     | ENSG00000108771 | <b>0,47</b>     | 4.42466552537902e-12 | <b>-0,22</b>    | 0.00206682956848339  |

|          |                 |              |                      |              |                      |
|----------|-----------------|--------------|----------------------|--------------|----------------------|
| DHX9     | ENSG00000135829 | <b>-0,51</b> | 4.06940241394339e-14 | <b>-0,12</b> | 0.11122258089935     |
| EGR1     | ENSG00000120738 | <b>-0,14</b> | 0.0623343681152722   | <b>-0,22</b> | 0.00280085718660578  |
| EIF2AK2  | ENSG00000055332 | <b>-0,46</b> | 3.30817892243563e-11 | <b>0,15</b>  | 0.0406389192141145   |
| EIF4A1   | ENSG00000161960 | <b>-0,74</b> | 2.31419729734339e-34 | <b>-0,31</b> | 1.32143630545985e-05 |
| EIF4B    | ENSG00000063046 | <b>-0,59</b> | 1.13502892661456e-19 | <b>0,00</b>  | 0.960161084589656    |
| EIF4E    | ENSG00000151247 | <b>-0,59</b> | 2.91968333681233e-19 | <b>-0,01</b> | 0.913889836816078    |
| EIF4EBP1 | ENSG00000187840 | <b>0,40</b>  | 7.69254668744038e-09 | <b>-0,29</b> | 5.82275126060127e-05 |
| EP300    | ENSG00000100393 | <b>-0,21</b> | 0.00340861626434952  | <b>0,00</b>  | 0.990585855749299    |
| FADD     | ENSG00000168040 | <b>-0,15</b> | 0.0356583211386548   | <b>-0,22</b> | 0.00279319763901373  |
| FANCC    | ENSG00000158169 | <b>-0,15</b> | 0.0415773279297585   | <b>0,14</b>  | 0.0502005998938999   |
| FYN      | ENSG00000010810 | <b>-0,11</b> | 0.115624618811205    | <b>0,36</b>  | 4.65577043086155e-07 |
| GAB2     | ENSG00000033327 | <b>-0,34</b> | 1.31467093679976e-06 | <b>-0,07</b> | 0.367957087429214    |
| GBP1     | ENSG00000117228 | <b>-0,54</b> | 3.72749092694847e-16 | <b>-0,39</b> | 1.62642204239511e-08 |
| GBP2     | ENSG00000162645 | <b>-0,48</b> | 2.60404210434064e-12 | <b>-0,48</b> | 2.35061797063963e-12 |
| HERC5    | ENSG00000138646 | <b>0,05</b>  | 0.506459355392549    | <b>0,50</b>  | 2.87793406986351e-13 |
| HLA-A    | ENSG00000206503 | <b>0,41</b>  | 3.17676782898581e-09 | <b>0,05</b>  | 0.501993587554691    |
| HLA-B    | ENSG00000234745 | <b>-0,07</b> | 0.321245752822301    | <b>-0,37</b> | 1.35154815601213e-07 |
| HLA-C    | ENSG00000204525 | <b>0,22</b>  | 0.00177092256548731  | <b>-0,05</b> | 0.493859111819826    |
| HLA-E    | ENSG00000204592 | <b>0,16</b>  | 0.0291932833068203   | <b>-0,28</b> | 9.86111154029346e-05 |
| HLA-F    | ENSG00000204642 | <b>0,48</b>  | 3.0844601875437e-12  | <b>-0,25</b> | 0.000591139503654884 |
| HLA-G    | ENSG00000204632 | <b>0,05</b>  | 0.482261735708689    | <b>-0,31</b> | 9.9969053922563e-06  |
| HLA-H    | ENSG00000206341 | <b>0,18</b>  | 0.0140794221492256   | <b>0,09</b>  | 0.239411023029804    |
| HMGB1    | ENSG00000189403 | <b>-0,47</b> | 1.09830958412856e-11 | <b>-0,19</b> | 0.00703428082896763  |
| ICAM1    | ENSG00000090339 | <b>-0,26</b> | 0.000310326558739677 | <b>-0,38</b> | 7.74971946141322e-08 |
| IFI16    | ENSG00000163565 | <b>-0,34</b> | 1.67670760690685e-06 | <b>-0,27</b> | 0.000192580545122838 |
| IFI27    | ENSG00000165949 | <b>0,06</b>  | 0.417463327642741    | <b>-0,18</b> | 0.012460364710499    |
| IFI27L1  | ENSG00000165948 | <b>0,05</b>  | 0.510543782695452    | <b>0,25</b>  | 0.000530577354782791 |
| IFI27L2  | ENSG00000119632 | <b>0,69</b>  | 9.76574874205656e-29 | <b>0,18</b>  | 0.0117519093294205   |
| IFI30    | ENSG00000216490 | <b>0,08</b>  | 0.295313404702536    | <b>-0,12</b> | 0.110463236495231    |
| IFI35    | ENSG00000068079 | <b>0,08</b>  | 0.291372865987342    | <b>0,02</b>  | 0.766252150166224    |
| IFI44    | ENSG00000137965 | <b>-0,34</b> | 1.16965246796782e-06 | <b>-0,42</b> | 1.28196123577402e-09 |
| IFI44L   | ENSG00000137959 | <b>-0,24</b> | 0.000934117970662363 | <b>-0,27</b> | 0.000119049051259401 |
| IFI6     | ENSG00000126709 | <b>0,60</b>  | 2.28537513168798e-20 | <b>0,14</b>  | 0.0534002297273771   |
| IFIH1    | ENSG00000115267 | <b>-0,35</b> | 4.95295621421065e-07 | <b>0,19</b>  | 0.0080246166595001   |
| IFIT1    | ENSG00000185745 | <b>-0,10</b> | 0.168179329055682    | <b>0,13</b>  | 0.0790116548077697   |
| IFIT2    | ENSG00000119922 | <b>-0,39</b> | 1.81926495916762e-08 | <b>-0,37</b> | 1.77032737388667e-07 |
| IFIT3    | ENSG00000119917 | <b>-0,46</b> | 1.83893380809121e-11 | <b>-0,36</b> | 2.66527425198204e-07 |
| IFIT5    | ENSG00000152778 | <b>-0,40</b> | 1.38063670814945e-08 | <b>0,22</b>  | 0.00235545560046322  |
| IFITM1   | ENSG00000185885 | <b>-0,12</b> | 0.0868732507529924   | <b>-0,10</b> | 0.182545759924403    |
| IFITM10  | ENSG00000244242 | <b>0,29</b>  | 5.56725742440848e-05 | <b>-0,16</b> | 0.0243587877409559   |
| IFITM2   | ENSG00000185201 | <b>-0,08</b> | 0.259989669232281    | <b>-0,40</b> | 6.3595868417778e-09  |
| IFITM3   | ENSG00000142089 | <b>0,18</b>  | 0.0128806254229862   | <b>-0,45</b> | 4.72199476985729e-11 |
| IFNA20P  | ENSG00000226393 | <b>0,21</b>  | 0.00416376696711289  | <b>-0,04</b> | 0.538358637859135    |
| IFNAR1   | ENSG00000142166 | <b>-0,63</b> | 1.93927974544317e-22 | <b>-0,26</b> | 0.000304375990188567 |
| IFNAR2   | ENSG00000159110 | <b>-0,66</b> | 1.12799580148387e-25 | <b>-0,42</b> | 1.9875301607214e-09  |
| IFNGR1   | ENSG00000027697 | <b>-0,61</b> | 9.20222557434055e-21 | <b>-0,47</b> | 6.89646309761597e-12 |
| IFNGR2   | ENSG00000159128 | <b>-0,51</b> | 2.75065468913454e-14 | <b>-0,54</b> | 4.3989143154181e-16  |
| IFNLR1   | ENSG00000185436 | <b>-0,31</b> | 1.556330238438e-05   | <b>-0,13</b> | 0.0754043913196151   |
| IKBKB    | ENSG00000104365 | <b>0,00</b>  | 0.955333101431861    | <b>-0,29</b> | 6.32388919004456e-05 |
| IL10     | ENSG00000136634 | <b>-0,35</b> | 6.62961598191475e-07 | <b>-0,14</b> | 0.0481751827565998   |
| IL12A    | ENSG00000168811 | <b>0,00</b>  | 0.991110726408829    | <b>-0,38</b> | 7.9570963243035e-08  |
| IL15     | ENSG00000164136 | <b>-0,22</b> | 0.00267988795387774  | <b>-0,70</b> | 6.9321397775139e-29  |
| IL16     | ENSG00000172349 | <b>-0,06</b> | 0.424249139118085    | <b>-0,01</b> | 0.857373004345726    |
| IL18     | ENSG00000150782 | <b>-0,27</b> | 0.000193778534666499 | <b>-0,32</b> | 4.62993766015631e-06 |
| IL1A     | ENSG00000115008 | <b>-0,32</b> | 8.45224131569533e-06 | <b>-0,30</b> | 2.66784939150809e-05 |
| IL1B     | ENSG00000125538 | <b>-0,35</b> | 7.39860946753494e-07 | <b>-0,35</b> | 8.80488246544108e-07 |
| IL33     | ENSG00000137033 | <b>-0,39</b> | 3.03371256792028e-08 | <b>-0,42</b> | 9.27237350542814e-10 |
| IL6      | ENSG00000136244 | <b>-0,38</b> | 6.23851661010328e-08 | <b>-0,54</b> | 1.04547716421021e-15 |

|         |                 |              |                      |              |                      |
|---------|-----------------|--------------|----------------------|--------------|----------------------|
| IP6K2   | ENSG00000068745 | <b>0,30</b>  | 2.25135147047044e-05 | <b>0,07</b>  | 0.324641430677502    |
| IRF1    | ENSG00000125347 | <b>-0,22</b> | 0.00218498430516907  | <b>-0,45</b> | 6.8595246836266e-11  |
| IRF2    | ENSG00000168310 | <b>-0,53</b> | 2.64551578741172e-15 | <b>-0,12</b> | 0.0860556588295567   |
| IRF3    | ENSG00000126456 | <b>0,62</b>  | 1.55820327947092e-21 | <b>-0,13</b> | 0.0674161842953076   |
| IRF4    | ENSG00000137265 | <b>-0,37</b> | 1.1784521145191e-07  | <b>-0,50</b> | 3.2774625407313e-13  |
| IRF5    | ENSG00000128604 | <b>0,52</b>  | 6.57680600283766e-15 | <b>-0,13</b> | 0.0848245154461347   |
| IRF6    | ENSG00000117595 | <b>-0,56</b> | 4.31345058997722e-17 | <b>0,07</b>  | 0.317195808715754    |
| IRF7    | ENSG00000185507 | <b>0,66</b>  | 2.2146313704963e-25  | <b>-0,12</b> | 0.108319133878486    |
| IRF8    | ENSG00000140968 | <b>-0,17</b> | 0.0189482704504927   | <b>-0,20</b> | 0.00606151359148182  |
| IRF9    | ENSG00000213928 | <b>-0,01</b> | 0.927355270888246    | <b>-0,11</b> | 0.13027341850353     |
| IRS1    | ENSG00000169047 | <b>0,19</b>  | 0.00779396677946712  | <b>-0,36</b> | 2.89957043440865e-07 |
| IRS2    | ENSG00000185950 | <b>0,26</b>  | 0.000226329855985828 | <b>0,23</b>  | 0.00164737210953704  |
| ISG15   | ENSG00000187608 | <b>0,61</b>  | 3.31669997958626e-21 | <b>-0,13</b> | 0.0836352099427672   |
| ISG20   | ENSG00000172183 | <b>0,40</b>  | 1.36808822637563e-08 | <b>-0,27</b> | 0.000146216702121402 |
| ITCH    | ENSG00000078747 | <b>-0,60</b> | 4.22823020929935e-20 | <b>0,00</b>  | 0.995443777689389    |
| ITPR1   | ENSG00000150995 | <b>-0,19</b> | 0.00737111439320625  | <b>0,36</b>  | 2.55509115938012e-07 |
| ITPR2   | ENSG00000123104 | <b>-0,43</b> | 3.87773800527843e-10 | <b>-0,02</b> | 0.777396709371253    |
| ITPR3   | ENSG00000096433 | <b>0,52</b>  | 1.4137230967383e-14  | <b>0,03</b>  | 0.644539315465679    |
| JAK1    | ENSG00000162434 | <b>-0,52</b> | 1.21965899014069e-14 | <b>-0,17</b> | 0.0181285138677532   |
| JAK2    | ENSG00000096968 | <b>-0,21</b> | 0.00293620050676593  | <b>0,31</b>  | 1.15950395778076e-05 |
| LCK     | ENSG00000182866 | <b>-0,15</b> | 0.0353462625797426   | <b>-0,23</b> | 0.00136232130345569  |
| LY96    | ENSG00000154589 | <b>-0,22</b> | 0.00195846263185404  | <b>-0,13</b> | 0.0753037824128098   |
| MAP2K1  | ENSG00000169032 | <b>-0,42</b> | 1.0089549299884e-09  | <b>-0,13</b> | 0.0641132819324937   |
| MAP2K3  | ENSG00000034152 | <b>0,31</b>  | 1.74885548526188e-05 | <b>-0,30</b> | 2.24391426857431e-05 |
| MAP2K6  | ENSG00000108984 | <b>-0,40</b> | 1.53752344947262e-08 | <b>0,19</b>  | 0.00843758230584174  |
| MAP3K1  | ENSG00000095015 | <b>-0,59</b> | 2.14954752454161e-19 | <b>-0,38</b> | 5.75968519951562e-08 |
| MAP3K11 | ENSG00000173327 | <b>0,64</b>  | 3.91960507895763e-23 | <b>-0,08</b> | 0.276514101965175    |
| MAP3K4  | ENSG00000085511 | <b>-0,31</b> | 1.25307634064807e-05 | <b>0,26</b>  | 0.000275213929728696 |
| MAP3K7  | ENSG00000135341 | <b>-0,35</b> | 6.39003437413233e-07 | <b>-0,01</b> | 0.867092351786451    |
| MAPK1   | ENSG00000100030 | <b>-0,60</b> | 2.99200936810869e-20 | <b>0,08</b>  | 0.251282465884628    |
| MAPK10  | ENSG00000109339 | <b>0,00</b>  | 0.962978066789964    | <b>0,63</b>  | 1.24976684735071e-22 |
| MAPK11  | ENSG00000185386 | <b>0,64</b>  | 1.33530520718186e-23 | <b>0,08</b>  | 0.268922126268205    |
| MAPK12  | ENSG00000188130 | <b>0,70</b>  | 3.25251537512553e-29 | <b>0,02</b>  | 0.772127715624114    |
| MAPK13  | ENSG00000156711 | <b>0,42</b>  | 2.1806270771068e-09  | <b>0,09</b>  | 0.206238498899922    |
| MAPK14  | ENSG00000112062 | <b>-0,44</b> | 1.17566206635571e-10 | <b>0,05</b>  | 0.507090038075621    |
| MAPK3   | ENSG00000102882 | <b>0,36</b>  | 2.87917061872028e-07 | <b>0,30</b>  | 2.0009180219269e-05  |
| MAPK8   | ENSG00000107643 | <b>-0,56</b> | 2.23804290203971e-17 | <b>-0,30</b> | 1.96903338705634e-05 |
| MAPK9   | ENSG00000050748 | <b>-0,46</b> | 1.64214884535091e-11 | <b>0,20</b>  | 0.00516805948761377  |
| MAPKAP1 | ENSG00000119487 | <b>-0,41</b> | 2.42341639458969e-09 | <b>-0,41</b> | 5.9112783825463e-09  |
| MAVS    | ENSG00000088888 | <b>0,04</b>  | 0.579983207901823    | <b>0,02</b>  | 0.83104014829524     |
| MCM5    | ENSG00000100297 | <b>0,25</b>  | 0.000389994148458065 | <b>-0,21</b> | 0.00307861805674677  |
| MLST8   | ENSG00000167965 | <b>0,70</b>  | 6.58810809014195e-30 | <b>0,05</b>  | 0.49115449048096     |
| MTOR    | ENSG00000198793 | <b>-0,46</b> | 1.39801399115379e-11 | <b>0,03</b>  | 0.700528947537056    |
| MX1     | ENSG00000157601 | <b>-0,18</b> | 0.015182873912748    | <b>-0,26</b> | 0.000298574134706061 |
| MX2     | ENSG00000183486 | <b>-0,20</b> | 0.00461039956638195  | <b>-0,20</b> | 0.0065061668848554   |
| MYC     | ENSG00000136997 | <b>-0,17</b> | 0.0168645538571789   | <b>-0,49</b> | 3.93334794486251e-13 |
| MYD88   | ENSG00000172936 | <b>-0,63</b> | 1.30792485750974e-22 | <b>-0,47</b> | 7.90972736361841e-12 |
| NFKB1   | ENSG00000109320 | <b>-0,59</b> | 1.41337345847154e-19 | <b>-0,40</b> | 1.27178951836757e-08 |
| NFKB2   | ENSG00000077150 | <b>0,22</b>  | 0.00270211457539767  | <b>-0,42</b> | 1.95754158193685e-09 |
| NFKBIA  | ENSG00000100906 | <b>-0,22</b> | 0.00228519241789342  | <b>-0,59</b> | 5.63470401469128e-19 |
| NFKBIB  | ENSG00000104825 | <b>0,39</b>  | 3.51981854643213e-08 | <b>-0,19</b> | 0.00737618848454116  |
| NFKBIE  | ENSG00000146232 | <b>0,27</b>  | 0.00017205593019912  | <b>-0,46</b> | 3.34329888230106e-11 |
| NLRCS   | ENSG00000140853 | <b>0,25</b>  | 0.000597976325727681 | <b>-0,31</b> | 1.17107390335828e-05 |
| NLRX1   | ENSG00000160703 | <b>0,62</b>  | 2.53561542128123e-21 | <b>0,06</b>  | 0.393120541657589    |
| NOS2    | ENSG00000007171 | <b>0,04</b>  | 0.553775969547528    | <b>-0,01</b> | 0.849052646270222    |
| OAS1    | ENSG00000089127 | <b>-0,15</b> | 0.0328201484234877   | <b>0,05</b>  | 0.480262960349265    |
| OAS2    | ENSG00000111335 | <b>-0,24</b> | 0.000864956449482526 | <b>-0,08</b> | 0.252654097541656    |
| OAS3    | ENSG00000111331 | <b>-0,26</b> | 0.000330722148169071 | <b>-0,14</b> | 0.0474655004707886   |

|         |                 |              |                      |              |                      |
|---------|-----------------|--------------|----------------------|--------------|----------------------|
| OASL    | ENSG00000135114 | <b>-0,28</b> | 0.000104403949329355 | <b>-0,29</b> | 3.71092703163127e-05 |
| OTUD5   | ENSG00000068308 | <b>0,29</b>  | 6.14263040136555e-05 | <b>0,01</b>  | 0.87548682456972     |
| PCBP2   | ENSG00000197111 | <b>-0,59</b> | 5.60588267442549e-19 | <b>-0,22</b> | 0.00202972390267889  |
| PDCD4   | ENSG00000150593 | <b>-0,42</b> | 2.1729409110657e-09  | <b>0,06</b>  | 0.442384894582261    |
| PDPK1   | ENSG00000140992 | <b>-0,03</b> | 0.729074006098694    | <b>0,32</b>  | 8.23945206464345e-06 |
| PIAS1   | ENSG00000033800 | <b>-0,28</b> | 9.55460502211832e-05 | <b>0,38</b>  | 4.92018850220099e-08 |
| PIAS3   | ENSG00000131788 | <b>0,19</b>  | 0.00845215288768675  | <b>0,13</b>  | 0.0730097499669709   |
| PIAS4   | ENSG00000105229 | <b>0,79</b>  | 2.5433816202907e-41  | <b>0,16</b>  | 0.0283593171943679   |
| PIK3CA  | ENSG00000121879 | <b>-0,67</b> | 2.39529234700326e-26 | <b>-0,17</b> | 0.0210010819676031   |
| PIK3CB  | ENSG00000051382 | <b>-0,63</b> | 4.05405996223875e-22 | <b>-0,20</b> | 0.00456660588519594  |
| PIK3CD  | ENSG00000171608 | <b>0,29</b>  | 5.85616427793295e-05 | <b>-0,34</b> | 1.86148637990212e-06 |
| PIK3R1  | ENSG00000145675 | <b>-0,70</b> | 4.94075866857068e-29 | <b>-0,09</b> | 0.19404408185396     |
| PIK3R2  | ENSG00000105647 | <b>0,77</b>  | 6.52792398222713e-39 | <b>0,42</b>  | 2.10515977066689e-09 |
| PIK3R3  | ENSG00000117461 | <b>-0,05</b> | 0.526593151012579    | <b>0,55</b>  | 1.10202969066579e-16 |
| PIN1    | ENSG00000127445 | <b>0,73</b>  | 1.91107049191611e-33 | <b>0,10</b>  | 0.154176054860317    |
| PLCG2   | ENSG00000197943 | <b>-0,16</b> | 0.0230647123569113   | <b>0,20</b>  | 0.00670425002113378  |
| PML     | ENSG00000140464 | <b>0,61</b>  | 1.82685940214907e-20 | <b>-0,07</b> | 0.305318714987008    |
| POLR1C  | ENSG00000171453 | <b>-0,65</b> | 6.72601292243326e-24 | <b>-0,13</b> | 0.0787710947675291   |
| POLR1D  | ENSG00000186184 | <b>-0,06</b> | 0.420677839503687    | <b>-0,47</b> | 4.01528347944659e-12 |
| POLR2E  | ENSG00000099817 | <b>0,69</b>  | 2.2828896680807e-28  | <b>0,00</b>  | 0.951618086529431    |
| POLR2F  | ENSG00000100142 | <b>0,60</b>  | 7.13476459649141e-20 | <b>-0,08</b> | 0.271306099048625    |
| POLR2H  | ENSG00000163882 | <b>-0,16</b> | 0.0269426954024577   | <b>-0,41</b> | 5.04454933891137e-09 |
| POLR2K  | ENSG00000147669 | <b>-0,46</b> | 2.07301605992995e-11 | <b>0,04</b>  | 0.626605996919733    |
| POLR2L  | ENSG00000177700 | <b>0,62</b>  | 5.2426411038459e-22  | <b>-0,11</b> | 0.122441216082193    |
| POLR3A  | ENSG00000148606 | <b>-0,39</b> | 2.44187865131178e-08 | <b>0,26</b>  | 0.000256085395636696 |
| POLR3B  | ENSG00000013503 | <b>-0,43</b> | 4.75155332246433e-10 | <b>0,13</b>  | 0.0674830671013431   |
| POLR3C  | ENSG00000186141 | <b>-0,73</b> | 1.07674710882475e-33 | <b>-0,34</b> | 1.8282085847092e-06  |
| POLR3D  | ENSG00000168495 | <b>-0,38</b> | 4.00090315212754e-08 | <b>0,03</b>  | 0.674412646468754    |
| POLR3E  | ENSG00000058600 | <b>0,49</b>  | 4.8213937289235e-13  | <b>-0,13</b> | 0.0816767426354021   |
| POLR3F  | ENSG00000132664 | <b>-0,26</b> | 0.000337003956817899 | <b>-0,09</b> | 0.194474995439798    |
| POLR3G  | ENSG00000113356 | <b>0,12</b>  | 0.0951089131873933   | <b>0,01</b>  | 0.94427891029144     |
| POLR3GL | ENSG00000121851 | <b>0,09</b>  | 0.207137666035868    | <b>0,53</b>  | 5.7375730845458e-15  |
| POLR3H  | ENSG00000100413 | <b>0,50</b>  | 1.13306605884702e-13 | <b>0,00</b>  | 0.954956478957725    |
| POLR3K  | ENSG00000161980 | <b>-0,14</b> | 0.0510724430660249   | <b>0,17</b>  | 0.020543450809824    |
| PRKCA   | ENSG00000154229 | <b>-0,38</b> | 6.21125575143855e-08 | <b>0,14</b>  | 0.0617953671253469   |
| PRKCD   | ENSG00000163932 | <b>-0,35</b> | 8.07477316843992e-07 | <b>-0,18</b> | 0.0106597716713838   |
| PRMT1   | ENSG00000126457 | <b>0,19</b>  | 0.00840133714714741  | <b>-0,12</b> | 0.0966882497966188   |
| PSMB8   | ENSG00000204264 | <b>-0,61</b> | 3.10896602614374e-21 | <b>-0,37</b> | 1.56551206915383e-07 |
| PSMB9   | ENSG00000240065 | <b>-0,07</b> | 0.31394140105893     | <b>-0,33</b> | 2.37041173053431e-06 |
| PTGES2  | ENSG00000148334 | <b>0,74</b>  | 2.04536819350297e-34 | <b>0,01</b>  | 0.879309167688131    |
| PTK2B   | ENSG00000120899 | <b>0,18</b>  | 0.0104280244768455   | <b>-0,09</b> | 0.227088637359813    |
| PTPN1   | ENSG00000196396 | <b>0,13</b>  | 0.0757562099293001   | <b>0,19</b>  | 0.00894536646261136  |
| PTPN11  | ENSG00000179295 | <b>-0,44</b> | 2.83742915818007e-10 | <b>0,19</b>  | 0.00849151413351793  |
| PTPN6   | ENSG00000111679 | <b>0,28</b>  | 9.07159554868796e-05 | <b>-0,09</b> | 0.193182499885867    |
| PTPRC   | ENSG00000081237 | <b>-0,40</b> | 1.48074898772267e-08 | <b>-0,12</b> | 0.0917501247852444   |
| PYCARD  | ENSG00000103490 | <b>0,50</b>  | 9.96104671154407e-14 | <b>-0,16</b> | 0.0309530348574785   |
| RAC1    | ENSG00000136238 | <b>-0,57</b> | 4.08102412241896e-18 | <b>-0,25</b> | 0.000530049895111784 |
| RACK1   | ENSG00000204628 | <b>-0,51</b> | 4.53203202169132e-14 | <b>-0,42</b> | 1.06766533445868e-09 |
| RAP1A   | ENSG00000116473 | <b>-0,62</b> | 2.68365683637027e-21 | <b>-0,06</b> | 0.375865435998495    |
| RAPGEF1 | ENSG00000107263 | <b>0,47</b>  | 7.21420063705013e-12 | <b>-0,15</b> | 0.0328580551711442   |
| REG1A   | ENSG00000115386 | <b>-0,50</b> | 1.35020805961934e-13 | <b>-0,50</b> | 1.51155536234944e-13 |
| REL     | ENSG00000162924 | <b>-0,52</b> | 7.85048830110015e-15 | <b>-0,14</b> | 0.0478115197701923   |
| RELA    | ENSG00000173039 | <b>0,33</b>  | 2.60509100663762e-06 | <b>-0,32</b> | 4.81257582740091e-06 |
| RELB    | ENSG00000104856 | <b>0,34</b>  | 1.49315930795871e-06 | <b>-0,40</b> | 1.15561076208071e-08 |
| RIPK1   | ENSG00000137275 | <b>-0,55</b> | 8.4800183856022e-17  | <b>-0,05</b> | 0.461793480056313    |
| RIPK3   | ENSG00000129465 | <b>-0,20</b> | 0.00530966421272976  | <b>-0,42</b> | 1.15219531942584e-09 |
| RNASEL  | ENSG00000135828 | <b>-0,23</b> | 0.00109628575311977  | <b>0,14</b>  | 0.060581002434791    |
| RNF125  | ENSG00000101695 | <b>-0,51</b> | 5.82151579330119e-14 | <b>-0,29</b> | 5.12187430003616e-05 |

|                |                 |              |                      |              |                      |
|----------------|-----------------|--------------|----------------------|--------------|----------------------|
| RNF135         | ENSG00000181481 | <b>-0,22</b> | 0.00260534700927174  | <b>0,18</b>  | 0.0150170743464126   |
| RNF216         | ENSG00000011275 | <b>0,32</b>  | 6.44379989509249e-06 | <b>0,33</b>  | 2.97326583175837e-06 |
| RPS27A         | ENSG00000143947 | <b>-0,52</b> | 1.29280938389443e-14 | <b>-0,34</b> | 1.10727580600848e-06 |
| RPS6           | ENSG00000137154 | <b>-0,68</b> | 3.50912401250252e-27 | <b>-0,36</b> | 2.15580365028761e-07 |
| RPS6KA4        | ENSG00000162302 | <b>0,60</b>  | 6.93114278622626e-20 | <b>-0,13</b> | 0.0645481035396358   |
| RPS6KA5        | ENSG00000100784 | <b>-0,44</b> | 2.27624067378863e-10 | <b>-0,45</b> | 9.60597349232598e-11 |
| RPS6KB1        | ENSG00000108443 | <b>-0,56</b> | 2.24965118646076e-17 | <b>-0,32</b> | 4.80619939811087e-06 |
| RPTOR          | ENSG00000141564 | <b>0,59</b>  | 1.3986796784502e-19  | <b>0,04</b>  | 0.615954005030012    |
| RSAD2          | ENSG00000134321 | <b>-0,22</b> | 0.00234969317224505  | <b>-0,19</b> | 0.00789868450016011  |
| S100B          | ENSG00000160307 | <b>-0,12</b> | 0.104800630357125    | <b>0,24</b>  | 0.000667004503289965 |
| SAA1           | ENSG00000173432 | <b>-0,20</b> | 0.00533019861105571  | <b>-0,17</b> | 0.0223168546849501   |
| SAMHD1         | ENSG00000101347 | <b>-0,43</b> | 4.29490781061603e-10 | <b>-0,09</b> | 0.239278167595729    |
| SIKE1          | ENSG00000052723 | <b>-0,49</b> | 4.9648970395018e-13  | <b>-0,01</b> | 0.856104626085877    |
| SMAD7          | ENSG00000101665 | <b>0,44</b>  | 2.95199093677303e-10 | <b>0,05</b>  | 0.504104942979813    |
| SNW1           | ENSG00000100603 | <b>-0,48</b> | 2.9315833496172e-12  | <b>-0,06</b> | 0.438683105845325    |
| SOCS1          | ENSG00000185338 | <b>0,62</b>  | 1.13362876375065e-21 | <b>-0,11</b> | 0.135148843402378    |
| SOCS3          | ENSG00000184557 | <b>0,24</b>  | 0.000917143429051332 | <b>-0,39</b> | 1.89577019821364e-08 |
| SPI1           | ENSG00000066336 | <b>0,49</b>  | 9.08606474832705e-13 | <b>-0,10</b> | 0.173284886774545    |
| SRC            | ENSG00000197122 | <b>0,08</b>  | 0.262402472097997    | <b>-0,39</b> | 2.39005445263932e-08 |
| STAT1          | ENSG00000115415 | <b>-0,46</b> | 1.4084182737644e-11  | <b>0,08</b>  | 0.270253906811317    |
| STAT2          | ENSG00000170581 | <b>-0,39</b> | 1.74298679914003e-08 | <b>0,06</b>  | 0.42665854407596     |
| STAT3          | ENSG00000168610 | <b>-0,46</b> | 1.24763123118793e-11 | <b>0,13</b>  | 0.0793916043044484   |
| STAT4          | ENSG00000138378 | <b>-0,02</b> | 0.759118455330614    | <b>0,47</b>  | 5.63943268292532e-12 |
| STAT5A         | ENSG00000126561 | <b>-0,17</b> | 0.0193706168094797   | <b>-0,35</b> | 8.63634668143367e-07 |
| TANK           | ENSG00000136560 | <b>-0,76</b> | 7.68308912814543e-38 | <b>-0,31</b> | 1.21568714013484e-05 |
| TAP1           | ENSG00000168394 | <b>-0,42</b> | 1.73146238727583e-09 | <b>-0,44</b> | 2.13727148818295e-10 |
| TAX1BP1        | ENSG00000106052 | <b>-0,55</b> | 1.28351384299721e-16 | <b>-0,07</b> | 0.328172593866926    |
| TBK1           | ENSG00000183735 | <b>-0,29</b> | 3.91972671249438e-05 | <b>-0,17</b> | 0.0192847214049868   |
| TBKBP1         | ENSG00000198933 | <b>0,64</b>  | 5.27569005744411e-23 | <b>0,00</b>  | 0.946312658712726    |
| TICAM1         | ENSG00000127666 | <b>0,63</b>  | 1.40496099616993e-22 | <b>-0,10</b> | 0.149260318141619    |
| TICAM2         | ENSG00000243414 | <b>0,06</b>  | 0.413887218692825    | <b>0,09</b>  | 0.22107127916853     |
| TIRAP          | ENSG00000150455 | <b>-0,24</b> | 0.00087036894631872  | <b>0,11</b>  | 0.12756277882149     |
| TKFC           | ENSG00000149476 | <b>0,57</b>  | 5.43588946004606e-18 | <b>0,02</b>  | 0.819657856220774    |
| TLR3           | ENSG00000164342 | <b>-0,47</b> | 4.00939827290733e-12 | <b>-0,39</b> | 2.31978643767263e-08 |
| TLR4           | ENSG00000136869 | <b>-0,43</b> | 7.82742680718726e-10 | <b>-0,07</b> | 0.357624727027409    |
| TMEM173        | ENSG00000184584 | <b>-0,11</b> | 0.11548464364466     | <b>-0,11</b> | 0.123682115112946    |
| TMEM256-PLSCR3 | ENSG00000187838 | <b>0,57</b>  | 4.94436605652343e-18 | <b>-0,08</b> | 0.270944163989383    |
| TNF            | ENSG00000232810 | <b>-0,17</b> | 0.0219343961824148   | <b>-0,33</b> | 2.27682620675884e-06 |
| TNFAIP3        | ENSG00000118503 | <b>-0,35</b> | 5.59862265015102e-07 | <b>-0,54</b> | 1.00186587810008e-15 |
| TOMM70         | ENSG00000154174 | <b>-0,45</b> | 4.46333941640318e-11 | <b>0,06</b>  | 0.398543697012559    |
| TRADD          | ENSG00000102871 | <b>0,64</b>  | 1.44562537015072e-23 | <b>-0,11</b> | 0.126888734861629    |
| TRAF2          | ENSG00000127191 | <b>0,62</b>  | 1.04382589432806e-21 | <b>-0,03</b> | 0.656224728116167    |
| TRAF3          | ENSG00000131323 | <b>0,56</b>  | 1.74566636174895e-17 | <b>0,09</b>  | 0.213743615770432    |
| TRAF6          | ENSG00000175104 | <b>-0,55</b> | 8.75714446453464e-17 | <b>-0,03</b> | 0.708375135881821    |
| TREX1          | ENSG00000213689 | <b>0,56</b>  | 3.19332791810519e-17 | <b>-0,11</b> | 0.136949702291795    |
| TRIM10         | ENSG00000204613 | <b>-0,23</b> | 0.00156289312372338  | <b>-0,24</b> | 0.000974832087318299 |
| TRIM11         | ENSG00000154370 | <b>0,56</b>  | 2.18117330494137e-17 | <b>-0,12</b> | 0.101633916584728    |
| TRIM13         | ENSG00000204977 | <b>-0,21</b> | 0.00329184242278166  | <b>0,03</b>  | 0.70871019540628     |
| TRIM14         | ENSG00000106785 | <b>0,20</b>  | 0.00517951985555743  | <b>-0,03</b> | 0.700124652637551    |
| TRIM15         | ENSG00000204610 | <b>0,06</b>  | 0.407606701103027    | <b>-0,14</b> | 0.0548654665661716   |
| TRIM16         | ENSG00000221926 | <b>-0,41</b> | 3.74669092039446e-09 | <b>-0,22</b> | 0.00253787350219161  |
| TRIM16L        | ENSG00000108448 | <b>-0,41</b> | 5.98827791901165e-09 | <b>-0,13</b> | 0.0832113088151327   |
| TRIM17         | ENSG00000162931 | <b>0,28</b>  | 7.0171863253822e-05  | <b>-0,15</b> | 0.0400242635409909   |
| TRIM2          | ENSG00000109654 | <b>-0,06</b> | 0.404391480392056    | <b>0,53</b>  | 3.48048683374772e-15 |
| TRIM21         | ENSG00000132109 | <b>-0,52</b> | 1.69581064085608e-14 | <b>-0,23</b> | 0.00114695604613319  |
| TRIM22         | ENSG00000132274 | <b>-0,29</b> | 5.60814749934302e-05 | <b>-0,20</b> | 0.00657301357749269  |
| TRIM23         | ENSG00000113595 | <b>-0,24</b> | 0.00106071157031425  | <b>0,30</b>  | 2.66713333087657e-05 |
| TRIM24         | ENSG00000122779 | <b>-0,56</b> | 2.05264525241692e-17 | <b>-0,08</b> | 0.296038338205718    |

|              |                 |              |                      |              |                      |
|--------------|-----------------|--------------|----------------------|--------------|----------------------|
| TRIM25       | ENSG00000121060 | <b>-0,52</b> | 6.71996864034073e-15 | <b>-0,21</b> | 0.00382735405395848  |
| TRIM26       | ENSG00000234127 | <b>-0,17</b> | 0.0188485001001899   | <b>-0,29</b> | 4.20187009111721e-05 |
| TRIM27       | ENSG00000204713 | <b>-0,26</b> | 0.000272990296265981 | <b>-0,08</b> | 0.245735717831493    |
| TRIM28       | ENSG00000130726 | <b>0,45</b>  | 7.02028911433587e-11 | <b>-0,12</b> | 0.104425585181782    |
| TRIM29       | ENSG00000137699 | <b>-0,11</b> | 0.136420081544235    | <b>-0,19</b> | 0.00917730597847544  |
| TRIM3        | ENSG00000110171 | <b>0,65</b>  | 2.28360443101778e-24 | <b>0,18</b>  | 0.0153836516626748   |
| TRIM31       | ENSG00000204616 | <b>-0,15</b> | 0.0351680587470194   | <b>-0,25</b> | 0.000410941117778941 |
| TRIM32       | ENSG00000119401 | <b>-0,50</b> | 3.06309645124751e-13 | <b>0,06</b>  | 0.407611804186044    |
| TRIM33       | ENSG00000197323 | <b>-0,41</b> | 4.11854950265433e-09 | <b>0,10</b>  | 0.160088315725925    |
| TRIM34       | ENSG00000258659 | <b>-0,47</b> | 4.18960538952854e-12 | <b>-0,21</b> | 0.00307383823744581  |
| TRIM35       | ENSG00000104228 | <b>-0,01</b> | 0.934064622295998    | <b>0,12</b>  | 0.101272344512958    |
| TRIM36       | ENSG00000152503 | <b>-0,43</b> | 5.82980472562968e-10 | <b>-0,25</b> | 0.000604174657109914 |
| TRIM37       | ENSG00000108395 | <b>-0,15</b> | 0.0413269256599019   | <b>0,48</b>  | 1.79861350871942e-12 |
| TRIM38       | ENSG00000112343 | <b>-0,51</b> | 3.94248494347381e-14 | <b>-0,31</b> | 1.5450032546911e-05  |
| TRIM39       | ENSG00000204599 | <b>-0,14</b> | 0.0474505278124327   | <b>0,11</b>  | 0.132556193261022    |
| TRIM39-RPP21 | ENSG00000248167 | <b>0,60</b>  | 3.6248595677376e-20  | <b>-0,07</b> | 0.317128305900084    |
| TRIM4        | ENSG00000146833 | <b>-0,13</b> | 0.0631532512088453   | <b>0,40</b>  | 6.41711007654757e-09 |
| TRIM41       | ENSG00000146063 | <b>0,53</b>  | 3.21216373174691e-15 | <b>-0,03</b> | 0.716586627958111    |
| TRIM44       | ENSG00000166326 | <b>-0,57</b> | 8.62323511412767e-18 | <b>0,05</b>  | 0.534847210650807    |
| TRIM45       | ENSG00000134253 | <b>-0,28</b> | 7.80981009979289e-05 | <b>-0,36</b> | 3.74850625143589e-07 |
| TRIM46       | ENSG00000163462 | <b>0,71</b>  | 2.6361543793505e-30  | <b>0,18</b>  | 0.010887443150471    |
| TRIM47       | ENSG00000132481 | <b>0,42</b>  | 1.47643880143584e-09 | <b>-0,34</b> | 1.3199292958065e-06  |
| TRIM5        | ENSG00000132256 | <b>-0,49</b> | 3.73190027201171e-13 | <b>-0,27</b> | 0.000168554525425517 |
| TRIM50       | ENSG00000146755 | <b>0,23</b>  | 0.00134237225802692  | <b>-0,19</b> | 0.0101819990336803   |
| TRIM52       | ENSG00000183718 | <b>0,24</b>  | 0.000637574722293975 | <b>-0,04</b> | 0.572122128641236    |
| TRIM52-AS1   | ENSG00000248275 | <b>0,25</b>  | 0.000515736123557216 | <b>0,08</b>  | 0.274163183875925    |
| TRIM54       | ENSG00000138100 | <b>0,39</b>  | 2.44401011971338e-08 | <b>-0,29</b> | 3.92635778553277e-05 |
| TRIM55       | ENSG00000147573 | <b>-0,01</b> | 0.885213223865771    | <b>0,39</b>  | 2.61027390901611e-08 |
| TRIM56       | ENSG00000169871 | <b>0,22</b>  | 0.00254659398818353  | <b>0,00</b>  | 0.996849285750957    |
| TRIM58       | ENSG00000162722 | <b>0,05</b>  | 0.45141543797027     | <b>0,09</b>  | 0.199965775171284    |
| TRIM59       | ENSG00000213186 | <b>-0,23</b> | 0.00131951907721887  | <b>0,22</b>  | 0.0027207590845368   |
| TRIM6        | ENSG00000121236 | <b>-0,56</b> | 4.72032373754496e-17 | <b>-0,39</b> | 2.67008418478172e-08 |
| TRIM60P18    | ENSG00000227986 | <b>0,15</b>  | 0.0424259589264074   | <b>0,00</b>  | 0.976543048100179    |
| TRIM61       | ENSG00000183439 | <b>-0,32</b> | 7.56410831920075e-06 | <b>0,21</b>  | 0.00298408112157224  |
| TRIM62       | ENSG00000116525 | <b>0,11</b>  | 0.139952373286212    | <b>0,02</b>  | 0.798763084780243    |
| TRIM63       | ENSG00000158022 | <b>-0,10</b> | 0.177816128095305    | <b>-0,14</b> | 0.0618388406339085   |
| TRIM65       | ENSG00000141569 | <b>0,43</b>  | 8.62955850607143e-10 | <b>0,06</b>  | 0.401967125570945    |
| TRIM66       | ENSG00000166436 | <b>0,09</b>  | 0.230875767021715    | <b>-0,04</b> | 0.545006077859981    |
| TRIM67       | ENSG00000119283 | <b>0,08</b>  | 0.249584764110123    | <b>-0,06</b> | 0.383448353125519    |
| TRIM68       | ENSG00000167333 | <b>-0,50</b> | 2.53573098673162e-13 | <b>0,16</b>  | 0.0252675494280328   |
| TRIM69       | ENSG00000185880 | <b>-0,43</b> | 6.69769668719785e-10 | <b>-0,27</b> | 0.00016951169846237  |
| TRIM6-TRIM34 | ENSG00000258588 | <b>-0,50</b> | 1.40409601550081e-13 | <b>-0,23</b> | 0.00171544328588778  |
| TRIM7        | ENSG00000146054 | <b>0,48</b>  | 2.51082976714821e-12 | <b>0,08</b>  | 0.291074324382573    |
| TRIM71       | ENSG00000206557 | <b>0,04</b>  | 0.590216084808043    | <b>0,07</b>  | 0.309221870940347    |
| TRIM73       | ENSG00000178809 | <b>0,44</b>  | 1.79002193202822e-10 | <b>-0,11</b> | 0.116525394148827    |
| TRIM74       | ENSG00000155428 | <b>0,21</b>  | 0.00283220874435234  | <b>-0,18</b> | 0.0154366524699441   |
| TRIM8        | ENSG00000171206 | <b>0,54</b>  | 3.93309820324546e-16 | <b>-0,15</b> | 0.0422667660760826   |
| TRIM9        | ENSG00000100505 | <b>0,11</b>  | 0.133473306241226    | <b>0,47</b>  | 5.41138252119461e-12 |
| TYK2         | ENSG00000105397 | <b>0,65</b>  | 1.55184202437123e-24 | <b>-0,02</b> | 0.769230270167196    |
| UBA52        | ENSG00000221983 | <b>-0,72</b> | 1.86618598734546e-31 | <b>-0,24</b> | 0.000873939378966847 |
| UBA7         | ENSG00000182179 | <b>0,05</b>  | 0.480049135193552    | <b>-0,23</b> | 0.00158606487991596  |
| UBB          | ENSG00000170315 | <b>-0,59</b> | 2.50119210933739e-19 | <b>0,14</b>  | 0.0625638107445379   |
| UBC          | ENSG00000150991 | <b>-0,56</b> | 2.78723123981906e-17 | <b>-0,07</b> | 0.364084254050423    |
| UBE2D1       | ENSG00000072401 | <b>-0,17</b> | 0.0223304402788047   | <b>-0,37</b> | 1.48904201358508e-07 |
| UBE2D2       | ENSG00000131508 | <b>-0,12</b> | 0.0896614230489009   | <b>-0,02</b> | 0.767514104162234    |
| UBE2D3       | ENSG00000109332 | <b>-0,45</b> | 7.80311120389263e-11 | <b>-0,11</b> | 0.116257490538917    |
| UBE2K        | ENSG00000078140 | <b>-0,56</b> | 4.67131082155242e-17 | <b>0,05</b>  | 0.524008506943129    |
| UBE2L6       | ENSG00000156587 | <b>-0,40</b> | 1.07744726518065e-08 | <b>-0,01</b> | 0.928487466220116    |



|       |                 |              |                      |              |                      |
|-------|-----------------|--------------|----------------------|--------------|----------------------|
| USP18 | ENSG00000184979 | <b>-0,22</b> | 0.00230514533456041  | <b>0,38</b>  | 4.49955508301541e-08 |
| VAV1  | ENSG00000141968 | <b>-0,22</b> | 0.00188089971434898  | <b>-0,11</b> | 0.137469707678826    |
| XAF1  | ENSG00000132530 | <b>-0,12</b> | 0.10030354173073     | <b>-0,04</b> | 0.607941869840259    |
| ZAP70 | ENSG00000115085 | <b>0,31</b>  | 9.52484863713989e-06 | <b>-0,18</b> | 0.0119483164628887   |

Table S2B

**MAFA and MAFB co-expression correlations with genes involved in cytokine signaling**

| Genename | GeneID          | MAFA_GC      | P-value               | MAFB_GC      | P-value              |
|----------|-----------------|--------------|-----------------------|--------------|----------------------|
| AAAS     | ENSG00000094914 | <b>0,06</b>  | 0.418353187153833     | <b>0,02</b>  | 0.803032573683404    |
| ACTN2    | ENSG00000077522 | <b>-0,16</b> | 0.0247037136171466    | <b>-0,51</b> | 6.89902915031085e-14 |
| ADAM17   | ENSG00000151694 | <b>-0,72</b> | 1.267694686376e-31    | <b>-0,42</b> | 1.01165290409279e-09 |
| ADAR     | ENSG00000160710 | <b>-0,48</b> | 2.5866477004417e-12   | <b>0,27</b>  | 0.000128472739365877 |
| AKAP9    | ENSG00000127914 | <b>-0,01</b> | 0.850846400836398     | <b>0,29</b>  | 3.79979757256914e-05 |
| AKT1     | ENSG00000142208 | <b>0,49</b>  | 4.07315761278472e-13  | <b>-0,12</b> | 0.0868735039250571   |
| ALOX5    | ENSG00000012779 | <b>0,30</b>  | 1.87152802173304e-05  | <b>-0,06</b> | 0.437355233947124    |
| ANGPT1   | ENSG00000154188 | <b>-0,24</b> | 0.00074241863314501   | <b>0,09</b>  | 0.202952411457814    |
| ANXA1    | ENSG00000135046 | <b>-0,50</b> | 2.37579656480532e-13  | <b>-0,30</b> | 1.97301562785172e-05 |
| APBB1IP  | ENSG00000077420 | <b>-0,15</b> | 0.0325617445019794    | <b>-0,02</b> | 0.745400340305931    |
| ARAF     | ENSG00000078061 | <b>0,39</b>  | 1.91839473261534e-08  | <b>-0,19</b> | 0.00903695751973378  |
| ARIH1    | ENSG00000166233 | <b>-0,60</b> | 4.52948091855036e-20  | <b>-0,05</b> | 0.500349434672052    |
| ARRB1    | ENSG00000137486 | <b>-0,35</b> | 6.15697284981389e-07  | <b>0,09</b>  | 0.191838526312754    |
| ARRB2    | ENSG00000141480 | <b>0,19</b>  | 0.00850345391815282   | <b>0,05</b>  | 0.531170073130129    |
| ARTN     | ENSG00000117407 | <b>0,59</b>  | 4.91100952427545e-19  | <b>0,03</b>  | 0.690824983544474    |
| B2M      | ENSG00000166710 | <b>-0,63</b> | 1.574727246308634e-22 | <b>-0,26</b> | 0.000301092518759588 |
| BATF     | ENSG00000156127 | <b>0,15</b>  | 0.040132158107048     | <b>-0,13</b> | 0.0763698625994746   |
| BCL2     | ENSG00000171791 | <b>-0,61</b> | 1.57569459075146e-20  | <b>-0,37</b> | 1.25077746579985e-07 |
| BCL2L1   | ENSG00000171552 | <b>-0,05</b> | 0.485231362791119     | <b>-0,20</b> | 0.00575913089355628  |
| BCL6     | ENSG00000113916 | <b>-0,13</b> | 0.0713773538285527    | <b>-0,51</b> | 6.06666734707207e-14 |
| BIRC2    | ENSG00000110330 | <b>-0,70</b> | 1.91247074936007e-29  | <b>-0,49</b> | 3.47471121485483e-13 |
| BIRC3    | ENSG00000023445 | <b>-0,53</b> | 5.64894897445921e-15  | <b>-0,52</b> | 1.01889991519376e-14 |
| BIRC5    | ENSG00000089685 | <b>0,00</b>  | 0.973333701574282     | <b>0,15</b>  | 0.0340550428876236   |
| BLNK     | ENSG00000095585 | <b>-0,43</b> | 7.83727840585589e-10  | <b>-0,42</b> | 2.33253796601925e-09 |
| BRAF     | ENSG00000157764 | <b>-0,20</b> | 0.00537578330723444   | <b>0,27</b>  | 0.000171517098880588 |
| BRAP     | ENSG00000089234 | <b>-0,23</b> | 0.00133923489047767   | <b>0,27</b>  | 0.00012032414880185  |
| BRWD1    | ENSG00000185658 | <b>-0,01</b> | 0.907683994264766     | <b>-0,01</b> | 0.883376751895466    |
| BST2     | ENSG00000130303 | <b>0,20</b>  | 0.00654340416103118   | <b>-0,18</b> | 0.0140068959553135   |
| BTC      | ENSG00000174808 | <b>-0,21</b> | 0.00292347572146095   | <b>0,16</b>  | 0.0258743696278418   |
| BTRC     | ENSG00000166167 | <b>-0,41</b> | 2.45485533120055e-09  | <b>0,32</b>  | 6.28551551572272e-06 |
| CALM1    | ENSG00000198668 | <b>-0,23</b> | 0.00171352867689847   | <b>0,47</b>  | 4.1178448492596e-12  |
| CALM2    | ENSG00000143933 | <b>-0,68</b> | 3.47715337791891e-27  | <b>-0,21</b> | 0.00303439391972829  |
| CALM3    | ENSG00000160014 | <b>-0,14</b> | 0.0504772536289049    | <b>-0,04</b> | 0.59804089178043     |
| CAMK2A   | ENSG00000070808 | <b>0,04</b>  | 0.559925961380528     | <b>0,03</b>  | 0.690815171680589    |
| CAMK2B   | ENSG00000058404 | <b>0,74</b>  | 1.32581980065863e-34  | <b>0,48</b>  | 2.01245174844293e-12 |
| CAMK2D   | ENSG00000145349 | <b>-0,07</b> | 0.308804696441233     | <b>0,44</b>  | 1.26025680881935e-10 |
| CAMK2G   | ENSG00000148660 | <b>0,09</b>  | 0.229968443341259     | <b>0,56</b>  | 4.74561885427332e-17 |
| CASP1    | ENSG00000137752 | <b>-0,37</b> | 1.27731924197375e-07  | <b>-0,28</b> | 9.59804207795709e-05 |
| CASP3    | ENSG00000164305 | <b>-0,44</b> | 2.73282089423008e-10  | <b>-0,27</b> | 0.000118375769396683 |
| CBL      | ENSG00000110395 | <b>-0,55</b> | 3.46855474788441e-16  | <b>0,05</b>  | 0.504839833517787    |
| CCL11    | ENSG00000172156 | <b>0,00</b>  | 0.954269817554332     | <b>-0,13</b> | 0.0817787883638779   |
| CCL2     | ENSG00000108691 | <b>-0,47</b> | 6.41416189475132e-12  | <b>-0,46</b> | 1.41332859075084e-11 |
| CCL20    | ENSG00000115009 | <b>-0,18</b> | 0.0128253516225991    | <b>-0,26</b> | 0.000341703645504321 |
| CCL21    | ENSG00000137077 | <b>-0,29</b> | 4.65304645899121e-05  | <b>-0,21</b> | 0.00301162239899604  |

|        |                 |              |                      |              |                      |
|--------|-----------------|--------------|----------------------|--------------|----------------------|
| CCL22  | ENSG00000102962 | <b>-0,26</b> | 0.000314023038841977 | <b>-0,25</b> | 0.000424401838374593 |
| CCL26  | ENSG00000006606 | <b>0,00</b>  | 0.950115594817246    | <b>0,20</b>  | 0.0066928053768366   |
| CCL27  | ENSG00000213927 | <b>0,30</b>  | 1.90683482366933e-05 | <b>0,02</b>  | 0.782201176780412    |
| CCL28  | ENSG00000151882 | <b>-0,40</b> | 1.35714015049185e-08 | <b>-0,21</b> | 0.00387088706530998  |
| CCL7   | ENSG00000108688 | <b>-0,43</b> | 3.93576890874292e-10 | <b>-0,48</b> | 3.56698113758084e-12 |
| CCL8   | ENSG00000108700 | <b>-0,27</b> | 0.000146778473349971 | <b>-0,14</b> | 0.0540654083282926   |
| CCND1  | ENSG00000110092 | <b>-0,33</b> | 4.00428196513867e-06 | <b>-0,37</b> | 1.33681641242413e-07 |
| CCR1   | ENSG00000163823 | <b>-0,35</b> | 5.08879003215275e-07 | <b>0,04</b>  | 0.559399183849147    |
| CCR10  | ENSG00000184451 | <b>0,61</b>  | 3.18812512187198e-21 | <b>0,04</b>  | 0.594731985386306    |
| CCR5   | ENSG00000160791 | <b>-0,38</b> | 5.16932265268277e-08 | <b>-0,03</b> | 0.706147121741022    |
| CCR6   | ENSG00000112486 | <b>-0,26</b> | 0.000275987101459466 | <b>0,05</b>  | 0.471190891314659    |
| CCR7   | ENSG00000126353 | <b>-0,12</b> | 0.105218799104109    | <b>-0,29</b> | 5.34596688565147e-05 |
| CCR9   | ENSG00000173585 | <b>-0,15</b> | 0.0440352197050433   | <b>-0,25</b> | 0.00045398895934604  |
| CCRL2  | ENSG00000121797 | <b>-0,41</b> | 2.98920790419968e-09 | <b>-0,35</b> | 7.00620400797777e-07 |
| CD27   | ENSG00000139193 | <b>-0,02</b> | 0.735132116826637    | <b>0,18</b>  | 0.0153443478823606   |
| CD36   | ENSG00000135218 | <b>-0,14</b> | 0.0501483907875544   | <b>0,33</b>  | 3.98276990022087e-06 |
| CD4    | ENSG00000010610 | <b>-0,26</b> | 0.00026842756662553  | <b>0,09</b>  | 0.203957226172094    |
| CD40   | ENSG00000101017 | <b>-0,22</b> | 0.00245987679052234  | <b>-0,27</b> | 0.000173068923433882 |
| CD44   | ENSG00000026508 | <b>-0,61</b> | 3.86976825536918e-21 | <b>-0,55</b> | 8.21955012712848e-17 |
| CD80   | ENSG00000121594 | <b>-0,09</b> | 0.222628048127229    | <b>-0,26</b> | 0.000315313495242874 |
| CD86   | ENSG00000114013 | <b>-0,45</b> | 5.19997845189528e-11 | <b>-0,22</b> | 0.00274785207855291  |
| CDKN1A | ENSG00000124762 | <b>0,21</b>  | 0.00313834927732949  | <b>-0,13</b> | 0.0807422336973029   |
| CEBPD  | ENSG00000221869 | <b>0,55</b>  | 1.46597502611609e-16 | <b>-0,24</b> | 0.000846135608802876 |
| CHUK   | ENSG00000213341 | <b>-0,34</b> | 1.1178268897534e-06  | <b>0,20</b>  | 0.00625863331816267  |
| CIITA  | ENSG00000179583 | <b>0,16</b>  | 0.0251925400006313   | <b>0,05</b>  | 0.454992654836226    |
| CISH   | ENSG00000114737 | <b>-0,04</b> | 0.623436251380992    | <b>-0,53</b> | 1.83498073104994e-15 |
| CLCF1  | ENSG00000175505 | <b>0,17</b>  | 0.0184926902909362   | <b>-0,49</b> | 9.04654029009691e-13 |
| CNKSR1 | ENSG00000142675 | <b>0,49</b>  | 1.15206168368363e-12 | <b>-0,21</b> | 0.00299979158012222  |
| CNKSR2 | ENSG00000149970 | <b>0,21</b>  | 0.00380327098192265  | <b>0,46</b>  | 1.73974498159781e-11 |
| CNTF   | ENSG00000242689 | <b>-0,38</b> | 8.88862438427588e-08 | <b>-0,15</b> | 0.035450938097936    |
| CNTFR  | ENSG00000122756 | <b>0,37</b>  | 2.04816568631161e-07 | <b>-0,06</b> | 0.411403060567298    |
| COL1A2 | ENSG00000164692 | <b>0,06</b>  | 0.397584704617204    | <b>0,20</b>  | 0.00601987398531924  |
| CRK    | ENSG00000167193 | <b>-0,75</b> | 8.05055390381393e-36 | <b>-0,30</b> | 2.82393030151967e-05 |
| CRKL   | ENSG00000099942 | <b>-0,32</b> | 4.76681209703592e-06 | <b>0,30</b>  | 3.16490373461747e-05 |
| CRLF1  | ENSG00000006016 | <b>0,64</b>  | 2.47341036668506e-23 | <b>0,01</b>  | 0.89934932703081     |
| CSF1   | ENSG00000184371 | <b>0,25</b>  | 0.000403824125722475 | <b>-0,39</b> | 2.98123865451969e-08 |
| CSF1R  | ENSG00000182578 | <b>-0,18</b> | 0.0137113305549515   | <b>0,03</b>  | 0.704893184768505    |
| CSF2   | ENSG00000164400 | <b>0,03</b>  | 0.681839701485133    | <b>-0,33</b> | 4.43750237595565e-06 |
| CSF2RB | ENSG00000100368 | <b>0,13</b>  | 0.0688725900856352   | <b>0,05</b>  | 0.470530770022826    |
| CSF3   | ENSG00000108342 | <b>0,18</b>  | 0.0154185750024194   | <b>-0,36</b> | 2.92319384299176e-07 |
| CSF3R  | ENSG00000119535 | <b>-0,02</b> | 0.827356498428349    | <b>-0,05</b> | 0.48260413478207     |
| CSK    | ENSG00000103653 | <b>0,39</b>  | 3.39924160397455e-08 | <b>-0,21</b> | 0.00320616186254278  |
| CTF1   | ENSG00000150281 | <b>0,06</b>  | 0.374255243047533    | <b>-0,15</b> | 0.0449285995603537   |
| CUL1   | ENSG00000055130 | <b>-0,52</b> | 2.14761458340907e-14 | <b>-0,21</b> | 0.00400553337582581  |
| CUL3   | ENSG00000036257 | <b>-0,46</b> | 2.56155369936478e-11 | <b>0,11</b>  | 0.122519232267966    |
| CXCL1  | ENSG00000163739 | <b>-0,21</b> | 0.00367753408294341  | <b>-0,41</b> | 2.5377874669153e-09  |
| CXCL10 | ENSG00000169245 | <b>-0,20</b> | 0.00635049523593809  | <b>-0,30</b> | 1.90252887758536e-05 |
| CXCL11 | ENSG00000169248 | <b>-0,25</b> | 0.000407303894057176 | <b>-0,23</b> | 0.00109819780946129  |
| CXCL12 | ENSG00000107562 | <b>-0,25</b> | 0.000383990851726459 | <b>-0,39</b> | 2.10479387532965e-08 |
| CXCL14 | ENSG00000145824 | <b>0,00</b>  | 0.980920224019042    | <b>-0,30</b> | 2.02427194060977e-05 |
| CXCL16 | ENSG00000161921 | <b>-0,28</b> | 0.000114844855785013 | <b>-0,50</b> | 2.06541890758647e-13 |
| CXCL17 | ENSG00000189377 | <b>-0,40</b> | 1.28106250427303e-08 | <b>-0,42</b> | 9.1866463267923e-10  |
| CXCL2  | ENSG00000081041 | <b>-0,17</b> | 0.0193860342280525   | <b>-0,47</b> | 7.45811154682921e-12 |
| CXCL3  | ENSG00000163734 | <b>-0,13</b> | 0.0751678973976666   | <b>-0,53</b> | 3.42505660121794e-15 |
| CXCL5  | ENSG00000163735 | <b>-0,35</b> | 9.93191522809374e-07 | <b>-0,44</b> | 1.84244199464914e-10 |
| CXCL6  | ENSG00000124875 | <b>-0,23</b> | 0.00166338197486167  | <b>-0,19</b> | 0.00773373521915048  |
| CXCL8  | ENSG00000169429 | <b>-0,42</b> | 1.12097774486885e-09 | <b>-0,54</b> | 1.55144253234339e-15 |
| CXCL9  | ENSG00000138755 | <b>-0,21</b> | 0.00288462294587905  | <b>-0,21</b> | 0.00355173584180992  |

|         |                 |              |                      |              |                      |
|---------|-----------------|--------------|----------------------|--------------|----------------------|
| CXCR4   | ENSG00000121966 | <b>-0,18</b> | 0.0125262267219206   | <b>0,03</b>  | 0.650330003763597    |
| CXCR5   | ENSG00000160683 | <b>0,34</b>  | 1.14022885829554e-06 | <b>-0,30</b> | 2.11468012073142e-05 |
| CXCR6   | ENSG00000172215 | <b>-0,23</b> | 0.00109499009940793  | <b>-0,15</b> | 0.0406312147914688   |
| DAB2IP  | ENSG00000136848 | <b>0,28</b>  | 7.61443521425966e-05 | <b>-0,41</b> | 3.6488594170386e-09  |
| DDX58   | ENSG00000107201 | <b>-0,42</b> | 9.47228472906936e-10 | <b>-0,23</b> | 0.00110291790660329  |
| DLG4    | ENSG00000132535 | <b>0,54</b>  | 1.23149471987978e-15 | <b>0,61</b>  | 1.18205184310589e-20 |
| DUSP1   | ENSG00000120129 | <b>0,14</b>  | 0.0570076158581769   | <b>-0,23</b> | 0.00143559494779822  |
| DUSP10  | ENSG00000143507 | <b>-0,38</b> | 7.0817711486128e-08  | <b>-0,32</b> | 6.31271011761031e-06 |
| DUSP16  | ENSG00000111266 | <b>-0,51</b> | 5.02361833977153e-14 | <b>-0,18</b> | 0.0109236136489219   |
| DUSP2   | ENSG00000158050 | <b>0,11</b>  | 0.133037817598459    | <b>-0,37</b> | 1.65423665672134e-07 |
| DUSP4   | ENSG00000120875 | <b>-0,42</b> | 2.32293611490365e-09 | <b>-0,54</b> | 1.09789203695076e-15 |
| DUSP5   | ENSG00000138166 | <b>-0,30</b> | 3.24551606542836e-05 | <b>-0,40</b> | 6.65653677018933e-09 |
| DUSP6   | ENSG00000139318 | <b>-0,17</b> | 0.0206498672669411   | <b>-0,29</b> | 5.71289633798277e-05 |
| DUSP7   | ENSG00000164086 | <b>0,57</b>  | 4.05257135265869e-18 | <b>0,03</b>  | 0.716312135057821    |
| DUSP8   | ENSG00000184545 | <b>0,72</b>  | 1.58629569059562e-31 | <b>0,11</b>  | 0.136548053720883    |
| EDA     | ENSG00000158813 | <b>-0,38</b> | 8.51774978205229e-08 | <b>0,33</b>  | 2.3572475846563e-06  |
| EDA2R   | ENSG00000131080 | <b>-0,04</b> | 0.586812672901528    | <b>0,21</b>  | 0.0043740962918577   |
| EDAR    | ENSG00000135960 | <b>-0,39</b> | 2.77433278130626e-08 | <b>-0,30</b> | 3.42712704108932e-05 |
| EDARADD | ENSG00000186197 | <b>0,11</b>  | 0.11663795231865     | <b>0,71</b>  | 3.56169356825958e-31 |
| EGF     | ENSG00000138798 | <b>-0,41</b> | 5.7824858431494e-09  | <b>-0,32</b> | 8.98574152974385e-06 |
| EGFR    | ENSG00000146648 | <b>-0,60</b> | 4.3058782674096e-20  | <b>-0,50</b> | 1.1243564967149e-13  |
| EGR1    | ENSG00000120738 | <b>-0,14</b> | 0.0623343681152722   | <b>-0,22</b> | 0.00280085718660578  |
| EIF2AK2 | ENSG00000055332 | <b>-0,46</b> | 3.30817892243563e-11 | <b>0,15</b>  | 0.0406389192141145   |
| EIF4A1  | ENSG00000161960 | <b>-0,74</b> | 2.31419729734339e-34 | <b>-0,31</b> | 1.32143630545985e-05 |
| EIF4A2  | ENSG00000156976 | <b>-0,20</b> | 0.00481290536003911  | <b>0,30</b>  | 3.25275922543956e-05 |
| EIF4A3  | ENSG00000141543 | <b>-0,58</b> | 1.05148927620302e-18 | <b>-0,20</b> | 0.00611830274315773  |
| EIF4E   | ENSG00000151247 | <b>-0,59</b> | 2.91968333681233e-19 | <b>-0,01</b> | 0.913889836816078    |
| EIF4E2  | ENSG00000135930 | <b>-0,75</b> | 4.96274006533698e-36 | <b>-0,19</b> | 0.0101865175958272   |
| EIF4E3  | ENSG00000163412 | <b>-0,40</b> | 1.13331191181991e-08 | <b>0,27</b>  | 0.000195718528081111 |
| EIF4G1  | ENSG00000114867 | <b>-0,12</b> | 0.100919174736973    | <b>-0,10</b> | 0.148598787003511    |
| EIF4G2  | ENSG00000110321 | <b>-0,66</b> | 1.63482213911667e-25 | <b>-0,10</b> | 0.149164948088084    |
| EIF4G3  | ENSG00000075151 | <b>-0,18</b> | 0.0108499286361439   | <b>0,32</b>  | 7.98161501374028e-06 |
| ERBB2   | ENSG00000141736 | <b>0,06</b>  | 0.409347835376235    | <b>-0,38</b> | 5.87054493238728e-08 |
| ERBB3   | ENSG00000065361 | <b>-0,41</b> | 4.66347012065983e-09 | <b>-0,40</b> | 1.01911321543803e-08 |
| ERBB4   | ENSG00000178568 | <b>-0,17</b> | 0.0211733740474937   | <b>0,35</b>  | 7.20541999998462e-07 |
| EREG    | ENSG00000124882 | <b>-0,40</b> | 1.23180034589255e-08 | <b>-0,28</b> | 9.85874900087042e-05 |
| F13A1   | ENSG00000124491 | <b>-0,13</b> | 0.0726193017982728   | <b>0,47</b>  | 1.08277496324921e-11 |
| FBXW11  | ENSG00000072803 | <b>-0,34</b> | 1.52499677719491e-06 | <b>0,30</b>  | 2.63687140639665e-05 |
| FCGR1A  | ENSG00000150337 | <b>-0,16</b> | 0.0235144840293745   | <b>-0,06</b> | 0.432421826844612    |
| FGA     | ENSG00000171560 | <b>-0,31</b> | 1.56959891589665e-05 | <b>-0,31</b> | 1.34666094371246e-05 |
| FGB     | ENSG00000171564 | <b>-0,25</b> | 0.000378372380822799 | <b>-0,19</b> | 0.0080915117011165   |
| FGF1    | ENSG00000113578 | <b>-0,44</b> | 2.44066913828584e-10 | <b>0,02</b>  | 0.754378968271158    |
| FGF10   | ENSG00000070193 | <b>-0,55</b> | 2.46422122616766e-16 | <b>-0,36</b> | 2.34550805683999e-07 |
| FGF17   | ENSG00000158815 | <b>0,56</b>  | 4.12854930573952e-17 | <b>0,03</b>  | 0.721583744842591    |
| FGF18   | ENSG00000156427 | <b>0,45</b>  | 6.02265824835725e-11 | <b>0,03</b>  | 0.703577358408286    |
| FGF19   | ENSG00000162344 | <b>0,00</b>  | 0.974288497012945    | <b>-0,05</b> | 0.511373306168205    |
| FGF2    | ENSG00000138685 | <b>-0,46</b> | 3.48955204221941e-11 | <b>-0,41</b> | 2.42795689103835e-09 |
| FGF20   | ENSG00000078579 | <b>0,06</b>  | 0.405200564211745    | <b>-0,06</b> | 0.434892270569       |
| FGF5    | ENSG00000138675 | <b>-0,34</b> | 1.10199987998084e-06 | <b>-0,12</b> | 0.110867479809079    |
| FGF7    | ENSG00000140285 | <b>-0,34</b> | 1.68361060791868e-06 | <b>-0,23</b> | 0.00144647655547454  |
| FGF9    | ENSG00000102678 | <b>0,19</b>  | 0.00714864285943579  | <b>0,64</b>  | 1.37001729738829e-23 |
| FGFR1   | ENSG00000077782 | <b>0,22</b>  | 0.00183201446032256  | <b>0,06</b>  | 0.394943323990646    |
| FGFR2   | ENSG00000066468 | <b>-0,42</b> | 1.04165032592503e-09 | <b>-0,29</b> | 5.36124292340821e-05 |
| FGFR3   | ENSG00000068078 | <b>0,28</b>  | 8.57267080027185e-05 | <b>-0,32</b> | 7.7194370713869e-06  |
| FGFR4   | ENSG00000160867 | <b>0,52</b>  | 1.62775920503534e-14 | <b>-0,18</b> | 0.0145844884117514   |
| FGG     | ENSG00000171557 | <b>-0,29</b> | 3.76327983815819e-05 | <b>-0,32</b> | 8.44356327212361e-06 |
| FLNB    | ENSG00000136068 | <b>-0,43</b> | 6.23983462640779e-10 | <b>0,02</b>  | 0.793107892842371    |
| FLT3    | ENSG00000122025 | <b>-0,38</b> | 4.27464393275612e-08 | <b>-0,42</b> | 1.62298966237945e-09 |

|          |                 |              |                      |              |                      |
|----------|-----------------|--------------|----------------------|--------------|----------------------|
| FLT3LG   | ENSG00000090554 | <b>0,62</b>  | 5.53901359587075e-22 | <b>-0,08</b> | 0.275421422615208    |
| FN1      | ENSG00000115414 | <b>-0,10</b> | 0.148416945251089    | <b>0,15</b>  | 0.0355965389095339   |
| FOS      | ENSG00000170345 | <b>0,07</b>  | 0.319430866802173    | <b>-0,10</b> | 0.171969344062599    |
| FOXO1    | ENSG00000150907 | <b>-0,09</b> | 0.224808866156479    | <b>0,51</b>  | 2.87947047397879e-14 |
| FOXO3    | ENSG00000118689 | <b>-0,51</b> | 3.26633890967499e-14 | <b>-0,28</b> | 0.000115347596844021 |
| FPR1     | ENSG00000171051 | <b>-0,29</b> | 4.06826197094733e-05 | <b>-0,04</b> | 0.564032146368334    |
| FRS2     | ENSG00000166225 | <b>-0,44</b> | 1.88320491524232e-10 | <b>0,14</b>  | 0.0500883303385876   |
| FRS3     | ENSG00000137218 | <b>0,66</b>  | 2.85439463413742e-25 | <b>0,03</b>  | 0.694289602025594    |
| FSCN1    | ENSG00000075618 | <b>0,67</b>  | 3.42132863793156e-26 | <b>0,03</b>  | 0.714942547253353    |
| FYN      | ENSG00000010810 | <b>-0,11</b> | 0.115624618811205    | <b>0,36</b>  | 4.65577043086155e-07 |
| GAB2     | ENSG00000033327 | <b>-0,34</b> | 1.31467093679976e-06 | <b>-0,07</b> | 0.367957087429214    |
| GATA3    | ENSG00000107485 | <b>0,07</b>  | 0.316648697971256    | <b>-0,19</b> | 0.0069102554727463   |
| GBP1     | ENSG00000117228 | <b>-0,54</b> | 3.72749092694847e-16 | <b>-0,39</b> | 1.62642204239511e-08 |
| GBP2     | ENSG00000162645 | <b>-0,48</b> | 2.60404210434064e-12 | <b>-0,48</b> | 2.35061797063963e-12 |
| GBP3     | ENSG00000117226 | <b>-0,33</b> | 3.50073784638969e-06 | <b>-0,26</b> | 0.000333079671380302 |
| GBP4     | ENSG00000162654 | <b>-0,20</b> | 0.00599815698168757  | <b>-0,01</b> | 0.87584477265925     |
| GBP5     | ENSG00000154451 | <b>-0,32</b> | 8.76934311592565e-06 | <b>-0,24</b> | 0.000648027424968863 |
| GDNF     | ENSG00000168621 | <b>-0,17</b> | 0.0163307015225077   | <b>-0,13</b> | 0.0772094121907166   |
| GFRA1    | ENSG00000151892 | <b>-0,38</b> | 6.71371640309965e-08 | <b>0,16</b>  | 0.0302918587636134   |
| GFRA2    | ENSG00000168546 | <b>0,00</b>  | 0.9708424449324579   | <b>-0,13</b> | 0.0820891720087893   |
| GFRA3    | ENSG00000146013 | <b>-0,19</b> | 0.00819200193096893  | <b>-0,29</b> | 5.35970964473786e-05 |
| GHR      | ENSG00000112964 | <b>-0,32</b> | 8.68237515685064e-06 | <b>0,29</b>  | 6.13402030775807e-05 |
| GRB2     | ENSG00000177885 | <b>-0,33</b> | 4.11133454298968e-06 | <b>0,00</b>  | 0.988232456850839    |
| GRIN1    | ENSG00000176884 | <b>0,53</b>  | 2.1166464702785e-15  | <b>0,21</b>  | 0.00357098649132247  |
| GRIN2A   | ENSG00000183454 | <b>-0,08</b> | 0.261036892101587    | <b>0,38</b>  | 7.441138253032e-08   |
| GRIN2C   | ENSG00000161509 | <b>0,28</b>  | 0.000100751990510586 | <b>-0,05</b> | 0.492181515814096    |
| GRIN2D   | ENSG00000105464 | <b>0,60</b>  | 5.68511513929615e-20 | <b>0,19</b>  | 0.00965993608863983  |
| HAVCR2   | ENSG00000135077 | <b>-0,30</b> | 3.37417972950292e-05 | <b>-0,12</b> | 0.096150386924099    |
| HBEGF    | ENSG00000113070 | <b>-0,39</b> | 3.46525375311741e-08 | <b>-0,33</b> | 2.64354643526928e-06 |
| HCK      | ENSG00000101336 | <b>-0,24</b> | 0.000667377904420875 | <b>-0,03</b> | 0.634449615819388    |
| HERC5    | ENSG00000138646 | <b>0,05</b>  | 0.506459355392549    | <b>0,50</b>  | 2.87793406986351e-13 |
| HGF      | ENSG00000019991 | <b>-0,30</b> | 1.93213994726155e-05 | <b>-0,09</b> | 0.214792319155701    |
| HIF1A    | ENSG00000100644 | <b>-0,57</b> | 1.31809194555056e-17 | <b>-0,30</b> | 2.94551704669528e-05 |
| HIST1H3D | ENSG00000197409 | <b>0,43</b>  | 6.94604895681224e-10 | <b>-0,15</b> | 0.0407650591691055   |
| HLA-A    | ENSG00000206503 | <b>0,41</b>  | 3.17676782898581e-09 | <b>0,05</b>  | 0.501993587554691    |
| HLA-B    | ENSG00000234745 | <b>-0,07</b> | 0.321245752822301    | <b>-0,37</b> | 1.35154815601213e-07 |
| HLA-C    | ENSG00000204525 | <b>0,22</b>  | 0.00177092256548731  | <b>-0,05</b> | 0.493859111819826    |
| HLA-DPA1 | ENSG00000231389 | <b>-0,33</b> | 3.48390737616717e-06 | <b>-0,14</b> | 0.0625700888034012   |
| HLA-DPB1 | ENSG00000223865 | <b>-0,14</b> | 0.0500989017843944   | <b>-0,29</b> | 6.04620119758697e-05 |
| HLA-DQA1 | ENSG00000196735 | <b>-0,35</b> | 7.32409952502228e-07 | <b>-0,06</b> | 0.395299635736331    |
| HLA-DQB1 | ENSG00000179344 | <b>-0,16</b> | 0.0281057297508137   | <b>-0,09</b> | 0.220240452128911    |
| HLA-DRA  | ENSG00000204287 | <b>-0,49</b> | 9.0078408324313e-13  | <b>-0,17</b> | 0.0198061579232227   |
| HLA-DRB1 | ENSG00000196126 | <b>-0,34</b> | 1.84758362592658e-06 | <b>-0,14</b> | 0.0539708285037983   |
| HLA-DRB5 | ENSG00000198502 | <b>-0,22</b> | 0.00268285198387145  | <b>-0,11</b> | 0.127383172104309    |
| HLA-E    | ENSG00000204592 | <b>0,16</b>  | 0.0291932833068203   | <b>-0,28</b> | 9.86111154029346e-05 |
| HLA-F    | ENSG00000204642 | <b>0,48</b>  | 3.0844601875437e-12  | <b>-0,25</b> | 0.000591139503654884 |
| HLA-G    | ENSG00000204632 | <b>0,05</b>  | 0.482261735708689    | <b>-0,31</b> | 9.9969053922563e-06  |
| HLA-H    | ENSG00000206341 | <b>0,18</b>  | 0.0140794221492256   | <b>0,09</b>  | 0.239411023029804    |
| HMOX1    | ENSG00000100292 | <b>0,09</b>  | 0.201600022912768    | <b>-0,07</b> | 0.326888502930445    |
| HRAS     | ENSG00000174775 | <b>0,55</b>  | 2.46001885119236e-16 | <b>0,06</b>  | 0.405352115542166    |
| HSP90AA1 | ENSG00000080824 | <b>-0,39</b> | 3.46285886000608e-08 | <b>0,10</b>  | 0.167349914358279    |
| HSP90B1  | ENSG00000166598 | <b>-0,30</b> | 2.46119325311968e-05 | <b>0,00</b>  | 0.96229049370025     |
| HSPA8    | ENSG00000109971 | <b>-0,53</b> | 3.69698672886195e-15 | <b>0,05</b>  | 0.483995357792431    |
| ICAM1    | ENSG00000090339 | <b>-0,26</b> | 0.000310326558739677 | <b>-0,38</b> | 7.74971946141322e-08 |
| IFI27    | ENSG00000165949 | <b>0,06</b>  | 0.417463327642741    | <b>-0,18</b> | 0.012460364710499    |
| IFI30    | ENSG00000216490 | <b>0,08</b>  | 0.295313404702536    | <b>-0,12</b> | 0.110463236495231    |
| IFI35    | ENSG00000068079 | <b>0,08</b>  | 0.291372865987342    | <b>0,02</b>  | 0.766252150166224    |
| IFI6     | ENSG00000126709 | <b>0,60</b>  | 2.28537513168798e-20 | <b>0,14</b>  | 0.0534002297273771   |

|         |                 |              |                      |              |                      |
|---------|-----------------|--------------|----------------------|--------------|----------------------|
| IFIT1   | ENSG00000185745 | <b>-0,10</b> | 0.168179329055682    | <b>0,13</b>  | 0.0790116548077697   |
| IFIT2   | ENSG00000119922 | <b>-0,39</b> | 1.81926495916762e-08 | <b>-0,37</b> | 1.77032737388667e-07 |
| IFIT3   | ENSG00000119917 | <b>-0,46</b> | 1.83893380809121e-11 | <b>-0,36</b> | 2.66527425198204e-07 |
| IFITM1  | ENSG00000185885 | <b>-0,12</b> | 0.0868732507529924   | <b>-0,10</b> | 0.182545759924403    |
| IFITM2  | ENSG00000185201 | <b>-0,08</b> | 0.259989669232281    | <b>-0,40</b> | 6.3595868417778e-09  |
| IFITM3  | ENSG00000142089 | <b>0,18</b>  | 0.0128806254229862   | <b>-0,45</b> | 4.72199476985729e-11 |
| IFNAR1  | ENSG00000142166 | <b>-0,63</b> | 1.93927974544317e-22 | <b>-0,26</b> | 0.000304375990188567 |
| IFNAR2  | ENSG00000159110 | <b>-0,66</b> | 1.12799580148387e-25 | <b>-0,42</b> | 1.9875301607214e-09  |
| IFNGR1  | ENSG00000027697 | <b>-0,61</b> | 9.20222557434055e-21 | <b>-0,47</b> | 6.89646309761597e-12 |
| IFNGR2  | ENSG00000159128 | <b>-0,51</b> | 2.75065468913454e-14 | <b>-0,54</b> | 4.3989143154181e-16  |
| IFNLR1  | ENSG00000185436 | <b>-0,31</b> | 1.556330238438e-05   | <b>-0,13</b> | 0.0754043913196151   |
| IGHG1   | ENSG00000211896 | <b>-0,01</b> | 0.877749134991903    | <b>-0,14</b> | 0.0566350368286664   |
| IKBKB   | ENSG00000104365 | <b>0,00</b>  | 0.955333101431861    | <b>-0,29</b> | 6.32388919004456e-05 |
| IL10    | ENSG00000136634 | <b>-0,35</b> | 6.62961598191475e-07 | <b>-0,14</b> | 0.0481751827565998   |
| IL10RA  | ENSG00000110324 | <b>0,18</b>  | 0.0125206546242096   | <b>0,57</b>  | 3.4786531533015e-18  |
| IL10RB  | ENSG00000243646 | <b>-0,42</b> | 9.56550701097362e-10 | <b>-0,38</b> | 5.57365766134934e-08 |
| IL11    | ENSG00000095752 | <b>-0,07</b> | 0.365283087770948    | <b>-0,32</b> | 7.52132567074106e-06 |
| IL11RA  | ENSG00000137070 | <b>0,39</b>  | 1.96444396848656e-08 | <b>-0,07</b> | 0.319166387616187    |
| IL12A   | ENSG00000168811 | <b>0,00</b>  | 0.991110726408829    | <b>-0,38</b> | 7.9570963243035e-08  |
| IL12RB1 | ENSG00000096996 | <b>0,23</b>  | 0.00122230356369201  | <b>0,15</b>  | 0.0390269569523579   |
| IL12RB2 | ENSG00000081985 | <b>-0,33</b> | 2.71023299394142e-06 | <b>-0,30</b> | 1.96597294538937e-05 |
| IL13RA1 | ENSG00000131724 | <b>-0,53</b> | 3.74050990258939e-15 | <b>-0,02</b> | 0.760937217074865    |
| IL13RA2 | ENSG00000123496 | <b>-0,31</b> | 1.25502366462693e-05 | <b>-0,18</b> | 0.0109951027134327   |
| IL15    | ENSG00000164136 | <b>-0,22</b> | 0.00267988795387774  | <b>-0,70</b> | 6.9321397775139e-29  |
| IL15RA  | ENSG00000134470 | <b>0,02</b>  | 0.776052277699761    | <b>-0,58</b> | 2.89052913197342e-18 |
| IL16    | ENSG00000172349 | <b>-0,06</b> | 0.424249139118085    | <b>-0,01</b> | 0.857373004345726    |
| IL17D   | ENSG00000172458 | <b>0,35</b>  | 6.02171551746405e-07 | <b>0,30</b>  | 1.98213111798617e-05 |
| IL17RA  | ENSG00000177663 | <b>-0,08</b> | 0.258794478145161    | <b>0,12</b>  | 0.0878496665060153   |
| IL17RB  | ENSG00000056736 | <b>0,26</b>  | 0.000214422555033613 | <b>0,01</b>  | 0.922246113753298    |
| IL17RC  | ENSG00000163702 | <b>0,71</b>  | 2.46898296774402e-30 | <b>0,10</b>  | 0.188557956787351    |
| IL17RD  | ENSG00000144730 | <b>-0,51</b> | 3.5797286312822e-14  | <b>-0,37</b> | 1.06999737368533e-07 |
| IL17RE  | ENSG00000163701 | <b>0,10</b>  | 0.187447665640803    | <b>-0,03</b> | 0.714042088606822    |
| IL18    | ENSG00000150782 | <b>-0,27</b> | 0.000193778534666499 | <b>-0,32</b> | 4.62993766015631e-06 |
| IL18BP  | ENSG00000137496 | <b>0,66</b>  | 1.94215147758583e-25 | <b>-0,03</b> | 0.668847876969088    |
| IL18R1  | ENSG00000115604 | <b>-0,14</b> | 0.0532949380420931   | <b>-0,29</b> | 3.72886234460458e-05 |
| IL18RAP | ENSG00000115607 | <b>0,03</b>  | 0.73091966474103     | <b>-0,32</b> | 6.22477610834922e-06 |
| IL1A    | ENSG00000115008 | <b>-0,32</b> | 8.45224131569533e-06 | <b>-0,30</b> | 2.66784939150809e-05 |
| IL1B    | ENSG00000125538 | <b>-0,35</b> | 7.39860946753494e-07 | <b>-0,35</b> | 8.80488246544108e-07 |
| IL1R1   | ENSG00000115594 | <b>-0,54</b> | 1.42662150131136e-15 | <b>-0,47</b> | 7.81353200584664e-12 |
| IL1R2   | ENSG00000115590 | <b>-0,24</b> | 0.000893563792501214 | <b>-0,37</b> | 1.98110558437503e-07 |
| IL1RAP  | ENSG00000196083 | <b>-0,55</b> | 2.20439359523922e-16 | <b>-0,41</b> | 3.36281933133914e-09 |
| IL1RL1  | ENSG00000115602 | <b>-0,22</b> | 0.00213247658506211  | <b>-0,23</b> | 0.00114694442430058  |
| IL1RL2  | ENSG00000115598 | <b>-0,33</b> | 2.81793629147517e-06 | <b>0,00</b>  | 0.998551812062902    |
| IL1RN   | ENSG00000136689 | <b>-0,28</b> | 7.23573823279185e-05 | <b>-0,34</b> | 1.91738457528817e-06 |
| IL20RA  | ENSG00000016402 | <b>0,09</b>  | 0.193573144428191    | <b>0,41</b>  | 3.82020705217257e-09 |
| IL20RB  | ENSG00000174564 | <b>0,01</b>  | 0.867333638448443    | <b>-0,22</b> | 0.0023392089228126   |
| IL21R   | ENSG00000103522 | <b>0,37</b>  | 1.34228519291631e-07 | <b>0,06</b>  | 0.427981985859474    |
| IL22RA1 | ENSG00000142677 | <b>-0,30</b> | 3.08367034022956e-05 | <b>-0,48</b> | 2.87726914589897e-12 |
| IL23A   | ENSG00000110944 | <b>-0,03</b> | 0.644645797902959    | <b>-0,45</b> | 9.67115060054828e-11 |
| IL23R   | ENSG00000162594 | <b>-0,22</b> | 0.00257454489699698  | <b>0,22</b>  | 0.00182712979345897  |
| IL24    | ENSG00000162892 | <b>-0,29</b> | 3.79070970091223e-05 | <b>-0,17</b> | 0.0192959023633358   |
| IL27RA  | ENSG00000104998 | <b>-0,10</b> | 0.162994150074083    | <b>-0,40</b> | 8.86323974097409e-09 |
| IL2RB   | ENSG00000100385 | <b>-0,18</b> | 0.0144431332335081   | <b>-0,26</b> | 0.000343963819283761 |
| IL2RG   | ENSG00000147168 | <b>-0,40</b> | 7.15846989614708e-09 | <b>-0,24</b> | 0.000732077598678967 |
| IL31RA  | ENSG00000164509 | <b>-0,29</b> | 5.37242335659899e-05 | <b>-0,16</b> | 0.0259961120033516   |
| IL32    | ENSG00000008517 | <b>-0,18</b> | 0.010515760811482    | <b>-0,42</b> | 2.06121281580945e-09 |
| IL33    | ENSG00000137033 | <b>-0,39</b> | 3.03371256792028e-08 | <b>-0,42</b> | 9.27237350542814e-10 |
| IL34    | ENSG00000157368 | <b>0,28</b>  | 9.03762598218732e-05 | <b>-0,16</b> | 0.0261104425619999   |

|          |                 |              |                      |              |                       |
|----------|-----------------|--------------|----------------------|--------------|-----------------------|
| IL4I1    | ENSG00000104951 | <b>0,36</b>  | 3.7034875200183e-07  | <b>0,00</b>  | 0.976900621332181     |
| IL4R     | ENSG00000077238 | <b>-0,24</b> | 0.000698199612902479 | <b>-0,60</b> | 9.01546609244505e-20  |
| IL5RA    | ENSG00000091181 | <b>0,03</b>  | 0.700688253503954    | <b>0,18</b>  | 0.0131308852385535    |
| IL6      | ENSG00000136244 | <b>-0,38</b> | 6.23851661010328e-08 | <b>-0,54</b> | 1.04547716421021e-15  |
| IL6R     | ENSG00000160712 | <b>0,24</b>  | 0.00098114997789636  | <b>0,36</b>  | 3.88431360002777e-07  |
| IL6ST    | ENSG00000134352 | <b>-0,75</b> | 3.44003434019804e-35 | <b>-0,27</b> | 0.000126298974719615  |
| IL6STP1  | ENSG00000227018 | <b>0,22</b>  | 0.00182667155608608  | <b>-0,05</b> | 0.467673423794732     |
| IL7      | ENSG00000104432 | <b>-0,13</b> | 0.0689954954170196   | <b>-0,11</b> | 0.125212694452644     |
| IL7R     | ENSG00000168685 | <b>-0,39</b> | 2.05832329971e-08    | <b>-0,28</b> | 9.30815288694941e-05  |
| ILD1R1   | ENSG00000145103 | <b>-0,26</b> | 0.000339162859106476 | <b>-0,17</b> | 0.0212016910487067    |
| ILD1R2   | ENSG00000143195 | <b>0,16</b>  | 0.0255808337937447   | <b>0,63</b>  | 1.23206894912374e-22  |
| ILF2     | ENSG00000143621 | <b>-0,72</b> | 3.39653681088795e-32 | <b>-0,15</b> | 0.0421147591165147    |
| ILF3     | ENSG00000129351 | <b>0,27</b>  | 0.000177465020068769 | <b>-0,16</b> | 0.0284876796290236    |
| ILF3-AS1 | ENSG00000267100 | <b>0,29</b>  | 3.90272388294899e-05 | <b>0,24</b>  | 0.00104592585053249   |
| ILK      | ENSG00000166333 | <b>-0,54</b> | 4.93156949548619e-16 | <b>-0,14</b> | 0.0624471459452703    |
| ILKAP    | ENSG00000132323 | <b>0,36</b>  | 2.4144066299645e-07  | <b>-0,17</b> | 0.0198846575309082    |
| ILVBL    | ENSG00000105135 | <b>0,66</b>  | 2.61039099230088e-25 | <b>-0,04</b> | 0.592512226701362     |
| INPP5D   | ENSG00000168918 | <b>-0,03</b> | 0.680907530145568    | <b>0,13</b>  | 0.0686788270498966    |
| INPPL1   | ENSG00000165458 | <b>0,40</b>  | 8.76495288213761e-09 | <b>-0,03</b> | 0.68995585681913      |
| IP6K2    | ENSG00000068745 | <b>0,30</b>  | 2.25135147047044e-05 | <b>0,07</b>  | 0.324641430677502     |
| IQGAP1   | ENSG00000140575 | <b>-0,53</b> | 3.21739049189942e-15 | <b>0,02</b>  | 0.784677937699159     |
| IRAK1    | ENSG00000184216 | <b>0,50</b>  | 2.20514607971888e-13 | <b>-0,12</b> | 0.103457118518497     |
| IRAK2    | ENSG00000134070 | <b>-0,35</b> | 6.95029660032743e-07 | <b>-0,43</b> | 7.01973501615173e-10  |
| IRAK3    | ENSG00000090376 | <b>-0,39</b> | 2.47592964601667e-08 | <b>-0,13</b> | 0.0726301846659023    |
| IRAK4    | ENSG00000198001 | <b>-0,47</b> | 5.89109885371024e-12 | <b>-0,07</b> | 0.309402333728931     |
| IRF1     | ENSG00000125347 | <b>-0,22</b> | 0.00218498430516907  | <b>-0,45</b> | 6.8595246836266e-11   |
| IRF2     | ENSG00000168310 | <b>-0,53</b> | 2.64551578741172e-15 | <b>-0,12</b> | 0.0860556588295567    |
| IRF3     | ENSG00000126456 | <b>0,62</b>  | 1.55820327947092e-21 | <b>-0,13</b> | 0.0674161842953076    |
| IRF4     | ENSG00000137265 | <b>-0,37</b> | 1.1784521145191e-07  | <b>-0,50</b> | 3.2774625407313e-13   |
| IRF5     | ENSG00000128604 | <b>0,52</b>  | 6.57680600283766e-15 | <b>-0,13</b> | 0.0848245154461347    |
| IRF6     | ENSG00000117595 | <b>-0,56</b> | 4.31345058997722e-17 | <b>0,07</b>  | 0.317195808715754     |
| IRF7     | ENSG00000185507 | <b>0,66</b>  | 2.2146313704963e-25  | <b>-0,12</b> | 0.108319133878486     |
| IRF8     | ENSG00000140968 | <b>-0,17</b> | 0.0189482704504927   | <b>-0,20</b> | 0.00606151359148182   |
| IRF9     | ENSG00000213928 | <b>-0,01</b> | 0.927355270888246    | <b>-0,11</b> | 0.13027341850353      |
| IRS1     | ENSG00000169047 | <b>0,19</b>  | 0.00779396677946712  | <b>-0,36</b> | 2.89957043440865e-07  |
| IRS2     | ENSG00000185950 | <b>0,26</b>  | 0.000226329855985828 | <b>0,23</b>  | 0.00164737210953704   |
| ISG15    | ENSG00000187608 | <b>0,61</b>  | 3.31669997958626e-21 | <b>-0,13</b> | 0.0836352099427672    |
| ISG20    | ENSG00000172183 | <b>0,40</b>  | 1.36808822637563e-08 | <b>-0,27</b> | 0.000146216702121402  |
| ITGA2B   | ENSG00000005961 | <b>0,36</b>  | 3.40895296839718e-07 | <b>-0,07</b> | 0.360035315947675     |
| ITGAM    | ENSG00000169896 | <b>-0,25</b> | 0.000595098079308897 | <b>-0,39</b> | 3.24725303031618e-08  |
| ITGAX    | ENSG00000140678 | <b>-0,10</b> | 0.184469724830344    | <b>-0,31</b> | 1.00793506347633e-05  |
| ITGB1    | ENSG00000150093 | <b>-0,70</b> | 1.15592737610596e-29 | <b>-0,30</b> | 2.343159583000453e-05 |
| ITGB2    | ENSG00000160255 | <b>0,11</b>  | 0.115161320399373    | <b>-0,07</b> | 0.302669643195739     |
| ITGB3    | ENSG00000259207 | <b>-0,26</b> | 0.000233543787175904 | <b>0,19</b>  | 0.00963725695924336   |
| JAK1     | ENSG00000162434 | <b>-0,52</b> | 1.21965899014069e-14 | <b>-0,17</b> | 0.0181285138677532    |
| JAK2     | ENSG00000096968 | <b>-0,21</b> | 0.00293620050676593  | <b>0,31</b>  | 1.15950395778076e-05  |
| JAK3     | ENSG00000105639 | <b>0,16</b>  | 0.0254759799124599   | <b>-0,12</b> | 0.10278525129845      |
| JUNB     | ENSG00000171223 | <b>0,64</b>  | 7.67212510391768e-24 | <b>-0,12</b> | 0.102603877780216     |
| KBTBD7   | ENSG00000120696 | <b>0,00</b>  | 0.986803472005442    | <b>0,57</b>  | 4.26627095608914e-18  |
| KIT      | ENSG00000157404 | <b>-0,32</b> | 6.06911145992919e-06 | <b>-0,14</b> | 0.0548835554504869    |
| KITLG    | ENSG00000049130 | <b>-0,59</b> | 2.75247625001181e-19 | <b>-0,24</b> | 0.000939067200012976  |
| KL       | ENSG00000133116 | <b>-0,09</b> | 0.206308778408487    | <b>0,56</b>  | 2.74952829375224e-17  |
| KLB      | ENSG00000134962 | <b>-0,14</b> | 0.0588452193828641   | <b>0,15</b>  | 0.0368329413312485    |
| KPNA1    | ENSG00000114030 | <b>-0,56</b> | 2.77776469206779e-17 | <b>0,04</b>  | 0.59372479604011      |
| KPNA2    | ENSG00000182481 | <b>-0,61</b> | 7.6938482526533e-21  | <b>-0,08</b> | 0.286337600973617     |
| KPNA3    | ENSG00000102753 | <b>-0,60</b> | 6.51895522566435e-20 | <b>-0,15</b> | 0.0332375772025721    |
| KPNA4    | ENSG00000186432 | <b>-0,55</b> | 1.12461451997208e-16 | <b>-0,26</b> | 0.000223376112058276  |
| KPNA5    | ENSG00000196911 | <b>0,15</b>  | 0.0416289471735843   | <b>0,42</b>  | 1.22578310365348e-09  |

|         |                 |              |                      |              |                      |
|---------|-----------------|--------------|----------------------|--------------|----------------------|
| KPNA7   | ENSG00000185467 | <b>-0,32</b> | 7.63486624903092e-06 | <b>-0,46</b> | 1.44370295296161e-11 |
| KPNB1   | ENSG00000108424 | <b>-0,69</b> | 1.63870755330394e-28 | <b>0,00</b>  | 0.951373334868211    |
| KRAS    | ENSG00000133703 | <b>-0,67</b> | 5.23274226421398e-26 | <b>-0,14</b> | 0.0467193743947844   |
| KSR1    | ENSG00000141068 | <b>-0,10</b> | 0.170705294008302    | <b>-0,09</b> | 0.197240330825575    |
| KSR2    | ENSG00000171435 | <b>-0,11</b> | 0.13610262226458     | <b>0,57</b>  | 4.82254697579913e-18 |
| LAMA5   | ENSG00000130702 | <b>0,70</b>  | 1.89977734364957e-29 | <b>-0,04</b> | 0.619628551027396    |
| LAMTOR2 | ENSG00000116586 | <b>0,07</b>  | 0.30320300443563     | <b>-0,19</b> | 0.00783042584098862  |
| LAMTOR3 | ENSG00000109270 | <b>-0,48</b> | 3.19905307693503e-12 | <b>0,06</b>  | 0.44713511686235     |
| LAT     | ENSG00000213658 | <b>0,43</b>  | 3.55290622637628e-10 | <b>-0,19</b> | 0.00780893729859522  |
| LBP     | ENSG00000129988 | <b>-0,31</b> | 1.41177897209494e-05 | <b>-0,36</b> | 4.62292072031325e-07 |
| LCK     | ENSG00000182866 | <b>-0,15</b> | 0.0353462625797426   | <b>-0,23</b> | 0.00136232130345569  |
| LCN2    | ENSG00000148346 | <b>-0,02</b> | 0.78839820497184     | <b>-0,43</b> | 8.31216146093399e-10 |
| LGALS9  | ENSG00000168961 | <b>-0,24</b> | 0.000649493932591455 | <b>-0,41</b> | 6.19081511091341e-09 |
| LIF     | ENSG00000128342 | <b>-0,05</b> | 0.482819781309866    | <b>-0,45</b> | 6.38650230162e-11    |
| LIFR    | ENSG00000113594 | <b>-0,64</b> | 2.66231348605376e-23 | <b>-0,42</b> | 1.55726367986194e-09 |
| LTA     | ENSG00000226979 | <b>0,11</b>  | 0.115156450378494    | <b>-0,07</b> | 0.32644901266702     |
| LTB     | ENSG00000227507 | <b>0,23</b>  | 0.00158753042490447  | <b>-0,20</b> | 0.00452746806166365  |
| LTBR    | ENSG00000111321 | <b>0,47</b>  | 7.46962476537229e-12 | <b>-0,15</b> | 0.0394906107635093   |
| LYN     | ENSG00000254087 | <b>-0,60</b> | 9.33987560128866e-20 | <b>-0,54</b> | 1.34097702010841e-15 |
| MAOA    | ENSG00000189221 | <b>-0,46</b> | 1.69661508782793e-11 | <b>0,04</b>  | 0.540401251319004    |
| MAP2K1  | ENSG00000169032 | <b>-0,42</b> | 1.0089549299884e-09  | <b>-0,13</b> | 0.0641132819324937   |
| MAP2K2  | ENSG00000126934 | <b>0,66</b>  | 1.17674104864783e-25 | <b>0,00</b>  | 0.958168479966848    |
| MAP2K4  | ENSG00000065559 | <b>-0,62</b> | 1.34976778554994e-21 | <b>-0,07</b> | 0.364097650238115    |
| MAP2K6  | ENSG00000108984 | <b>-0,40</b> | 1.53752344947262e-08 | <b>0,19</b>  | 0.00843758230584174  |
| MAP3K11 | ENSG00000173327 | <b>0,64</b>  | 3.91960507895763e-23 | <b>-0,08</b> | 0.276514101965175    |
| MAP3K14 | ENSG00000006062 | <b>0,46</b>  | 1.93455883792861e-11 | <b>-0,23</b> | 0.00161677069109988  |
| MAP3K3  | ENSG00000198909 | <b>0,19</b>  | 0.00723584433967179  | <b>-0,24</b> | 0.00070182737795194  |
| MAP3K7  | ENSG00000135341 | <b>-0,35</b> | 6.39003437413233e-07 | <b>-0,01</b> | 0.867092351786451    |
| MAP3K8  | ENSG00000107968 | <b>-0,24</b> | 0.000771602514091049 | <b>-0,43</b> | 5.60752233400665e-10 |
| MAPK1   | ENSG00000100030 | <b>-0,60</b> | 2.99200936810869e-20 | <b>0,08</b>  | 0.251282465884628    |
| MAPK3   | ENSG00000102882 | <b>0,36</b>  | 2.87917061872028e-07 | <b>0,30</b>  | 2.0009180219269e-05  |
| MARK3   | ENSG00000075413 | <b>-0,52</b> | 1.00512518326643e-14 | <b>-0,31</b> | 1.59263964646641e-05 |
| MCL1    | ENSG00000143384 | <b>-0,62</b> | 2.55283843795004e-21 | <b>-0,52</b> | 1.22181414236806e-14 |
| MET     | ENSG00000105976 | <b>-0,51</b> | 3.38581637335033e-14 | <b>-0,45</b> | 6.2958833509714e-11  |
| MID1    | ENSG00000101871 | <b>-0,53</b> | 1.98427652752285e-15 | <b>-0,43</b> | 4.58300749788245e-10 |
| MMP1    | ENSG00000196611 | <b>-0,42</b> | 1.24415407656481e-09 | <b>-0,28</b> | 7.22680920601027e-05 |
| MMP2    | ENSG00000087245 | <b>-0,04</b> | 0.566889346600683    | <b>-0,12</b> | 0.086433619869771    |
| MMP3    | ENSG00000149968 | <b>-0,31</b> | 1.34277874227605e-05 | <b>-0,29</b> | 5.77960404913741e-05 |
| MMP9    | ENSG00000100985 | <b>0,37</b>  | 1.19306251744215e-07 | <b>0,00</b>  | 0.959604944654703    |
| MT2A    | ENSG00000125148 | <b>0,58</b>  | 1.71821744569472e-18 | <b>-0,14</b> | 0.049420713386341    |
| MUC1    | ENSG00000185499 | <b>-0,15</b> | 0.0355048427511423   | <b>-0,36</b> | 4.62149623156673e-07 |
| MX1     | ENSG00000157601 | <b>-0,18</b> | 0.015182873912748    | <b>-0,26</b> | 0.000298574134706061 |
| MX2     | ENSG00000183486 | <b>-0,20</b> | 0.00461039956638195  | <b>-0,20</b> | 0.0065061668848554   |
| MYC     | ENSG00000136997 | <b>-0,17</b> | 0.0168645538571789   | <b>-0,49</b> | 3.93334794486251e-13 |
| MYD88   | ENSG00000172936 | <b>-0,63</b> | 1.30792485750974e-22 | <b>-0,47</b> | 7.90972736361841e-12 |
| NCAM1   | ENSG00000149294 | <b>-0,05</b> | 0.490859806182678    | <b>0,47</b>  | 1.21484470358627e-11 |
| NDC1    | ENSG00000058804 | <b>-0,66</b> | 4.09127682020578e-25 | <b>-0,26</b> | 0.000335425175741885 |
| NDN     | ENSG00000182636 | <b>0,70</b>  | 4.80593322642305e-29 | <b>0,48</b>  | 1.44946504495289e-12 |
| NEDD4   | ENSG00000069869 | <b>-0,66</b> | 2.13251434405689e-25 | <b>-0,26</b> | 0.000313731354862089 |
| NF1     | ENSG00000196712 | <b>-0,39</b> | 2.28684008877139e-08 | <b>0,20</b>  | 0.00551045757259773  |
| NFKB1   | ENSG00000109320 | <b>-0,59</b> | 1.41337345847154e-19 | <b>-0,40</b> | 1.27178951836757e-08 |
| NFKB2   | ENSG00000077150 | <b>0,22</b>  | 0.00270211457539767  | <b>-0,42</b> | 1.95754158193685e-09 |
| NOD1    | ENSG00000106100 | <b>0,31</b>  | 1.28556623781801e-05 | <b>-0,16</b> | 0.0233950677883959   |
| NOD2    | ENSG00000167207 | <b>-0,16</b> | 0.0271555303549858   | <b>-0,40</b> | 1.19593954178795e-08 |
| NOS2    | ENSG00000007171 | <b>0,04</b>  | 0.553775969547528    | <b>-0,01</b> | 0.849052646270222    |
| NRAS    | ENSG00000213281 | <b>-0,72</b> | 2.4429538510366e-32  | <b>-0,37</b> | 2.07769539640877e-07 |
| NRG1    | ENSG00000157168 | <b>-0,22</b> | 0.00223620687201368  | <b>0,10</b>  | 0.188268758914819    |
| NRG2    | ENSG00000158458 | <b>0,61</b>  | 2.94648449444351e-21 | <b>0,19</b>  | 0.01011891365336     |

|        |                 |              |                      |              |                      |
|--------|-----------------|--------------|----------------------|--------------|----------------------|
| NRG3   | ENSG00000185737 | <b>0,06</b>  | 0.38644227058143     | <b>0,21</b>  | 0.00352491287516225  |
| NRG4   | ENSG00000169752 | <b>-0,33</b> | 3.71305767243e-06    | <b>-0,38</b> | 5.18476130305131e-08 |
| NRTN   | ENSG00000171119 | <b>0,56</b>  | 3.79973082258011e-17 | <b>-0,16</b> | 0.0255635048195903   |
| NUP107 | ENSG00000111581 | <b>-0,62</b> | 9.43538460457257e-22 | <b>-0,25</b> | 0.000494824408482587 |
| NUP133 | ENSG00000069248 | <b>-0,42</b> | 2.16965760109799e-09 | <b>0,23</b>  | 0.00111830145709892  |
| NUP153 | ENSG00000124789 | <b>-0,54</b> | 4.82339383706369e-16 | <b>-0,02</b> | 0.7920089123163      |
| NUP155 | ENSG00000113569 | <b>-0,61</b> | 5.81849116112152e-21 | <b>0,07</b>  | 0.367715895286642    |
| NUP160 | ENSG00000030066 | <b>-0,63</b> | 3.28564870516045e-22 | <b>-0,12</b> | 0.103083038929497    |
| NUP188 | ENSG00000095319 | <b>-0,40</b> | 6.23734467188947e-09 | <b>0,08</b>  | 0.269944093112653    |
| NUP205 | ENSG00000155561 | <b>-0,49</b> | 6.05373792187457e-13 | <b>0,18</b>  | 0.0107606160356692   |
| NUP210 | ENSG00000132182 | <b>0,52</b>  | 1.56145423902717e-14 | <b>0,43</b>  | 5.11198069651801e-10 |
| NUP214 | ENSG00000126883 | <b>-0,48</b> | 1.53136965319655e-12 | <b>0,09</b>  | 0.210719310211561    |
| NUP35  | ENSG00000163002 | <b>-0,63</b> | 2.4225536094197e-22  | <b>-0,13</b> | 0.0654848141450346   |
| NUP37  | ENSG00000075188 | <b>-0,62</b> | 5.57337639243015e-22 | <b>-0,13</b> | 0.0788255914557274   |
| NUP43  | ENSG00000120253 | <b>-0,46</b> | 2.05722737722958e-11 | <b>-0,04</b> | 0.617820075165719    |
| NUP50  | ENSG00000093000 | <b>-0,64</b> | 8.1042268834265e-24  | <b>-0,08</b> | 0.301341611027481    |
| NUP54  | ENSG00000138750 | <b>-0,37</b> | 1.31410703669273e-07 | <b>-0,42</b> | 2.34668204893079e-09 |
| NUP58  | ENSG00000139496 | <b>-0,41</b> | 5.95306995962975e-09 | <b>0,04</b>  | 0.542416341467262    |
| NUP62  | ENSG00000213024 | <b>0,37</b>  | 1.36548541348522e-07 | <b>0,10</b>  | 0.175080687082358    |
| NUP85  | ENSG00000125450 | <b>-0,23</b> | 0.0013597614869025   | <b>-0,31</b> | 1.71806150412982e-05 |
| NUP88  | ENSG00000108559 | <b>-0,58</b> | 2.17069448206945e-18 | <b>-0,17</b> | 0.0188588087895462   |
| NUP93  | ENSG00000102900 | <b>-0,60</b> | 2.71805834933065e-20 | <b>-0,17</b> | 0.0161207349946931   |
| NUP98  | ENSG00000110713 | <b>-0,57</b> | 9.18879869168056e-18 | <b>0,08</b>  | 0.278583444628742    |
| NUPL2  | ENSG00000136243 | <b>-0,18</b> | 0.0113063582261728   | <b>0,02</b>  | 0.785220701246807    |
| OAS1   | ENSG00000089127 | <b>-0,15</b> | 0.0328201484234877   | <b>0,05</b>  | 0.480262960349265    |
| OAS2   | ENSG00000111335 | <b>-0,24</b> | 0.000864956449482526 | <b>-0,08</b> | 0.252654097541656    |
| OAS3   | ENSG00000111331 | <b>-0,26</b> | 0.000330722148169071 | <b>-0,14</b> | 0.0474655004707886   |
| OASL   | ENSG00000135114 | <b>-0,28</b> | 0.000104403949329355 | <b>-0,29</b> | 3.71092703163127e-05 |
| OPRD1  | ENSG00000116329 | <b>0,78</b>  | 1.54169413849143e-40 | <b>0,28</b>  | 7.23468169245944e-05 |
| OPRM1  | ENSG00000112038 | <b>0,02</b>  | 0.759475644215202    | <b>0,16</b>  | 0.0291026114821989   |
| OSM    | ENSG00000099985 | <b>0,24</b>  | 0.000652799939162351 | <b>-0,25</b> | 0.000431003212695394 |
| OSMR   | ENSG00000145623 | <b>-0,65</b> | 2.03919984970206e-24 | <b>-0,60</b> | 7.58445286554061e-20 |
| PAQR3  | ENSG00000163291 | <b>-0,49</b> | 5.41468657538426e-13 | <b>-0,07</b> | 0.340281542559996    |
| PDGFA  | ENSG00000197461 | <b>0,04</b>  | 0.626089165063433    | <b>-0,45</b> | 4.13858779805118e-11 |
| PDGFB  | ENSG00000100311 | <b>0,19</b>  | 0.0081006964117123   | <b>-0,15</b> | 0.0411937918306799   |
| PDGFRA | ENSG00000134853 | <b>-0,34</b> | 1.69482491096601e-06 | <b>-0,17</b> | 0.0201033963368846   |
| PDGFRB | ENSG00000113721 | <b>0,02</b>  | 0.827196848427399    | <b>0,19</b>  | 0.00836832573983567  |
| PEA15  | ENSG00000162734 | <b>-0,65</b> | 1.64023752354094e-24 | <b>-0,27</b> | 0.000202666382510082 |
| PEBP1  | ENSG00000089220 | <b>0,25</b>  | 0.000516161877985369 | <b>0,46</b>  | 2.02154583339568e-11 |
| PELI1  | ENSG00000197329 | <b>-0,38</b> | 4.34016196806095e-08 | <b>-0,13</b> | 0.0785560525101174   |
| PELI2  | ENSG00000139946 | <b>-0,33</b> | 3.06310669946723e-06 | <b>-0,24</b> | 0.000705477624879387 |
| PELI3  | ENSG00000174516 | <b>0,83</b>  | 1.58777613151634e-49 | <b>0,50</b>  | 2.80364309678431e-13 |
| PHB    | ENSG00000167085 | <b>-0,52</b> | 7.11281114075435e-15 | <b>-0,12</b> | 0.102923764522995    |
| PIAS1  | ENSG00000033800 | <b>-0,28</b> | 9.55460502211832e-05 | <b>0,38</b>  | 4.92018850220099e-08 |
| PIK3CA | ENSG00000121879 | <b>-0,67</b> | 2.39529234700326e-26 | <b>-0,17</b> | 0.0210010819676031   |
| PIK3CB | ENSG00000051382 | <b>-0,63</b> | 4.05405996223875e-22 | <b>-0,20</b> | 0.00456660588519594  |
| PIK3CD | ENSG00000171608 | <b>0,29</b>  | 5.85616427793295e-05 | <b>-0,34</b> | 1.86148637990212e-06 |
| PIK3R1 | ENSG00000145675 | <b>-0,70</b> | 4.94075866857068e-29 | <b>-0,09</b> | 0.19404408185396     |
| PIK3R2 | ENSG00000105647 | <b>0,77</b>  | 6.52792398222713e-39 | <b>0,42</b>  | 2.10515977066689e-09 |
| PIK3R3 | ENSG00000117461 | <b>-0,05</b> | 0.526593151012579    | <b>0,55</b>  | 1.10202969066579e-16 |
| PIM1   | ENSG00000137193 | <b>-0,17</b> | 0.0224194258620482   | <b>-0,53</b> | 1.66038013424789e-15 |
| PIN1   | ENSG00000127445 | <b>0,73</b>  | 1.91107049191611e-33 | <b>0,10</b>  | 0.154176054860317    |
| PLCG1  | ENSG00000124181 | <b>0,23</b>  | 0.00140045220331286  | <b>0,09</b>  | 0.230714922547303    |
| PML    | ENSG00000140464 | <b>0,61</b>  | 1.82685940214907e-20 | <b>-0,07</b> | 0.305318714987008    |
| POM121 | ENSG00000196313 | <b>0,26</b>  | 0.000299840881021032 | <b>0,10</b>  | 0.153894421241205    |
| POMC   | ENSG00000115138 | <b>0,70</b>  | 3.84337161142992e-29 | <b>0,00</b>  | 0.950619597990398    |
| POU2F1 | ENSG00000143190 | <b>-0,27</b> | 0.000176383941602508 | <b>0,14</b>  | 0.0505151537066798   |
| PPM1B  | ENSG00000138032 | <b>-0,45</b> | 7.49294356710572e-11 | <b>0,01</b>  | 0.896168314644143    |



|         |                 |       |                      |       |                      |
|---------|-----------------|-------|----------------------|-------|----------------------|
| PPP2CA  | ENSG00000113575 | -0,41 | 2.75800443762301e-09 | -0,09 | 0.232332134389138    |
| PPP2CB  | ENSG00000104695 | -0,29 | 5.60647540573015e-05 | 0,32  | 8.87827848932038e-06 |
| PPP2R1A | ENSG00000105568 | 0,21  | 0.00411510699179665  | -0,04 | 0.595479890872361    |
| PPP2R1B | ENSG00000137713 | -0,56 | 2.64266607345147e-17 | 0,07  | 0.329253344289962    |
| PPP2R5A | ENSG00000066027 | -0,13 | 0.0704977300686071   | -0,25 | 0.000623853979771191 |
| PPP2R5B | ENSG00000068971 | 0,64  | 5.1323842640375e-23  | 0,45  | 1.02371907339988e-10 |
| PPP2R5C | ENSG00000078304 | -0,46 | 1.24003157098214e-11 | 0,17  | 0.021634055537631    |
| PPP2R5D | ENSG00000112640 | -0,59 | 5.11323513896183e-19 | -0,05 | 0.533061354004436    |
| PPP2R5E | ENSG00000154001 | -0,63 | 1.24765630115595e-22 | -0,07 | 0.338795382647211    |
| PPP5C   | ENSG00000011485 | 0,31  | 1.12725309524602e-05 | 0,15  | 0.0410603305318604   |
| PRKACA  | ENSG00000072062 | -0,02 | 0.811248454719882    | 0,30  | 1.80774391133837e-05 |
| PRKCD   | ENSG00000163932 | -0,35 | 8.07477316843992e-07 | -0,18 | 0.0106597716713838   |
| PRLR    | ENSG00000113494 | -0,35 | 4.78539784286799e-07 | 0,25  | 0.000489188291246032 |
| PSMA1   | ENSG00000129084 | -0,63 | 5.91093840175842e-23 | -0,22 | 0.00243969049691303  |
| PSMA2   | ENSG00000106588 | -0,69 | 6.97558930068525e-29 | -0,22 | 0.00277387524746391  |
| PSMA3   | ENSG00000100567 | -0,57 | 9.31546119173232e-18 | -0,26 | 0.000359242634911862 |
| PSMA4   | ENSG00000041357 | -0,70 | 1.59526637778301e-29 | -0,27 | 0.0001997382402363   |
| PSMA5   | ENSG00000143106 | -0,62 | 1.22283291242e-21    | -0,13 | 0.0689881884176315   |
| PSMA6   | ENSG00000100902 | -0,68 | 2.4341994735323e-27  | -0,28 | 9.64207797588967e-05 |
| PSMA7   | ENSG00000101182 | 0,09  | 0.201609746145319    | -0,33 | 4.46556345624218e-06 |
| PSMB1   | ENSG00000008018 | -0,40 | 6.58571975830427e-09 | -0,14 | 0.0543987120862557   |
| PSMB10  | ENSG00000205220 | 0,57  | 5.46250678486104e-18 | -0,20 | 0.00467914779854022  |
| PSMB2   | ENSG00000126067 | -0,26 | 0.000352502494165879 | -0,24 | 0.000837427358250416 |
| PSMB4   | ENSG00000159377 | -0,52 | 1.81392014848244e-14 | -0,10 | 0.154514540724103    |
| PSMB5   | ENSG00000100804 | -0,53 | 2.09068676857083e-15 | 0,12  | 0.100115973272358    |
| PSMB6   | ENSG00000142507 | -0,40 | 1.55165249908528e-08 | -0,06 | 0.403769947502936    |
| PSMB7   | ENSG00000136930 | -0,71 | 1.01161102429398e-30 | -0,29 | 4.75950229454801e-05 |
| PSMB8   | ENSG00000204264 | -0,61 | 3.10896602614374e-21 | -0,37 | 1.56551206915383e-07 |
| PSMB9   | ENSG00000240065 | -0,07 | 0.31394140105893     | -0,33 | 2.37041173053431e-06 |
| PSMC1   | ENSG00000100764 | -0,47 | 4.48283161451359e-12 | -0,18 | 0.0109068276529132   |
| PSMC2   | ENSG00000161057 | -0,64 | 1.15967334501735e-23 | 0,01  | 0.839520912422848    |
| PSMC3   | ENSG00000165916 | -0,46 | 3.41835255513657e-11 | -0,10 | 0.155875761077245    |
| PSMC4   | ENSG00000013275 | -0,18 | 0.0142375115378979   | -0,19 | 0.00692976553882717  |
| PSMC5   | ENSG00000087191 | -0,56 | 2.41330104610685e-17 | 0,05  | 0.529987909623038    |
| PSMC6   | ENSG00000100519 | -0,60 | 4.59730298832783e-20 | -0,13 | 0.0674482024632227   |
| PSMD1   | ENSG00000173692 | -0,41 | 4.74070200732273e-09 | 0,15  | 0.0452669845205855   |
| PSMD10  | ENSG00000101843 | -0,61 | 4.627573628671e-21   | 0,12  | 0.108996242986061    |
| PSMD11  | ENSG00000108671 | -0,53 | 2.0118848243113e-15  | -0,12 | 0.0866336820354735   |
| PSMD12  | ENSG00000197170 | -0,36 | 2.83806967509658e-07 | -0,19 | 0.00786496076479258  |
| PSMD13  | ENSG00000185627 | -0,69 | 1.01542754970781e-28 | -0,25 | 0.000540829682780779 |
| PSMD14  | ENSG00000115233 | -0,47 | 3.93562400048325e-12 | -0,19 | 0.00725805034528575  |
| PSMD2   | ENSG00000175166 | -0,63 | 1.24551034008536e-22 | -0,04 | 0.62956761858887     |
| PSMD3   | ENSG00000108344 | -0,05 | 0.46781563891398     | -0,17 | 0.0224742031982313   |
| PSMD4   | ENSG00000159352 | -0,62 | 7.1381410022842e-22  | -0,12 | 0.109714837383775    |
| PSMD5   | ENSG00000095261 | -0,48 | 1.39963539759038e-12 | 0,09  | 0.201442479756507    |
| PSMD6   | ENSG00000163636 | -0,13 | 0.0635132405744652   | -0,33 | 4.2750865695564e-06  |
| PSMD7   | ENSG00000103035 | -0,30 | 3.4107898361622e-05  | -0,19 | 0.00788862672999768  |
| PSMD8   | ENSG00000099341 | -0,02 | 0.836402488045771    | -0,10 | 0.180945552323428    |
| PSMD9   | ENSG00000110801 | 0,27  | 0.000162609651579055 | -0,30 | 2.12762668062426e-05 |
| PSME1   | ENSG00000092010 | -0,45 | 1.05830651223265e-10 | -0,24 | 0.000743550092461142 |
| PSME2   | ENSG00000100911 | -0,53 | 1.78027227145649e-15 | -0,26 | 0.000269999842557765 |
| PSME3   | ENSG00000131467 | -0,65 | 6.44367280155985e-24 | -0,21 | 0.004243908170461    |
| PSME4   | ENSG00000068878 | -0,69 | 8.47686877068856e-28 | -0,31 | 1.19988348855721e-05 |
| PSMF1   | ENSG00000125818 | -0,08 | 0.27649658186066     | 0,09  | 0.211586853080366    |
| PSPN    | ENSG00000125650 | 0,25  | 0.000391748768345642 | 0,34  | 2.06101331582609e-06 |
| PTAFR   | ENSG00000169403 | -0,40 | 7.80619939501601e-09 | -0,22 | 0.00175393574728179  |
| PTGS2   | ENSG00000073756 | -0,37 | 1.06202411715418e-07 | -0,41 | 5.66990919222164e-09 |
| PTK2    | ENSG00000169398 | -0,42 | 1.07152054821376e-09 | 0,24  | 0.000760328366267928 |

|           |                 |              |                      |              |                      |
|-----------|-----------------|--------------|----------------------|--------------|----------------------|
| PTK2B     | ENSG00000120899 | <b>0,18</b>  | 0.0104280244768455   | <b>-0,09</b> | 0.227088637359813    |
| PTPN1     | ENSG00000196396 | <b>0,13</b>  | 0.0757562099293001   | <b>0,19</b>  | 0.00894536646261136  |
| PTPN11    | ENSG00000179295 | <b>-0,44</b> | 2.83742915818007e-10 | <b>0,19</b>  | 0.00849151413351793  |
| PTPN2     | ENSG00000175354 | <b>-0,40</b> | 8.0158053878309e-09  | <b>-0,56</b> | 7.30794410228303e-17 |
| PTPN6     | ENSG00000111679 | <b>0,28</b>  | 9.07159554868796e-05 | <b>-0,09</b> | 0.193182499885867    |
| PTPRA     | ENSG00000132670 | <b>-0,19</b> | 0.0100332626684455   | <b>0,37</b>  | 1.03574261973419e-07 |
| RAE1      | ENSG00000101146 | <b>-0,30</b> | 3.34846462301726e-05 | <b>-0,14</b> | 0.0568252262484159   |
| RAF1      | ENSG00000132155 | <b>-0,63</b> | 2.07438219146617e-22 | <b>-0,58</b> | 2.05221822580788e-18 |
| RAG1      | ENSG00000166349 | <b>-0,45</b> | 6.08272380941514e-11 | <b>-0,16</b> | 0.0321046862483524   |
| RAG2      | ENSG00000175097 | <b>0,00</b>  | 0.960816602179011    | <b>-0,05</b> | 0.476322243024174    |
| RANBP2    | ENSG00000153201 | <b>-0,23</b> | 0.0014755121451859   | <b>0,26</b>  | 0.000242215222635279 |
| RANBP9    | ENSG00000010017 | <b>-0,44</b> | 3.08446592250804e-10 | <b>0,06</b>  | 0.405437584768801    |
| RAP1A     | ENSG00000116473 | <b>-0,62</b> | 2.68365683637027e-21 | <b>-0,06</b> | 0.375865435998495    |
| RAP1B     | ENSG00000127314 | <b>-0,48</b> | 2.43262422550207e-12 | <b>-0,28</b> | 8.36087851979959e-05 |
| RAPGEF1   | ENSG00000107263 | <b>0,47</b>  | 7.21420063705013e-12 | <b>-0,15</b> | 0.0328580551711442   |
| RAPGEF2   | ENSG00000109756 | <b>-0,55</b> | 8.62364043874343e-17 | <b>-0,39</b> | 3.48163787733981e-08 |
| RASA1     | ENSG00000145715 | <b>-0,23</b> | 0.00163724540007045  | <b>0,21</b>  | 0.00422151354769547  |
| RASA2     | ENSG00000155903 | <b>-0,44</b> | 2.00136031350772e-10 | <b>-0,57</b> | 1.35022620482298e-17 |
| RASA3     | ENSG00000185989 | <b>0,18</b>  | 0.0120536003079959   | <b>-0,13</b> | 0.0688132564373196   |
| RASA4     | ENSG00000105808 | <b>0,69</b>  | 2.27225713975035e-28 | <b>0,46</b>  | 3.38227661797595e-11 |
| RASAL1    | ENSG00000111344 | <b>0,09</b>  | 0.197020922071119    | <b>-0,18</b> | 0.0139437752807615   |
| RASAL2    | ENSG00000075391 | <b>-0,57</b> | 3.4345593376472e-18  | <b>-0,25</b> | 0.000629779600307539 |
| RASAL3    | ENSG00000105122 | <b>0,37</b>  | 2.0424474413675e-07  | <b>-0,12</b> | 0.0913776715973027   |
| RASGEF1A  | ENSG00000198915 | <b>0,30</b>  | 2.08391972882806e-05 | <b>0,63</b>  | 6.01509495709097e-23 |
| RASGRF1   | ENSG00000058335 | <b>0,27</b>  | 0.00012526437903715  | <b>0,74</b>  | 7.10905913655742e-35 |
| RASGRF2   | ENSG00000113319 | <b>0,24</b>  | 0.000900942106677157 | <b>0,35</b>  | 1.00263490484336e-06 |
| RASGRP1   | ENSG00000172575 | <b>-0,12</b> | 0.11219567877165     | <b>0,44</b>  | 1.24364310748378e-10 |
| RASGRP3   | ENSG00000152689 | <b>-0,43</b> | 5.11724716822638e-10 | <b>-0,60</b> | 4.98639628508352e-20 |
| RASGRP4   | ENSG00000171777 | <b>0,20</b>  | 0.00452824398849106  | <b>-0,04</b> | 0.588323087183766    |
| RBX1      | ENSG00000100387 | <b>-0,37</b> | 1.26598373615541e-07 | <b>-0,11</b> | 0.117758027066243    |
| RELA      | ENSG00000173039 | <b>0,33</b>  | 2.60509100663762e-06 | <b>-0,32</b> | 4.81257582740091e-06 |
| RELB      | ENSG00000104856 | <b>0,34</b>  | 1.49315930795871e-06 | <b>-0,40</b> | 1.15561076208071e-08 |
| RET       | ENSG00000165731 | <b>0,31</b>  | 1.75515792857121e-05 | <b>0,32</b>  | 6.74857844552179e-06 |
| RHOU      | ENSG00000116574 | <b>-0,57</b> | 8.72103181529119e-18 | <b>-0,45</b> | 5.63342696299737e-11 |
| RIPK2     | ENSG00000104312 | <b>-0,40</b> | 7.76508291623069e-09 | <b>-0,59</b> | 4.30641191933855e-19 |
| RNASEL    | ENSG00000135828 | <b>-0,23</b> | 0.00109628575311977  | <b>0,14</b>  | 0.060581002434791    |
| RORA      | ENSG00000069667 | <b>-0,01</b> | 0.87186285420794     | <b>0,01</b>  | 0.941001231698221    |
| RORC      | ENSG00000143365 | <b>0,23</b>  | 0.00128873734992982  | <b>0,23</b>  | 0.00161669938527305  |
| RPS27A    | ENSG00000143947 | <b>-0,52</b> | 1.29280938389443e-14 | <b>-0,34</b> | 1.10727580600848e-06 |
| RSAD2     | ENSG00000134321 | <b>-0,22</b> | 0.00234969317224505  | <b>-0,19</b> | 0.00789868450016011  |
| S1PR1     | ENSG00000170989 | <b>0,02</b>  | 0.819116264631616    | <b>0,10</b>  | 0.15711272946185     |
| SAA1      | ENSG00000173432 | <b>-0,20</b> | 0.00533019861105571  | <b>-0,17</b> | 0.0223168546849501   |
| SAMHD1    | ENSG00000101347 | <b>-0,43</b> | 4.29490781061603e-10 | <b>-0,09</b> | 0.239278167595729    |
| SEH1L     | ENSG00000085415 | <b>-0,56</b> | 4.93599592435943e-17 | <b>-0,07</b> | 0.330701210950543    |
| SH2B1     | ENSG00000178188 | <b>0,65</b>  | 4.76530834506318e-24 | <b>0,03</b>  | 0.661961164327496    |
| SHC1      | ENSG00000160691 | <b>-0,15</b> | 0.0334010352016602   | <b>-0,28</b> | 9.70767651076089e-05 |
| SHC2      | ENSG00000129946 | <b>0,70</b>  | 4.10151320017954e-29 | <b>-0,06</b> | 0.425304112263489    |
| SHC3      | ENSG00000148082 | <b>0,08</b>  | 0.24842868160891     | <b>-0,12</b> | 0.0996121122533175   |
| SKP1      | ENSG00000113558 | <b>-0,62</b> | 1.19710147539641e-21 | <b>-0,09</b> | 0.199328127159309    |
| SMARCA4   | ENSG00000127616 | <b>0,53</b>  | 2.24356595606207e-15 | <b>-0,01</b> | 0.882042182699483    |
| SOCS1     | ENSG00000185338 | <b>0,62</b>  | 1.13362876375065e-21 | <b>-0,11</b> | 0.135148843402378    |
| SOCS2     | ENSG00000120833 | <b>0,17</b>  | 0.0169989833644122   | <b>-0,07</b> | 0.325388859958781    |
| SOCS2-AS1 | ENSG00000246985 | <b>0,16</b>  | 0.0275537081020637   | <b>0,16</b>  | 0.0257654666230072   |
| SOCS3     | ENSG00000184557 | <b>0,24</b>  | 0.000917143429051332 | <b>-0,39</b> | 1.89577019821364e-08 |
| SOCS4     | ENSG00000180008 | <b>-0,42</b> | 1.09908953291492e-09 | <b>0,15</b>  | 0.0337534242591804   |
| SOCS5     | ENSG00000171150 | <b>-0,34</b> | 1.16229795500811e-06 | <b>0,28</b>  | 7.78587049118092e-05 |
| SOCS5P4   | ENSG00000227536 | <b>0,15</b>  | 0.0449913041068375   | <b>0,00</b>  | 0.953049055954659    |
| SOCS6     | ENSG00000170677 | <b>-0,45</b> | 5.81029926580992e-11 | <b>0,24</b>  | 0.000833671270241291 |

|           |                 |              |                      |              |                      |
|-----------|-----------------|--------------|----------------------|--------------|----------------------|
| SOS1      | ENSG00000115904 | <b>-0,51</b> | 7.07731058980343e-14 | <b>0,18</b>  | 0.013979692177311    |
| SOX2      | ENSG00000181449 | <b>-0,07</b> | 0.342908890948238    | <b>-0,08</b> | 0.2480840686946      |
| SP100     | ENSG00000067066 | <b>-0,69</b> | 5.24596293123841e-28 | <b>-0,67</b> | 1.06105331400465e-26 |
| SPRED1    | ENSG00000166068 | <b>-0,68</b> | 6.25382886727468e-27 | <b>-0,31</b> | 1.72177408979535e-05 |
| SPRED2    | ENSG00000198369 | <b>-0,32</b> | 6.26519554144452e-06 | <b>-0,18</b> | 0.0122258388314194   |
| SPRED3    | ENSG00000188766 | <b>0,63</b>  | 1.02458257304999e-22 | <b>0,19</b>  | 0.00858261006652422  |
| SPTAN1    | ENSG00000197694 | <b>-0,29</b> | 4.36784209963666e-05 | <b>-0,15</b> | 0.0323907834283405   |
| SPTB      | ENSG00000070182 | <b>0,61</b>  | 1.56970670352961e-20 | <b>0,59</b>  | 3.42176195722659e-19 |
| SPTBN1    | ENSG00000115306 | <b>-0,48</b> | 2.66300953936054e-12 | <b>-0,39</b> | 2.54246882391312e-08 |
| SPTBN2    | ENSG00000173898 | <b>0,80</b>  | 6.43571263031852e-43 | <b>0,23</b>  | 0.00123864311713928  |
| SPTBN4    | ENSG00000160460 | <b>0,83</b>  | 6.93874620907857e-49 | <b>0,33</b>  | 3.03342572919351e-06 |
| SPTBN5    | ENSG00000137877 | <b>0,48</b>  | 1.58147972287098e-12 | <b>-0,26</b> | 0.000353404661915741 |
| SQSTM1    | ENSG00000161011 | <b>0,34</b>  | 1.0468206756078e-06  | <b>-0,26</b> | 0.000240691537685364 |
| SRC       | ENSG00000197122 | <b>0,08</b>  | 0.262402472097997    | <b>-0,39</b> | 2.39005445263932e-08 |
| STAT1     | ENSG00000115415 | <b>-0,46</b> | 1.4084182737644e-11  | <b>0,08</b>  | 0.270253906811317    |
| STAT2     | ENSG00000170581 | <b>-0,39</b> | 1.74298679914003e-08 | <b>0,06</b>  | 0.42665854407596     |
| STAT3     | ENSG00000168610 | <b>-0,46</b> | 1.24763123118793e-11 | <b>0,13</b>  | 0.0793916043044484   |
| STAT5A    | ENSG00000126561 | <b>-0,17</b> | 0.0193706168094797   | <b>-0,35</b> | 8.63634668143367e-07 |
| STAT5B    | ENSG00000173757 | <b>-0,08</b> | 0.246635997702101    | <b>0,18</b>  | 0.0130559703411971   |
| STAT6     | ENSG00000166888 | <b>-0,25</b> | 0.000617279201061092 | <b>-0,34</b> | 1.44452420385678e-06 |
| STX1A     | ENSG00000106089 | <b>0,74</b>  | 9.80358947408866e-35 | <b>0,33</b>  | 3.69356064054362e-06 |
| STX3      | ENSG00000166900 | <b>-0,20</b> | 0.0049334206878707   | <b>-0,07</b> | 0.315421789938787    |
| STX4      | ENSG00000103496 | <b>-0,02</b> | 0.752224523715741    | <b>-0,37</b> | 1.08476798350082e-07 |
| SUMO1     | ENSG00000116030 | <b>-0,53</b> | 2.47603772375236e-15 | <b>-0,12</b> | 0.107537020215407    |
| SYK       | ENSG00000165025 | <b>-0,56</b> | 2.27291333125735e-17 | <b>-0,24</b> | 0.000919588522465793 |
| SYNGAP1   | ENSG00000197283 | <b>0,57</b>  | 1.45215668549315e-17 | <b>0,33</b>  | 4.4782837044856e-06  |
| TAB1      | ENSG00000100324 | <b>0,63</b>  | 1.28386119895019e-22 | <b>0,03</b>  | 0.66563699546499     |
| TAB2      | ENSG00000055208 | <b>-0,41</b> | 5.05079019304517e-09 | <b>0,04</b>  | 0.573441685779374    |
| TAB3      | ENSG00000157625 | <b>-0,52</b> | 1.75063160477548e-14 | <b>0,01</b>  | 0.939505621197513    |
| TEC       | ENSG00000135605 | <b>0,04</b>  | 0.620873521725902    | <b>0,27</b>  | 0.000198382251602702 |
| TEK       | ENSG00000120156 | <b>-0,22</b> | 0.00272244213226528  | <b>0,12</b>  | 0.0909038862850218   |
| TGFB1     | ENSG00000105329 | <b>0,55</b>  | 1.32308433819893e-16 | <b>0,01</b>  | 0.897066530135416    |
| TIMP1     | ENSG00000102265 | <b>0,17</b>  | 0.0192965888765126   | <b>0,06</b>  | 0.420418613804641    |
| TLN1      | ENSG00000137076 | <b>0,07</b>  | 0.357222755155559    | <b>0,08</b>  | 0.279649653625641    |
| TNF       | ENSG00000232810 | <b>-0,17</b> | 0.0219343961824148   | <b>-0,33</b> | 2.27682620675884e-06 |
| TNFRSF11A | ENSG00000141655 | <b>-0,05</b> | 0.530375301551475    | <b>0,18</b>  | 0.0148482737165256   |
| TNFRSF11B | ENSG00000164761 | <b>-0,33</b> | 4.20310444357322e-06 | <b>-0,10</b> | 0.177258719078243    |
| TNFRSF12A | ENSG00000006327 | <b>0,44</b>  | 1.33906626529597e-10 | <b>-0,32</b> | 7.51562673086217e-06 |
| TNFRSF14  | ENSG00000157873 | <b>0,67</b>  | 6.21552243012454e-26 | <b>-0,07</b> | 0.348979672551429    |
| TNFRSF18  | ENSG00000186891 | <b>0,53</b>  | 2.66139092572026e-15 | <b>-0,07</b> | 0.343631083939922    |
| TNFRSF1A  | ENSG00000067182 | <b>0,16</b>  | 0.0249198701319338   | <b>-0,31</b> | 1.15091426619657e-05 |
| TNFRSF1B  | ENSG00000028137 | <b>-0,06</b> | 0.404942955135092    | <b>-0,14</b> | 0.0477794458894424   |
| TNFRSF25  | ENSG00000215788 | <b>0,43</b>  | 6.47770095024338e-10 | <b>-0,11</b> | 0.114125196411887    |
| TNFRSF4   | ENSG00000186827 | <b>0,74</b>  | 2.16882986031124e-34 | <b>0,04</b>  | 0.571010011360076    |
| TNFRSF6B  | ENSG00000243509 | <b>0,62</b>  | 2.27464606718979e-21 | <b>-0,04</b> | 0.607501024867946    |
| TNFRSF9   | ENSG00000049249 | <b>-0,50</b> | 1.0070028517877e-13  | <b>-0,35</b> | 8.87565160868024e-07 |
| TNFSF11   | ENSG00000120659 | <b>-0,38</b> | 5.60512313684955e-08 | <b>-0,35</b> | 7.11257109015937e-07 |
| TNFSF12   | ENSG00000239697 | <b>0,47</b>  | 6.09118885732618e-12 | <b>0,05</b>  | 0.534358536366696    |
| TNFSF13   | ENSG00000161955 | <b>-0,12</b> | 0.108513720967559    | <b>-0,11</b> | 0.124282656441977    |
| TNFSF13B  | ENSG00000102524 | <b>0,03</b>  | 0.671849702058623    | <b>-0,15</b> | 0.0449051433756027   |
| TNFSF14   | ENSG00000125735 | <b>-0,13</b> | 0.067541145631017    | <b>-0,28</b> | 6.87163173038349e-05 |
| TNFSF15   | ENSG00000181634 | <b>-0,43</b> | 5.7751199031524e-10  | <b>-0,24</b> | 0.000762369856125732 |
| TNFSF18   | ENSG00000120337 | <b>-0,22</b> | 0.00256556137585864  | <b>-0,05</b> | 0.529961608286036    |
| TNFSF4    | ENSG00000117586 | <b>-0,05</b> | 0.513552135998122    | <b>0,52</b>  | 2.33517396890738e-14 |
| TNFSF9    | ENSG00000125657 | <b>0,16</b>  | 0.0313243857917947   | <b>-0,36</b> | 4.55003719792772e-07 |
| TNIP2     | ENSG00000168884 | <b>0,55</b>  | 2.95516914995812e-16 | <b>-0,21</b> | 0.00359823075359182  |
| TOLLIP    | ENSG00000078902 | <b>0,83</b>  | 5.81664600081825e-50 | <b>0,27</b>  | 0.000184423083762339 |
| TP53      | ENSG00000141510 | <b>-0,33</b> | 2.50339530430448e-06 | <b>-0,13</b> | 0.0795110617038005   |

|        |                 |              |                      |              |                      |
|--------|-----------------|--------------|----------------------|--------------|----------------------|
| TPR    | ENSG00000047410 | <b>-0,28</b> | 9.1218883555313e-05  | <b>-0,03</b> | 0.670969248921206    |
| TRAF2  | ENSG00000127191 | <b>0,62</b>  | 1.04382589432806e-21 | <b>-0,03</b> | 0.656224728116167    |
| TRAF3  | ENSG00000131323 | <b>0,56</b>  | 1.74566636174895e-17 | <b>0,09</b>  | 0.213743615770432    |
| TRAF6  | ENSG00000175104 | <b>-0,55</b> | 8.75714446453464e-17 | <b>-0,03</b> | 0.708375135881821    |
| TRIM10 | ENSG00000204613 | <b>-0,23</b> | 0.00156289312372338  | <b>-0,24</b> | 0.000974832087318299 |
| TRIM14 | ENSG00000106785 | <b>0,20</b>  | 0.00517951985555743  | <b>-0,03</b> | 0.700124652637551    |
| TRIM17 | ENSG00000162931 | <b>0,28</b>  | 7.0171863253822e-05  | <b>-0,15</b> | 0.0400242635409909   |
| TRIM2  | ENSG00000109654 | <b>-0,06</b> | 0.404391480392056    | <b>0,53</b>  | 3.48048683374772e-15 |
| TRIM21 | ENSG00000132109 | <b>-0,52</b> | 1.69581064085608e-14 | <b>-0,23</b> | 0.00114695604613319  |
| TRIM22 | ENSG00000132274 | <b>-0,29</b> | 5.60814749934302e-05 | <b>-0,20</b> | 0.00657301357749269  |
| TRIM25 | ENSG00000121060 | <b>-0,52</b> | 6.71996864034073e-15 | <b>-0,21</b> | 0.00382735405395848  |
| TRIM26 | ENSG00000234127 | <b>-0,17</b> | 0.0188485001001899   | <b>-0,29</b> | 4.20187009111721e-05 |
| TRIM29 | ENSG00000137699 | <b>-0,11</b> | 0.136420081544235    | <b>-0,19</b> | 0.00917730597847544  |
| TRIM3  | ENSG00000110171 | <b>0,65</b>  | 2.28360443101778e-24 | <b>0,18</b>  | 0.0153836516626748   |
| TRIM31 | ENSG00000204616 | <b>-0,15</b> | 0.0351680587470194   | <b>-0,25</b> | 0.000410941117778941 |
| TRIM34 | ENSG00000258659 | <b>-0,47</b> | 4.18960538952854e-12 | <b>-0,21</b> | 0.00307383823744581  |
| TRIM35 | ENSG00000104228 | <b>-0,01</b> | 0.934064622295998    | <b>0,12</b>  | 0.101272344512958    |
| TRIM38 | ENSG00000112343 | <b>-0,51</b> | 3.94248494347381e-14 | <b>-0,31</b> | 1.5450032546911e-05  |
| TRIM45 | ENSG00000134253 | <b>-0,28</b> | 7.80981009979289e-05 | <b>-0,36</b> | 3.74850625143589e-07 |
| TRIM46 | ENSG00000163462 | <b>0,71</b>  | 2.6361543793505e-30  | <b>0,18</b>  | 0.010887443150471    |
| TRIM5  | ENSG00000132256 | <b>-0,49</b> | 3.73190027201171e-13 | <b>-0,27</b> | 0.000168554525425517 |
| TRIM6  | ENSG00000121236 | <b>-0,56</b> | 4.72032373754496e-17 | <b>-0,39</b> | 2.67008418478172e-08 |
| TRIM62 | ENSG00000116525 | <b>0,11</b>  | 0.139952373286212    | <b>0,02</b>  | 0.798763084780243    |
| TRIM68 | ENSG00000167333 | <b>-0,50</b> | 2.53573098673162e-13 | <b>0,16</b>  | 0.0252675494280328   |
| TRIM8  | ENSG00000171206 | <b>0,54</b>  | 3.93309820324546e-16 | <b>-0,15</b> | 0.0422667660760826   |
| TWIST1 | ENSG00000122691 | <b>0,35</b>  | 8.12817948872299e-07 | <b>-0,09</b> | 0.204810417583056    |
| TXLNA  | ENSG00000084652 | <b>-0,12</b> | 0.0884062756279006   | <b>0,42</b>  | 1.31225027256287e-09 |
| TYK2   | ENSG00000105397 | <b>0,65</b>  | 1.55184202437123e-24 | <b>-0,02</b> | 0.769230270167196    |
| UBA3   | ENSG00000144744 | <b>-0,59</b> | 4.32557498833879e-19 | <b>-0,08</b> | 0.283724776655148    |
| UBA52  | ENSG00000221983 | <b>-0,72</b> | 1.86618598734546e-31 | <b>-0,24</b> | 0.000873939378966847 |
| UBA7   | ENSG00000182179 | <b>0,05</b>  | 0.480049135193552    | <b>-0,23</b> | 0.00158606487991596  |
| UBB    | ENSG00000170315 | <b>-0,59</b> | 2.50119210933739e-19 | <b>0,14</b>  | 0.0625638107445379   |
| UBC    | ENSG00000150991 | <b>-0,56</b> | 2.78723123981906e-17 | <b>-0,07</b> | 0.364084254050423    |
| UBE2E1 | ENSG00000170142 | <b>-0,72</b> | 2.09272003809478e-31 | <b>-0,20</b> | 0.00612306999863171  |
| UBE2L6 | ENSG00000156587 | <b>-0,40</b> | 1.07744726518065e-08 | <b>-0,01</b> | 0.928487466220116    |
| UBE2M  | ENSG00000130725 | <b>0,58</b>  | 2.79356741447247e-18 | <b>0,02</b>  | 0.820551005180682    |
| UBE2N  | ENSG00000177889 | <b>-0,67</b> | 2.73300126693736e-26 | <b>-0,03</b> | 0.639894938211311    |
| UBE2V1 | ENSG00000244687 | <b>-0,76</b> | 4.52754229365559e-37 | <b>-0,16</b> | 0.0243507130100157   |
| USP18  | ENSG00000184979 | <b>-0,22</b> | 0.00230514533456041  | <b>0,38</b>  | 4.49955508301541e-08 |
| USP41  | ENSG00000161133 | <b>-0,09</b> | 0.235345585994485    | <b>0,53</b>  | 5.97833039674411e-15 |
| VAV1   | ENSG00000141968 | <b>-0,22</b> | 0.00188089971434898  | <b>-0,11</b> | 0.137469707678826    |
| VCAM1  | ENSG00000162692 | <b>-0,49</b> | 9.16998464331095e-13 | <b>-0,39</b> | 1.73018586390805e-08 |
| VCL    | ENSG00000035403 | <b>-0,46</b> | 1.73507451509654e-11 | <b>-0,13</b> | 0.0666242946820397   |
| WDR83  | ENSG00000123154 | <b>0,50</b>  | 3.35451945973665e-13 | <b>-0,07</b> | 0.37026468253741     |
| VEGFA  | ENSG00000112715 | <b>0,53</b>  | 1.81895745605374e-15 | <b>0,23</b>  | 0.00121702159828756  |
| VIM    | ENSG00000026025 | <b>-0,17</b> | 0.0197071921753891   | <b>-0,22</b> | 0.0025610374159709   |
| VWF    | ENSG00000110799 | <b>0,13</b>  | 0.0668068058761352   | <b>0,06</b>  | 0.441535516380717    |
| XAF1   | ENSG00000132530 | <b>-0,12</b> | 0.10030354173073     | <b>-0,04</b> | 0.607941869840259    |
| YES1   | ENSG00000176105 | <b>-0,51</b> | 5.02818472381152e-14 | <b>-0,36</b> | 2.85572502308216e-07 |
| YWHAB  | ENSG00000166913 | <b>-0,58</b> | 1.11996181937778e-18 | <b>-0,10</b> | 0.18611295501768     |
| YWHAZ  | ENSG00000164924 | <b>-0,68</b> | 7.43283883774398e-27 | <b>-0,43</b> | 6.05930707585603e-10 |
| ZEB1   | ENSG00000148516 | <b>-0,32</b> | 8.1544148872618e-06  | <b>0,09</b>  | 0.235240783189018    |

Table S2C

**MAFA and MAFB co-expression correlations with gene-induced downstream cytokine signaling**

| GeneName | GeneID          | MAFA_GC      | P-value              | MAFB_GC      | P-value              |
|----------|-----------------|--------------|----------------------|--------------|----------------------|
| ACE      | ENSG00000159640 | <b>0,36</b>  | 3.07221154809881e-07 | <b>0,24</b>  | 0.00076864978212352  |
| ADCY1    | ENSG00000164742 | <b>0,34</b>  | 1.23002449200616e-06 | <b>0,70</b>  | 4.00921961866783e-29 |
| AGER     | ENSG00000204305 | <b>0,39</b>  | 3.59588223542614e-08 | <b>-0,17</b> | 0.0174285717422343   |
| AGTR1    | ENSG00000144891 | <b>-0,07</b> | 0.31248549648881     | <b>0,12</b>  | 0.10662154160853     |
| AKT1     | ENSG00000142208 | <b>0,49</b>  | 4.07315761278472e-13 | <b>-0,12</b> | 0.0868735039250571   |
| AKT2     | ENSG00000105221 | <b>0,49</b>  | 3.72634275580924e-13 | <b>-0,19</b> | 0.00818748202932539  |
| AKT3     | ENSG00000117020 | <b>0,15</b>  | 0.0403729970246283   | <b>0,58</b>  | 1.18585366248312e-18 |
| ALOX5    | ENSG00000012779 | <b>0,30</b>  | 1.87152802173304e-05 | <b>-0,06</b> | 0.437355233947124    |
| ANTXR1   | ENSG00000169604 | <b>-0,33</b> | 3.36899260340411e-06 | <b>0,08</b>  | 0.243951849682682    |
| ANTXR2   | ENSG00000163297 | <b>-0,50</b> | 3.09017986607524e-13 | <b>-0,25</b> | 0.000398844463605281 |
| AOX1     | ENSG00000138356 | <b>-0,34</b> | 2.14361228521916e-06 | <b>-0,07</b> | 0.327134306896325    |
| APEX1    | ENSG00000100823 | <b>-0,73</b> | 4.99792910510267e-33 | <b>-0,24</b> | 0.000823482510460096 |
| APP      | ENSG00000142192 | <b>-0,47</b> | 3.89752983276076e-12 | <b>0,16</b>  | 0.0240831635670573   |
| ARIH2    | ENSG00000177479 | <b>-0,44</b> | 1.56498146449489e-10 | <b>-0,14</b> | 0.0523466306426547   |
| ATF1     | ENSG00000123268 | <b>-0,56</b> | 4.24181941097132e-17 | <b>0,02</b>  | 0.804377996583631    |
| ATF2     | ENSG00000115966 | <b>-0,30</b> | 3.2891616577512e-05  | <b>0,32</b>  | 8.62644875169852e-06 |
| ATG12    | ENSG00000145782 | <b>-0,64</b> | 1.69389230749401e-23 | <b>-0,20</b> | 0.00675881239009479  |
| ATG16L1  | ENSG00000085978 | <b>-0,40</b> | 1.22327485014815e-08 | <b>-0,17</b> | 0.0212374436233437   |
| ATG5     | ENSG00000057663 | <b>-0,47</b> | 4.90127566011895e-12 | <b>-0,31</b> | 1.11914538411058e-05 |
| ATRAID   | ENSG00000138085 | <b>0,07</b>  | 0.353462838460288    | <b>0,14</b>  | 0.0486641035106652   |
| B2M      | ENSG00000166710 | <b>-0,63</b> | 1.57472746308634e-22 | <b>-0,26</b> | 0.000301092518759588 |
| BACH2    | ENSG00000112182 | <b>-0,29</b> | 4.57520038667183e-05 | <b>-0,41</b> | 5.2898841627837e-09  |
| BATF     | ENSG00000156127 | <b>0,15</b>  | 0.040132158107048    | <b>-0,13</b> | 0.0763698625994746   |
| BCL10    | ENSG00000142867 | <b>-0,59</b> | 2.77171789458138e-19 | <b>-0,61</b> | 3.75492806887587e-21 |
| BCL11B   | ENSG00000127152 | <b>-0,22</b> | 0.00179908667005796  | <b>-0,11</b> | 0.119566751490548    |
| BCL2     | ENSG00000171791 | <b>-0,61</b> | 1.57569459075146e-20 | <b>-0,37</b> | 1.25077746579985e-07 |
| BCL2L1   | ENSG00000171552 | <b>-0,05</b> | 0.485231362791119    | <b>-0,20</b> | 0.00575913089355628  |
| BCL6     | ENSG00000113916 | <b>-0,13</b> | 0.0713773538285527   | <b>-0,51</b> | 6.06666734707207e-14 |
| BDKRB2   | ENSG00000168398 | <b>-0,46</b> | 3.05039888861174e-11 | <b>-0,23</b> | 0.00130689270892648  |
| BIRC2    | ENSG00000110330 | <b>-0,70</b> | 1.91247074936007e-29 | <b>-0,49</b> | 3.47471121485483e-13 |
| BIRC3    | ENSG00000023445 | <b>-0,53</b> | 5.64894897445921e-15 | <b>-0,52</b> | 1.01889991519376e-14 |
| BLNK     | ENSG00000095585 | <b>-0,43</b> | 7.83727840585589e-10 | <b>-0,42</b> | 2.33253796601925e-09 |
| BMS1P4   | ENSG00000271816 | <b>0,12</b>  | 0.0961128686830574   | <b>-0,25</b> | 0.000459505853007303 |
| BMS1P4   | ENSG00000242338 | <b>0,17</b>  | 0.0213790518064362   | <b>-0,22</b> | 0.00237511311369295  |
| BMX      | ENSG00000102010 | <b>-0,13</b> | 0.0824375599515399   | <b>-0,12</b> | 0.0862478163888359   |
| BRCC3    | ENSG00000185515 | <b>-0,60</b> | 4.76915223850473e-20 | <b>0,00</b>  | 0.948826447152677    |
| BTK      | ENSG00000010671 | <b>-0,25</b> | 0.000460965731176732 | <b>0,09</b>  | 0.239600973233454    |
| BTRC     | ENSG00000166167 | <b>-0,41</b> | 2.45485533120055e-09 | <b>0,32</b>  | 6.28551551572272e-06 |
| C1QA     | ENSG00000173372 | <b>0,17</b>  | 0.0184792411047264   | <b>0,12</b>  | 0.103291903030109    |
| C1QB     | ENSG00000173369 | <b>0,13</b>  | 0.0662561426266017   | <b>0,15</b>  | 0.0379178898234398   |
| C1QBP    | ENSG00000108561 | <b>-0,27</b> | 0.000179898229939293 | <b>-0,25</b> | 0.000580065877950579 |
| C1QC     | ENSG00000159189 | <b>0,35</b>  | 8.93754611036145e-07 | <b>0,11</b>  | 0.135483924559332    |
| C3       | ENSG00000125730 | <b>-0,31</b> | 9.18296977902629e-06 | <b>-0,34</b> | 1.12574702169532e-06 |
| CABIN1   | ENSG00000099991 | <b>0,31</b>  | 1.19236825777335e-05 | <b>0,32</b>  | 4.63071555219305e-06 |
| CALR     | ENSG00000179218 | <b>-0,54</b> | 5.86251283144638e-16 | <b>-0,01</b> | 0.908583859637705    |
| CARD11   | ENSG00000198286 | <b>0,31</b>  | 1.08474132109785e-05 | <b>0,04</b>  | 0.553737198478194    |
| CARD16   | ENSG00000204397 | <b>-0,10</b> | 0.185296309718169    | <b>-0,11</b> | 0.146466963695937    |
| CARD6    | ENSG00000132357 | <b>-0,66</b> | 4.67365799818045e-25 | <b>-0,47</b> | 4.11341831900753e-12 |
| CARD8    | ENSG00000105483 | <b>-0,17</b> | 0.021431909686224    | <b>0,03</b>  | 0.637331568977448    |
| CARD9    | ENSG00000187796 | <b>0,68</b>  | 5.17865902357258e-27 | <b>-0,01</b> | 0.873620011090735    |
| CASP1    | ENSG00000137752 | <b>-0,37</b> | 1.27731924197375e-07 | <b>-0,28</b> | 9.59804207795709e-05 |
| CASP12   | ENSG00000204403 | <b>-0,10</b> | 0.159292141779571    | <b>0,03</b>  | 0.664342030620829    |
| CASP4    | ENSG00000196954 | <b>-0,64</b> | 2.77024102061509e-23 | <b>-0,66</b> | 2.75533330707951e-25 |

|         |                 |              |                      |              |                      |
|---------|-----------------|--------------|----------------------|--------------|----------------------|
| CASP8   | ENSG00000064012 | <b>-0,50</b> | 2.00944932332427e-13 | <b>-0,40</b> | 8.97088158582183e-09 |
| CASR    | ENSG00000036828 | <b>0,10</b>  | 0.157107715298627    | <b>0,67</b>  | 2.73499975540068e-26 |
| CBL     | ENSG00000110395 | <b>-0,55</b> | 3.46855474788441e-16 | <b>0,05</b>  | 0.504839833517787    |
| CBLB    | ENSG00000114423 | <b>-0,43</b> | 7.85886612417744e-10 | <b>-0,03</b> | 0.726133961907254    |
| CCL2    | ENSG00000108691 | <b>-0,47</b> | 6.41416189475132e-12 | <b>-0,46</b> | 1.41332859075084e-11 |
| CCND1   | ENSG00000110092 | <b>-0,33</b> | 4.00428196513867e-06 | <b>-0,37</b> | 1.33681641242413e-07 |
| CCND2   | ENSG00000118971 | <b>-0,25</b> | 0.000390220294231601 | <b>0,18</b>  | 0.01226290018092     |
| CCND3   | ENSG00000112576 | <b>0,63</b>  | 1.99608430889085e-22 | <b>0,43</b>  | 6.19337045886328e-10 |
| CD14    | ENSG00000170458 | <b>0,63</b>  | 1.80968303395632e-22 | <b>0,10</b>  | 0.15297374967771     |
| CD180   | ENSG00000134061 | <b>-0,30</b> | 3.11125104536506e-05 | <b>0,09</b>  | 0.221293104019655    |
| CD2     | ENSG00000116824 | <b>-0,31</b> | 1.31400834625803e-05 | <b>-0,21</b> | 0.00393827816533609  |
| CD247   | ENSG00000198821 | <b>-0,05</b> | 0.453918883964064    | <b>-0,23</b> | 0.00169976049177098  |
| CD274   | ENSG00000120217 | <b>-0,41</b> | 3.48301356939234e-09 | <b>-0,21</b> | 0.00309209704619428  |
| CD276   | ENSG00000103855 | <b>0,29</b>  | 3.60074165967333e-05 | <b>-0,12</b> | 0.0861441389517456   |
| CD2AP   | ENSG00000198087 | <b>-0,52</b> | 9.33056482053055e-15 | <b>-0,24</b> | 0.000722228872781915 |
| CD34    | ENSG00000174059 | <b>-0,03</b> | 0.691145710777611    | <b>0,09</b>  | 0.238991357785317    |
| CD36    | ENSG00000135218 | <b>-0,14</b> | 0.0501483907875544   | <b>0,33</b>  | 3.98276990022087e-06 |
| CD38    | ENSG00000004468 | <b>-0,25</b> | 0.000451467300035776 | <b>-0,10</b> | 0.183691593006662    |
| CD3E    | ENSG00000198851 | <b>-0,33</b> | 2.23054669030193e-06 | <b>-0,25</b> | 0.000519246889560994 |
| CD40    | ENSG00000101017 | <b>-0,22</b> | 0.00245987679052234  | <b>-0,27</b> | 0.000173068923433882 |
| CD44    | ENSG00000026508 | <b>-0,61</b> | 3.86976825536918e-21 | <b>-0,55</b> | 8.21955012712848e-17 |
| CD46    | ENSG00000117335 | <b>-0,38</b> | 4.5217780783939e-08  | <b>0,14</b>  | 0.0468538562862642   |
| CD63    | ENSG00000135404 | <b>-0,47</b> | 4.62592637766424e-12 | <b>-0,21</b> | 0.00312753635346265  |
| CD74    | ENSG00000019582 | <b>-0,22</b> | 0.00176761821586089  | <b>-0,43</b> | 7.37162803041539e-10 |
| CD79A   | ENSG00000105369 | <b>0,09</b>  | 0.195021460756633    | <b>-0,21</b> | 0.00393681661902317  |
| CD80    | ENSG00000121594 | <b>-0,09</b> | 0.222628048127229    | <b>-0,26</b> | 0.000315313495242874 |
| CD82    | ENSG00000085117 | <b>0,52</b>  | 6.86972257855284e-15 | <b>0,23</b>  | 0.00158324328647096  |
| CD83    | ENSG00000112149 | <b>-0,31</b> | 1.57624387518375e-05 | <b>-0,10</b> | 0.155603315294833    |
| CD86    | ENSG00000114013 | <b>-0,45</b> | 5.19997845189528e-11 | <b>-0,22</b> | 0.00274785207855291  |
| CD8A    | ENSG00000153563 | <b>-0,14</b> | 0.0511538289510875   | <b>0,12</b>  | 0.0872547964958877   |
| CDCP1   | ENSG00000163814 | <b>-0,52</b> | 2.22049758653104e-14 | <b>-0,13</b> | 0.0785770499816104   |
| CDIP1   | ENSG00000089486 | <b>0,43</b>  | 5.9545586917864e-10  | <b>0,68</b>  | 1.99111413476404e-27 |
| CDKN1A  | ENSG00000124762 | <b>0,21</b>  | 0.00313834927732949  | <b>-0,13</b> | 0.0807422336973029   |
| CEACAM1 | ENSG00000079385 | <b>-0,33</b> | 2.7445863111038e-06  | <b>-0,05</b> | 0.468684559310743    |
| CEACAM5 | ENSG00000105388 | <b>-0,20</b> | 0.00598873307632171  | <b>-0,10</b> | 0.174119666036429    |
| CEBPA   | ENSG00000245848 | <b>0,21</b>  | 0.00304521634877005  | <b>-0,34</b> | 1.33299119629224e-06 |
| CEBPB   | ENSG00000172216 | <b>0,60</b>  | 2.9899164695653e-20  | <b>-0,17</b> | 0.0189782157002947   |
| CEBPD   | ENSG00000221869 | <b>0,55</b>  | 1.46597502611609e-16 | <b>-0,24</b> | 0.000846135608802876 |
| CFLAR   | ENSG00000003402 | <b>-0,55</b> | 8.85426705917221e-17 | <b>-0,61</b> | 4.70444178155653e-21 |
| CHUK    | ENSG00000213341 | <b>-0,34</b> | 1.1178268897534e-06  | <b>0,20</b>  | 0.00625863331816267  |
| CIITA   | ENSG00000179583 | <b>0,16</b>  | 0.0251925400006313   | <b>0,05</b>  | 0.454992654836226    |
| CISH    | ENSG00000114737 | <b>-0,04</b> | 0.623436251380992    | <b>-0,53</b> | 1.83498073104994e-15 |
| CNPY3   | ENSG00000137161 | <b>0,26</b>  | 0.000232340144421899 | <b>0,18</b>  | 0.0137918276095558   |
| CNTF    | ENSG00000242689 | <b>-0,38</b> | 8.88862438427588e-08 | <b>-0,15</b> | 0.035450938097936    |
| CNTFR   | ENSG00000122756 | <b>0,37</b>  | 2.04816568631161e-07 | <b>-0,06</b> | 0.411403060567298    |
| COG8    | ENSG00000272617 | <b>0,33</b>  | 2.54106421135974e-06 | <b>0,24</b>  | 0.000714724698464077 |
| COG8    | ENSG00000213380 | <b>0,16</b>  | 0.0261138224580358   | <b>0,04</b>  | 0.620638377021973    |
| CREB1   | ENSG00000118260 | <b>-0,50</b> | 2.03336285650518e-13 | <b>0,13</b>  | 0.0669786486565456   |
| CREBBP  | ENSG00000005339 | <b>0,21</b>  | 0.00401466401809987  | <b>-0,14</b> | 0.0520105793553384   |
| CRHR1   | ENSG00000120088 | <b>-0,26</b> | 0.00022533086282746  | <b>0,37</b>  | 1.0127341939085e-07  |
| CSF2    | ENSG00000164400 | <b>0,03</b>  | 0.681839701485133    | <b>-0,33</b> | 4.43750237595565e-06 |
| CSF2RB  | ENSG00000100368 | <b>0,13</b>  | 0.0688725900856352   | <b>0,05</b>  | 0.470530770022826    |
| CSF3    | ENSG00000108342 | <b>0,18</b>  | 0.0154185750024194   | <b>-0,36</b> | 2.92319384299176e-07 |
| CSF3R   | ENSG00000119535 | <b>-0,02</b> | 0.827356498428349    | <b>-0,05</b> | 0.48260413478207     |
| CTF1    | ENSG00000150281 | <b>0,06</b>  | 0.374255243047533    | <b>-0,15</b> | 0.0449285995603537   |
| CTNNA1  | ENSG00000119326 | <b>-0,55</b> | 2.91947244597432e-16 | <b>-0,47</b> | 1.16545157428446e-11 |
| CTSB    | ENSG00000164733 | <b>-0,23</b> | 0.00164734200909167  | <b>0,15</b>  | 0.0374069104674115   |
| CTSK    | ENSG00000143387 | <b>-0,27</b> | 0.000166098540894403 | <b>-0,14</b> | 0.0541527448122166   |

|          |                 |              |                      |              |                      |
|----------|-----------------|--------------|----------------------|--------------|----------------------|
| CTSL     | ENSG00000135047 | <b>-0,45</b> | 6.64945503807615e-11 | <b>-0,05</b> | 0.481623419548414    |
| CTSS     | ENSG00000163131 | <b>-0,64</b> | 2.80608287840347e-23 | <b>-0,44</b> | 1.50630985858255e-10 |
| CTSV     | ENSG00000136943 | <b>-0,07</b> | 0.312328687620984    | <b>0,25</b>  | 0.000546119597743917 |
| CUEDC2   | ENSG00000107874 | <b>0,38</b>  | 8.52365558581324e-08 | <b>0,11</b>  | 0.13155172264729     |
| CUL1     | ENSG00000055130 | <b>-0,52</b> | 2.14761458340907e-14 | <b>-0,21</b> | 0.00400553337582581  |
| CXCL1    | ENSG00000163739 | <b>-0,21</b> | 0.00367753408294341  | <b>-0,41</b> | 2.5377874669153e-09  |
| CXCL10   | ENSG00000169245 | <b>-0,20</b> | 0.00635049523593809  | <b>-0,30</b> | 1.90252887758536e-05 |
| CXCL11   | ENSG00000169248 | <b>-0,25</b> | 0.000407303894057176 | <b>-0,23</b> | 0.00109819780946129  |
| CXCL12   | ENSG00000107562 | <b>-0,25</b> | 0.000383990851726459 | <b>-0,39</b> | 2.10479387532965e-08 |
| CXCL2    | ENSG00000081041 | <b>-0,17</b> | 0.0193860342280525   | <b>-0,47</b> | 7.45811154682921e-12 |
| CXCL3    | ENSG00000163734 | <b>-0,13</b> | 0.0751678973976666   | <b>-0,53</b> | 3.42505660121794e-15 |
| CXCL8    | ENSG00000169429 | <b>-0,42</b> | 1.12097774486885e-09 | <b>-0,54</b> | 1.55144253234339e-15 |
| CXCL9    | ENSG00000138755 | <b>-0,21</b> | 0.00288462294587905  | <b>-0,21</b> | 0.00355173584180992  |
| CXCR4    | ENSG00000121966 | <b>-0,18</b> | 0.0125262267219206   | <b>0,03</b>  | 0.650330003763597    |
| CXCR5    | ENSG00000160683 | <b>0,34</b>  | 1.14022885829554e-06 | <b>-0,30</b> | 2.11468012073142e-05 |
| CYB561D2 | ENSG00000114395 | <b>0,46</b>  | 1.48845693188467e-11 | <b>-0,03</b> | 0.664963989251457    |
| CYBA     | ENSG00000051523 | <b>0,52</b>  | 1.63351244427542e-14 | <b>-0,26</b> | 0.000286402080127753 |
| CYBB     | ENSG00000165168 | <b>-0,44</b> | 2.64750126097317e-10 | <b>-0,10</b> | 0.162358053660834    |
| CYLD     | ENSG00000083799 | <b>-0,24</b> | 0.000867446080372755 | <b>0,22</b>  | 0.00257779403575003  |
| DAPP1    | ENSG00000070190 | <b>-0,37</b> | 1.15785472813085e-07 | <b>-0,32</b> | 7.22587891589799e-06 |
| DCLRE1C  | ENSG00000152457 | <b>-0,64</b> | 2.94752586147688e-23 | <b>-0,46</b> | 2.15893958584831e-11 |
| DDX58    | ENSG00000107201 | <b>-0,42</b> | 9.47228472906936e-10 | <b>-0,23</b> | 0.00110291790660329  |
| DHX33    | ENSG00000005100 | <b>-0,62</b> | 1.84303262785406e-21 | <b>-0,31</b> | 1.25445246833463e-05 |
| DHX36    | ENSG00000174953 | <b>-0,45</b> | 1.01826907853331e-10 | <b>0,20</b>  | 0.00500524683407353  |
| DHX58    | ENSG00000108771 | <b>0,47</b>  | 4.42466552537902e-12 | <b>-0,22</b> | 0.00206682956848339  |
| DHX9     | ENSG00000135829 | <b>-0,51</b> | 4.06940241394339e-14 | <b>-0,12</b> | 0.11122258089935     |
| DNM1     | ENSG00000106976 | <b>0,60</b>  | 2.27903640224175e-20 | <b>0,50</b>  | 1.24954258666217e-13 |
| DNM1L    | ENSG00000087470 | <b>-0,52</b> | 1.65116124976206e-14 | <b>0,15</b>  | 0.0388038796102578   |
| DNM2     | ENSG00000079805 | <b>0,48</b>  | 1.87895913695288e-12 | <b>-0,09</b> | 0.203129019485856    |
| DNM3     | ENSG00000197959 | <b>0,39</b>  | 2.202097629183e-08   | <b>0,40</b>  | 1.03591433385072e-08 |
| DUSP3    | ENSG00000108861 | <b>-0,37</b> | 1.68260584981176e-07 | <b>0,21</b>  | 0.00419548757052364  |
| DUSP4    | ENSG00000120875 | <b>-0,42</b> | 2.32293611490365e-09 | <b>-0,54</b> | 1.09789203695076e-15 |
| DUSP6    | ENSG00000139318 | <b>-0,17</b> | 0.0206498672669411   | <b>-0,29</b> | 5.71289633798277e-05 |
| DUSP7    | ENSG00000164086 | <b>0,57</b>  | 4.05257135265869e-18 | <b>0,03</b>  | 0.716312135057821    |
| ECSIT    | ENSG00000130159 | <b>0,50</b>  | 1.06435295847241e-13 | <b>-0,16</b> | 0.0268018127541946   |
| EEA1     | ENSG00000102189 | <b>-0,52</b> | 6.91807588875939e-15 | <b>0,03</b>  | 0.698535858465582    |
| EGF      | ENSG00000138798 | <b>-0,41</b> | 5.7824858431494e-09  | <b>-0,32</b> | 8.98574152974385e-06 |
| EGFR     | ENSG00000146648 | <b>-0,60</b> | 4.3058782674096e-20  | <b>-0,50</b> | 1.1243564967149e-13  |
| EGR1     | ENSG00000120738 | <b>-0,14</b> | 0.0623343681152722   | <b>-0,22</b> | 0.00280085718660578  |
| ELK1     | ENSG00000126767 | <b>0,27</b>  | 0.000160530947133916 | <b>0,00</b>  | 0.970772676472226    |
| ENPP3    | ENSG00000154269 | <b>0,03</b>  | 0.722571319429362    | <b>0,12</b>  | 0.0870954154617166   |
| EP300    | ENSG00000100393 | <b>-0,21</b> | 0.00340861626434952  | <b>0,00</b>  | 0.990585855749299    |
| EPOR     | ENSG00000187266 | <b>0,68</b>  | 1.0512794301319e-27  | <b>0,06</b>  | 0.449496651539812    |
| ERBIN    | ENSG00000112851 | <b>-0,68</b> | 1.84040505573995e-27 | <b>-0,30</b> | 3.08744217174619e-05 |
| ERC1     | ENSG00000082805 | <b>-0,37</b> | 1.30976557715621e-07 | <b>0,23</b>  | 0.00148115475931647  |
| FADD     | ENSG00000168040 | <b>-0,15</b> | 0.0356583211386548   | <b>-0,22</b> | 0.00279319763901373  |
| FAS      | ENSG00000026103 | <b>-0,50</b> | 2.27089514974497e-13 | <b>-0,36</b> | 4.30367878444592e-07 |
| FBXW11   | ENSG00000072803 | <b>-0,34</b> | 1.52499677719491e-06 | <b>0,30</b>  | 2.63687140639665e-05 |
| FBXW5    | ENSG00000159069 | <b>0,67</b>  | 8.300357758917e-26   | <b>-0,07</b> | 0.34772404092846     |
| FER      | ENSG00000151422 | <b>-0,41</b> | 6.1414569469831e-09  | <b>0,11</b>  | 0.118017837300769    |
| FGA      | ENSG00000171560 | <b>-0,31</b> | 1.56959891589665e-05 | <b>-0,31</b> | 1.34666094371246e-05 |
| FGB      | ENSG00000171564 | <b>-0,25</b> | 0.000378372380822799 | <b>-0,19</b> | 0.0080915117011165   |
| FGG      | ENSG00000171557 | <b>-0,29</b> | 3.76327983815819e-05 | <b>-0,32</b> | 8.44356327212361e-06 |
| FHL1     | ENSG00000022267 | <b>-0,03</b> | 0.705289749761935    | <b>0,46</b>  | 1.28645214407851e-11 |
| FLI1     | ENSG00000151702 | <b>-0,08</b> | 0.288590233390852    | <b>0,12</b>  | 0.109616914294162    |
| FOS      | ENSG00000170345 | <b>0,07</b>  | 0.319430866802173    | <b>-0,10</b> | 0.171969344062599    |
| FOSB     | ENSG00000125740 | <b>-0,07</b> | 0.346250438022188    | <b>-0,19</b> | 0.00692814571659591  |
| FOSL1    | ENSG00000175592 | <b>0,01</b>  | 0.914382309139964    | <b>-0,33</b> | 2.55881682999694e-06 |

|           |                 |              |                      |              |                      |
|-----------|-----------------|--------------|----------------------|--------------|----------------------|
| FOSL2     | ENSG00000075426 | <b>-0,35</b> | 8.4636821023894e-07  | <b>-0,64</b> | 2.72553634975147e-23 |
| FOXP3     | ENSG00000049768 | <b>0,47</b>  | 6.03958835098345e-12 | <b>0,13</b>  | 0.0689972235202294   |
| GABARAP   | ENSG00000170296 | <b>-0,48</b> | 3.67438012266113e-12 | <b>0,18</b>  | 0.0132480655612883   |
| GABARAPL1 | ENSG00000139112 | <b>-0,41</b> | 3.03874483722e-09    | <b>-0,24</b> | 0.000715774843026657 |
| GABARAPL2 | ENSG00000034713 | <b>0,19</b>  | 0.00722966796322994  | <b>0,22</b>  | 0.00201095226776799  |
| GATA2     | ENSG00000179348 | <b>0,38</b>  | 4.45201041396795e-08 | <b>-0,23</b> | 0.00165022138823529  |
| GATA3     | ENSG00000107485 | <b>0,07</b>  | 0.316648697971256    | <b>-0,19</b> | 0.0069102554727463   |
| GATA6     | ENSG00000141448 | <b>0,18</b>  | 0.0118513556956707   | <b>-0,36</b> | 2.81561672589483e-07 |
| GBP1      | ENSG00000117228 | <b>-0,54</b> | 3.72749092694847e-16 | <b>-0,39</b> | 1.62642204239511e-08 |
| GBP2      | ENSG00000162645 | <b>-0,48</b> | 2.60404210434064e-12 | <b>-0,48</b> | 2.35061797063963e-12 |
| GBP3      | ENSG00000117226 | <b>-0,33</b> | 3.50073784638969e-06 | <b>-0,26</b> | 0.000333079671380302 |
| GBP4      | ENSG00000162654 | <b>-0,20</b> | 0.00599815698168757  | <b>-0,01</b> | 0.87584477265925     |
| GBP5      | ENSG00000154451 | <b>-0,32</b> | 8.76934311592565e-06 | <b>-0,24</b> | 0.000648027424968863 |
| GDF15     | ENSG00000130513 | <b>0,53</b>  | 2.65575445929727e-15 | <b>-0,20</b> | 0.00653922299482418  |
| GFAP      | ENSG00000131095 | <b>0,02</b>  | 0.829704642602318    | <b>0,11</b>  | 0.138342656781757    |
| GHR       | ENSG00000112964 | <b>-0,32</b> | 8.68237515685064e-06 | <b>0,29</b>  | 6.13402030775807e-05 |
| GIMAP5    | ENSG00000196329 | <b>-0,17</b> | 0.0183333113261417   | <b>0,17</b>  | 0.017130288663123    |
| GNA11     | ENSG00000088256 | <b>0,75</b>  | 4.42510410324174e-35 | <b>0,11</b>  | 0.114958752856712    |
| GNA14     | ENSG00000156049 | <b>-0,24</b> | 0.000846535758117121 | <b>-0,17</b> | 0.0163801613613496   |
| GNA15     | ENSG00000060558 | <b>0,24</b>  | 0.000664080634858414 | <b>-0,15</b> | 0.0453458975114817   |
| GNAI1     | ENSG00000127955 | <b>0,07</b>  | 0.360975106197036    | <b>0,65</b>  | 2.50539940076264e-24 |
| GNAI2     | ENSG00000114353 | <b>0,72</b>  | 2.84968091546757e-31 | <b>0,49</b>  | 7.51529355457076e-13 |
| GNAI3     | ENSG00000065135 | <b>-0,68</b> | 7.22903848301321e-27 | <b>-0,30</b> | 3.22859217667975e-05 |
| GNAL      | ENSG00000141404 | <b>0,08</b>  | 0.271026598480733    | <b>-0,03</b> | 0.641203767508172    |
| GNAO1     | ENSG00000087258 | <b>0,61</b>  | 1.27707576261866e-20 | <b>0,75</b>  | 3.16438474852285e-36 |
| GNAQ      | ENSG00000156052 | <b>-0,34</b> | 1.12776930638562e-06 | <b>0,25</b>  | 0.000436008994415049 |
| GNAS      | ENSG00000087460 | <b>0,06</b>  | 0.396315918150228    | <b>0,61</b>  | 1.8705399746648e-20  |
| GPX1      | ENSG00000233276 | <b>0,64</b>  | 3.16946788665237e-23 | <b>-0,12</b> | 0.112601732785659    |
| GRB2      | ENSG00000177885 | <b>-0,33</b> | 4.11133454298968e-06 | <b>0,00</b>  | 0.988232456850839    |
| GRK6      | ENSG00000198055 | <b>0,60</b>  | 2.27519295088087e-20 | <b>-0,09</b> | 0.196655260820615    |
| GSDMD     | ENSG00000104518 | <b>0,60</b>  | 2.14960484813796e-20 | <b>-0,18</b> | 0.0149668836944798   |
| GZMB      | ENSG00000100453 | <b>-0,07</b> | 0.351670093339684    | <b>-0,15</b> | 0.0340925504782046   |
| HAVCR1    | ENSG00000113249 | <b>-0,35</b> | 6.57283091896305e-07 | <b>-0,13</b> | 0.0687601242119925   |
| HAVCR2    | ENSG00000135077 | <b>-0,30</b> | 3.37417972950292e-05 | <b>-0,12</b> | 0.096150386924099    |
| HCK       | ENSG00000101336 | <b>-0,24</b> | 0.000667377904420875 | <b>-0,03</b> | 0.634449615819388    |
| HCLS1     | ENSG00000180353 | <b>-0,25</b> | 0.000470464901844308 | <b>0,03</b>  | 0.65923540517845     |
| HMGB1     | ENSG00000189403 | <b>-0,47</b> | 1.09830958412856e-11 | <b>-0,19</b> | 0.00703428082896763  |
| HMOX1     | ENSG00000100292 | <b>0,09</b>  | 0.201600022912768    | <b>-0,07</b> | 0.326888502930445    |
| HRAS      | ENSG00000174775 | <b>0,55</b>  | 2.46001885119236e-16 | <b>0,06</b>  | 0.405352115542166    |
| HSP90AA1  | ENSG00000080824 | <b>-0,39</b> | 3.46285886000608e-08 | <b>0,10</b>  | 0.167349914358279    |
| HSP90AB1  | ENSG00000096384 | <b>-0,60</b> | 5.75613230831096e-20 | <b>0,05</b>  | 0.480447459721814    |
| HSP90B1   | ENSG00000166598 | <b>-0,30</b> | 2.46119325311968e-05 | <b>0,00</b>  | 0.96229049370025     |
| ICAM2     | ENSG00000108622 | <b>0,11</b>  | 0.134328040339662    | <b>0,32</b>  | 6.1274373747144e-06  |
| ID3       | ENSG00000117318 | <b>0,59</b>  | 1.15986638978871e-19 | <b>-0,08</b> | 0.259396705013588    |
| IDO1      | ENSG00000131203 | <b>-0,21</b> | 0.00398221657944314  | <b>-0,17</b> | 0.0182573367158244   |
| IFI16     | ENSG00000163565 | <b>-0,34</b> | 1.67670760690685e-06 | <b>-0,27</b> | 0.000192580545122838 |
| IFIH1     | ENSG00000115267 | <b>-0,35</b> | 4.95295621421065e-07 | <b>0,19</b>  | 0.0080246166595001   |
| IFNAR1    | ENSG00000142166 | <b>-0,63</b> | 1.93927974544317e-22 | <b>-0,26</b> | 0.000304375990188567 |
| IFNAR2    | ENSG00000159110 | <b>-0,66</b> | 1.12799580148387e-25 | <b>-0,42</b> | 1.9875301607214e-09  |
| IFNGR1    | ENSG00000027697 | <b>-0,61</b> | 9.20222557434055e-21 | <b>-0,47</b> | 6.89646309761597e-12 |
| IFNGR2    | ENSG00000159128 | <b>-0,51</b> | 2.75065468913454e-14 | <b>-0,54</b> | 4.3989143154181e-16  |
| IFNLR1    | ENSG00000185436 | <b>-0,31</b> | 1.556330238438e-05   | <b>-0,13</b> | 0.0754043913196151   |
| IKBK      | ENSG00000104365 | <b>0,00</b>  | 0.955333101431861    | <b>-0,29</b> | 6.32388919004456e-05 |
| IKZF1     | ENSG00000185811 | <b>-0,32</b> | 5.98788332420838e-06 | <b>-0,15</b> | 0.0327310047413403   |
| IL10      | ENSG00000136634 | <b>-0,35</b> | 6.62961598191475e-07 | <b>-0,14</b> | 0.0481751827565998   |
| IL10RA    | ENSG00000110324 | <b>0,18</b>  | 0.0125206546242096   | <b>0,57</b>  | 3.4786531533015e-18  |
| IL10RB    | ENSG00000243646 | <b>-0,42</b> | 9.56550701097362e-10 | <b>-0,38</b> | 5.57365766134934e-08 |
| IL11      | ENSG00000095752 | <b>-0,07</b> | 0.365283087770948    | <b>-0,32</b> | 7.52132567074106e-06 |



|         |                 |              |                      |              |                      |
|---------|-----------------|--------------|----------------------|--------------|----------------------|
| IL11RA  | ENSG00000137070 | <b>0,39</b>  | 1.96444396848656e-08 | <b>-0,07</b> | 0.319166387616187    |
| IL12A   | ENSG00000168811 | <b>0,00</b>  | 0.991110726408829    | <b>-0,38</b> | 7.9570963243035e-08  |
| IL12RB1 | ENSG00000096996 | <b>0,23</b>  | 0.00122230356369201  | <b>0,15</b>  | 0.0390269569523579   |
| IL12RB2 | ENSG00000081985 | <b>-0,33</b> | 2.71023299394142e-06 | <b>-0,30</b> | 1.96597294538937e-05 |
| IL13RA1 | ENSG00000131724 | <b>-0,53</b> | 3.74050990258939e-15 | <b>-0,02</b> | 0.760937217074865    |
| IL13RA2 | ENSG00000123496 | <b>-0,31</b> | 1.25502366462693e-05 | <b>-0,18</b> | 0.0109951027134327   |
| IL15    | ENSG00000164136 | <b>-0,22</b> | 0.00267988795387774  | <b>-0,70</b> | 6.9321397775139e-29  |
| IL15RA  | ENSG00000134470 | <b>0,02</b>  | 0.776052277699761    | <b>-0,58</b> | 2.89052913197342e-18 |
| IL17D   | ENSG00000172458 | <b>0,35</b>  | 6.02171551746405e-07 | <b>0,30</b>  | 1.98213111798617e-05 |
| IL18    | ENSG00000150782 | <b>-0,27</b> | 0.000193778534666499 | <b>-0,32</b> | 4.62993766015631e-06 |
| IL1B    | ENSG00000125538 | <b>-0,35</b> | 7.39860946753494e-07 | <b>-0,35</b> | 8.80488246544108e-07 |
| IL1RN   | ENSG00000136689 | <b>-0,28</b> | 7.23573823279185e-05 | <b>-0,34</b> | 1.91738457528817e-06 |
| IL20RA  | ENSG00000016402 | <b>0,09</b>  | 0.193573144428191    | <b>0,41</b>  | 3.82020705217257e-09 |
| IL20RB  | ENSG00000174564 | <b>0,01</b>  | 0.867333638448443    | <b>-0,22</b> | 0.0023392089228126   |
| IL21R   | ENSG00000103522 | <b>0,37</b>  | 1.34228519291631e-07 | <b>0,06</b>  | 0.427981985859474    |
| IL22RA1 | ENSG00000142677 | <b>-0,30</b> | 3.08367034022956e-05 | <b>-0,48</b> | 2.87726914589897e-12 |
| IL23A   | ENSG00000110944 | <b>-0,03</b> | 0.644645797902959    | <b>-0,45</b> | 9.67115060054828e-11 |
| IL23R   | ENSG00000162594 | <b>-0,22</b> | 0.00257454489699698  | <b>0,22</b>  | 0.00182712979345897  |
| IL24    | ENSG00000162892 | <b>-0,29</b> | 3.79070970091223e-05 | <b>-0,17</b> | 0.0192959023633358   |
| IL27RA  | ENSG00000104998 | <b>-0,10</b> | 0.162994150074083    | <b>-0,40</b> | 8.86323974097409e-09 |
| IL2RB   | ENSG00000100385 | <b>-0,18</b> | 0.0144431332335081   | <b>-0,26</b> | 0.000343963819283761 |
| IL2RG   | ENSG00000147168 | <b>-0,40</b> | 7.15846989614708e-09 | <b>-0,24</b> | 0.000732077598678967 |
| IL4R    | ENSG00000077238 | <b>-0,24</b> | 0.000698199612902479 | <b>-0,60</b> | 9.01546609244505e-20 |
| IL5RA   | ENSG00000091181 | <b>0,03</b>  | 0.700688253503954    | <b>0,18</b>  | 0.0131308852385535   |
| IL6     | ENSG00000136244 | <b>-0,38</b> | 6.23851661010328e-08 | <b>-0,54</b> | 1.04547716421021e-15 |
| IL6R    | ENSG00000160712 | <b>0,24</b>  | 0.00098114997789636  | <b>0,36</b>  | 3.88431360002777e-07 |
| IL6ST   | ENSG00000134352 | <b>-0,75</b> | 3.44003434019804e-35 | <b>-0,27</b> | 0.000126298974719615 |
| IL7     | ENSG00000104432 | <b>-0,13</b> | 0.0689954954170196   | <b>-0,11</b> | 0.125212694452644    |
| IL7R    | ENSG00000168685 | <b>-0,39</b> | 2.05832329971e-08    | <b>-0,28</b> | 9.30815288694941e-05 |
| INPP5D  | ENSG00000168918 | <b>-0,03</b> | 0.680907530145568    | <b>0,13</b>  | 0.0686788270498966   |
| INPPL1  | ENSG00000165458 | <b>0,40</b>  | 8.76495288213761e-09 | <b>-0,03</b> | 0.68995585681913     |
| IRAK1   | ENSG00000184216 | <b>0,50</b>  | 2.20514607971888e-13 | <b>-0,12</b> | 0.103457118518497    |
| IRAK2   | ENSG00000134070 | <b>-0,35</b> | 6.95029660032743e-07 | <b>-0,43</b> | 7.01973501615173e-10 |
| IRAK3   | ENSG00000090376 | <b>-0,39</b> | 2.47592964601667e-08 | <b>-0,13</b> | 0.0726301846659023   |
| IRAK4   | ENSG00000198001 | <b>-0,47</b> | 5.89109885371024e-12 | <b>-0,07</b> | 0.309402333728931    |
| IRF1    | ENSG00000125347 | <b>-0,22</b> | 0.00218498430516907  | <b>-0,45</b> | 6.8595246836266e-11  |
| IRF2    | ENSG00000168310 | <b>-0,53</b> | 2.64551578741172e-15 | <b>-0,12</b> | 0.0860556588295567   |
| IRF2BP1 | ENSG00000170604 | <b>0,72</b>  | 9.17104891882578e-32 | <b>0,10</b>  | 0.183485049010059    |
| IRF2BP2 | ENSG00000168264 | <b>0,53</b>  | 1.68888176200459e-15 | <b>0,24</b>  | 0.000896726432369371 |
| IRF2BPL | ENSG00000119669 | <b>0,74</b>  | 6.00356439834529e-34 | <b>0,10</b>  | 0.191013699605074    |
| IRF3    | ENSG00000126456 | <b>0,62</b>  | 1.55820327947092e-21 | <b>-0,13</b> | 0.0674161842953076   |
| IRF4    | ENSG00000137265 | <b>-0,37</b> | 1.1784521145191e-07  | <b>-0,50</b> | 3.2774625407313e-13  |
| IRF5    | ENSG00000128604 | <b>0,52</b>  | 6.57680600283766e-15 | <b>-0,13</b> | 0.0848245154461347   |
| IRF6    | ENSG00000117595 | <b>-0,56</b> | 4.31345058997722e-17 | <b>0,07</b>  | 0.317195808715754    |
| IRF7    | ENSG00000185507 | <b>0,66</b>  | 2.2146313704963e-25  | <b>-0,12</b> | 0.108319133878486    |
| IRF8    | ENSG00000140968 | <b>-0,17</b> | 0.0189482704504927   | <b>-0,20</b> | 0.00606151359148182  |
| IRF9    | ENSG00000213928 | <b>-0,01</b> | 0.927355270888246    | <b>-0,11</b> | 0.13027341850353     |
| ITCH    | ENSG00000078747 | <b>-0,60</b> | 4.22823020929935e-20 | <b>0,00</b>  | 0.995443777689389    |
| ITGAM   | ENSG00000169896 | <b>-0,25</b> | 0.000595098079308897 | <b>-0,39</b> | 3.24725303031618e-08 |
| ITGB2   | ENSG00000160255 | <b>0,11</b>  | 0.115161320399373    | <b>-0,07</b> | 0.302669643195739    |
| ITK     | ENSG00000113263 | <b>-0,35</b> | 9.48872696010573e-07 | <b>-0,36</b> | 2.7307851825753e-07  |
| ITPR1   | ENSG00000150995 | <b>-0,19</b> | 0.00737111439320625  | <b>0,36</b>  | 2.55509115938012e-07 |
| ITPR2   | ENSG00000123104 | <b>-0,43</b> | 3.87773800527843e-10 | <b>-0,02</b> | 0.777396709371253    |
| ITPR3   | ENSG00000096433 | <b>0,52</b>  | 1.4137230967383e-14  | <b>0,03</b>  | 0.644539315465679    |
| JAK1    | ENSG00000162434 | <b>-0,52</b> | 1.21965899014069e-14 | <b>-0,17</b> | 0.0181285138677532   |
| JAK2    | ENSG00000096968 | <b>-0,21</b> | 0.00293620050676593  | <b>0,31</b>  | 1.15950395778076e-05 |
| JAK3    | ENSG00000105639 | <b>0,16</b>  | 0.0254759799124599   | <b>-0,12</b> | 0.10278525129845     |
| JUN     | ENSG00000177606 | <b>0,52</b>  | 1.31951739040314e-14 | <b>-0,14</b> | 0.0515921985821478   |

|          |                 |              |                      |              |                      |
|----------|-----------------|--------------|----------------------|--------------|----------------------|
| JUNB     | ENSG00000171223 | <b>0,64</b>  | 7.67212510391768e-24 | <b>-0,12</b> | 0.102603877780216    |
| JUND     | ENSG00000130522 | <b>0,63</b>  | 3.82201233809119e-22 | <b>-0,04</b> | 0.545072472364982    |
| KIT      | ENSG00000157404 | <b>-0,32</b> | 6.06911145992919e-06 | <b>-0,14</b> | 0.0548835554504869   |
| KITLG    | ENSG00000049130 | <b>-0,59</b> | 2.75247625001181e-19 | <b>-0,24</b> | 0.000939067200012976 |
| L1CAM    | ENSG00000198910 | <b>0,66</b>  | 3.85954487597072e-25 | <b>0,52</b>  | 2.3287909822314e-14  |
| LAG3     | ENSG00000089692 | <b>0,26</b>  | 0.000351965640202587 | <b>-0,11</b> | 0.130712200205277    |
| LAT      | ENSG00000213658 | <b>0,43</b>  | 3.55290622637628e-10 | <b>-0,19</b> | 0.00780893729859522  |
| LAT2     | ENSG00000086730 | <b>0,15</b>  | 0.0396274372030864   | <b>0,28</b>  | 7.09962378807394e-05 |
| LBP      | ENSG00000129988 | <b>-0,31</b> | 1.41177897209494e-05 | <b>-0,36</b> | 4.62292072031325e-07 |
| LCK      | ENSG00000182866 | <b>-0,15</b> | 0.0353462625797426   | <b>-0,23</b> | 0.00136232130345569  |
| LCP1     | ENSG00000136167 | <b>-0,60</b> | 1.10630737088561e-19 | <b>-0,32</b> | 8.83239700673441e-06 |
| LCP2     | ENSG00000043462 | <b>-0,33</b> | 3.3978182306189e-06  | <b>-0,01</b> | 0.887113276895679    |
| LEPR     | ENSG00000116678 | <b>-0,13</b> | 0.0727229845871705   | <b>0,44</b>  | 2.83709669415057e-10 |
| LGALS1   | ENSG00000100097 | <b>0,18</b>  | 0.0136906312741114   | <b>-0,06</b> | 0.446393595057236    |
| LGALS3   | ENSG00000131981 | <b>-0,04</b> | 0.625148796013988    | <b>-0,54</b> | 1.39997868335968e-15 |
| LGALS9   | ENSG00000168961 | <b>-0,24</b> | 0.000649493932591455 | <b>-0,41</b> | 6.19081511091341e-09 |
| LGMN     | ENSG00000100600 | <b>-0,06</b> | 0.372975840224934    | <b>0,25</b>  | 0.000634980657576646 |
| LIF      | ENSG00000128342 | <b>-0,05</b> | 0.482819781309866    | <b>-0,45</b> | 6.38650230162e-11    |
| LIFR     | ENSG00000113594 | <b>-0,64</b> | 2.66231348605376e-23 | <b>-0,42</b> | 1.55726367986194e-09 |
| LILRB1   | ENSG00000104972 | <b>-0,03</b> | 0.632167860358662    | <b>-0,05</b> | 0.523110539175119    |
| LITAF    | ENSG00000189067 | <b>-0,54</b> | 1.51346752468505e-15 | <b>-0,48</b> | 3.61387449261535e-12 |
| LSP1     | ENSG00000130592 | <b>0,37</b>  | 2.01883529356566e-07 | <b>-0,11</b> | 0.113768012545791    |
| LY86     | ENSG00000112799 | <b>-0,27</b> | 0.000120473749485373 | <b>-0,05</b> | 0.512495295967913    |
| LY96     | ENSG00000154589 | <b>-0,22</b> | 0.00195846263185404  | <b>-0,13</b> | 0.0753037824128098   |
| LYN      | ENSG00000254087 | <b>-0,60</b> | 9.33987560128866e-20 | <b>-0,54</b> | 1.34097702010841e-15 |
| MALT1    | ENSG00000172175 | <b>-0,49</b> | 6.06702914488493e-13 | <b>-0,33</b> | 2.59213679360673e-06 |
| MAP2K1   | ENSG00000169032 | <b>-0,42</b> | 1.0089549299884e-09  | <b>-0,13</b> | 0.0641132819324937   |
| MAP2K2   | ENSG00000126934 | <b>0,66</b>  | 1.17674104864783e-25 | <b>0,00</b>  | 0.958168479966848    |
| MAP2K3   | ENSG00000034152 | <b>0,31</b>  | 1.74885548526188e-05 | <b>-0,30</b> | 2.24391426857431e-05 |
| MAP2K4   | ENSG00000065559 | <b>-0,62</b> | 1.34976778554994e-21 | <b>-0,07</b> | 0.364097650238115    |
| MAP2K6   | ENSG00000108984 | <b>-0,40</b> | 1.53752344947262e-08 | <b>0,19</b>  | 0.00843758230584174  |
| MAP2K7   | ENSG00000076984 | <b>0,64</b>  | 3.49620863487539e-23 | <b>-0,10</b> | 0.152819022261597    |
| MAP3K1   | ENSG00000095015 | <b>-0,59</b> | 2.14954752454161e-19 | <b>-0,38</b> | 5.75968519951562e-08 |
| MAP3K14  | ENSG00000006062 | <b>0,46</b>  | 1.93455883792861e-11 | <b>-0,23</b> | 0.00161677069109988  |
| MAP3K7   | ENSG00000135341 | <b>-0,35</b> | 6.39003437413233e-07 | <b>-0,01</b> | 0.867092351786451    |
| MAP3K8   | ENSG00000107968 | <b>-0,24</b> | 0.000771602514091049 | <b>-0,43</b> | 5.60752233400665e-10 |
| MAP4K1   | ENSG00000104814 | <b>0,19</b>  | 0.00926934558022212  | <b>-0,16</b> | 0.0250800474502605   |
| MAPK1    | ENSG00000100030 | <b>-0,60</b> | 2.99200936810869e-20 | <b>0,08</b>  | 0.251282465884628    |
| MAPK10   | ENSG00000109339 | <b>0,00</b>  | 0.962978066789964    | <b>0,63</b>  | 1.24976684735071e-22 |
| MAPK11   | ENSG00000185386 | <b>0,64</b>  | 1.33530520718186e-23 | <b>0,08</b>  | 0.268922126268205    |
| MAPK12   | ENSG00000188130 | <b>0,70</b>  | 3.25251537512553e-29 | <b>0,02</b>  | 0.772127715624114    |
| MAPK13   | ENSG00000156711 | <b>0,42</b>  | 2.1806270771068e-09  | <b>0,09</b>  | 0.206238498899922    |
| MAPK14   | ENSG00000112062 | <b>-0,44</b> | 1.17566206635571e-10 | <b>0,05</b>  | 0.507090038075621    |
| MAPK3    | ENSG00000102882 | <b>0,36</b>  | 2.87917061872028e-07 | <b>0,30</b>  | 2.0009180219269e-05  |
| MAPK7    | ENSG00000166484 | <b>0,49</b>  | 6.3630284280541e-13  | <b>-0,14</b> | 0.046384182889557    |
| MAPK8    | ENSG00000107643 | <b>-0,56</b> | 2.23804290203971e-17 | <b>-0,30</b> | 1.96903338705634e-05 |
| MAPK9    | ENSG00000050748 | <b>-0,46</b> | 1.64214884535091e-11 | <b>0,20</b>  | 0.00516805948761377  |
| MAPKAPK2 | ENSG00000162889 | <b>0,09</b>  | 0.217208145936071    | <b>-0,23</b> | 0.00163436054379597  |
| MAPKAPK3 | ENSG00000114738 | <b>-0,40</b> | 9.98193686266164e-09 | <b>-0,30</b> | 2.70847438766614e-05 |
| MAVS     | ENSG00000088888 | <b>0,04</b>  | 0.579983207901823    | <b>0,02</b>  | 0.83104014829524     |
| MCL1     | ENSG00000143384 | <b>-0,62</b> | 2.55283843795004e-21 | <b>-0,52</b> | 1.22181414236806e-14 |
| MCU      | ENSG00000156026 | <b>-0,46</b> | 2.78873038718332e-11 | <b>-0,12</b> | 0.0917992486347978   |
| MECOM    | ENSG00000085276 | <b>-0,54</b> | 6.6927597721106e-16  | <b>-0,39</b> | 3.04494273552936e-08 |
| MEF2A    | ENSG00000068305 | <b>-0,12</b> | 0.0970125648247134   | <b>0,36</b>  | 3.21453133657993e-07 |
| MEF2C    | ENSG00000081189 | <b>-0,32</b> | 5.17879565738277e-06 | <b>0,07</b>  | 0.362073670060379    |
| MEFV     | ENSG00000103313 | <b>0,09</b>  | 0.192965919970094    | <b>0,09</b>  | 0.230447139700035    |
| MFN1     | ENSG00000171109 | <b>-0,67</b> | 4.72366636761926e-26 | <b>-0,20</b> | 0.00445902590122448  |
| MFN2     | ENSG00000116688 | <b>-0,48</b> | 1.97963303230989e-12 | <b>0,07</b>  | 0.324564401772141    |

|        |                 |              |                      |              |                      |
|--------|-----------------|--------------|----------------------|--------------|----------------------|
| MKL1   | ENSG00000196588 | <b>0,12</b>  | 0.0901771134989606   | <b>-0,29</b> | 4.45200356614047e-05 |
| MLANA  | ENSG00000120215 | <b>-0,17</b> | 0.0185560094806087   | <b>0,08</b>  | 0.275706555347608    |
| MLST8  | ENSG00000167965 | <b>0,70</b>  | 6.58810809014195e-30 | <b>0,05</b>  | 0.49115449048096     |
| MPL    | ENSG00000117400 | <b>0,24</b>  | 0.000986450382894598 | <b>0,17</b>  | 0.0198430138589992   |
| MPO    | ENSG00000005381 | <b>0,11</b>  | 0.127206685393783    | <b>-0,08</b> | 0.265453735207945    |
| MTOR   | ENSG00000198793 | <b>-0,46</b> | 1.39801399115379e-11 | <b>0,03</b>  | 0.700528947537056    |
| MYB    | ENSG00000118513 | <b>-0,26</b> | 0.000353500865171918 | <b>-0,33</b> | 2.45512804537522e-06 |
| MYC    | ENSG00000136997 | <b>-0,17</b> | 0.0168645538571789   | <b>-0,49</b> | 3.93334794486251e-13 |
| MYD88  | ENSG00000172936 | <b>-0,63</b> | 1.30792485750974e-22 | <b>-0,47</b> | 7.90972736361841e-12 |
| NAIP   | ENSG00000249437 | <b>-0,15</b> | 0.0414780495721263   | <b>0,22</b>  | 0.00234598439617827  |
| NAMPT  | ENSG00000105835 | <b>-0,55</b> | 2.80614905607492e-16 | <b>-0,58</b> | 1.57004054808471e-18 |
| NCAM1  | ENSG00000149294 | <b>-0,05</b> | 0.490859806182678    | <b>0,47</b>  | 1.21484470358627e-11 |
| NCF1   | ENSG00000158517 | <b>0,10</b>  | 0.178866957148361    | <b>-0,10</b> | 0.156594679769947    |
| NCF4   | ENSG00000100365 | <b>0,15</b>  | 0.0389342502295355   | <b>-0,26</b> | 0.000310496186227933 |
| NCK1   | ENSG00000158092 | <b>-0,49</b> | 6.53802239141109e-13 | <b>-0,13</b> | 0.0666609316618826   |
| NDRG1  | ENSG00000104419 | <b>0,07</b>  | 0.34285519864896     | <b>0,10</b>  | 0.182211700758676    |
| NEK7   | ENSG00000151414 | <b>-0,50</b> | 3.30675191180202e-13 | <b>-0,09</b> | 0.215065227444383    |
| NFATC1 | ENSG00000131196 | <b>0,05</b>  | 0.485414685834601    | <b>-0,50</b> | 9.96576792227391e-14 |
| NFATC2 | ENSG00000101096 | <b>-0,14</b> | 0.0555556865480954   | <b>-0,05</b> | 0.453747745548718    |
| NFATC3 | ENSG00000072736 | <b>-0,59</b> | 2.06247756182526e-19 | <b>0,06</b>  | 0.448382179739784    |
| NFATC4 | ENSG00000100968 | <b>0,31</b>  | 1.1832082113729e-05  | <b>-0,01</b> | 0.883659976472231    |
| NFIL3  | ENSG00000165030 | <b>-0,50</b> | 1.03858930611913e-13 | <b>-0,39</b> | 2.45598804160981e-08 |
| NFKB1  | ENSG00000109320 | <b>-0,59</b> | 1.41337345847154e-19 | <b>-0,40</b> | 1.27178951836757e-08 |
| NFKB2  | ENSG00000077150 | <b>0,22</b>  | 0.00270211457539767  | <b>-0,42</b> | 1.95754158193685e-09 |
| NFKBIA | ENSG00000100906 | <b>-0,22</b> | 0.00228519241789342  | <b>-0,59</b> | 5.63470401469128e-19 |
| NFKBIB | ENSG00000104825 | <b>0,39</b>  | 3.51981854643213e-08 | <b>-0,19</b> | 0.00737618848454116  |
| NFKBIE | ENSG00000146232 | <b>0,27</b>  | 0.00017205593019912  | <b>-0,46</b> | 3.34329888230106e-11 |
| NFKBIZ | ENSG00000144802 | <b>-0,27</b> | 0.000209260576551246 | <b>-0,52</b> | 1.59179814485082e-14 |
| NLRC3  | ENSG00000167984 | <b>0,51</b>  | 3.59989646250484e-14 | <b>0,06</b>  | 0.449225544802749    |
| NLRC4  | ENSG00000091106 | <b>-0,25</b> | 0.00041205306661544  | <b>-0,03</b> | 0.656870791530623    |
| NLRC5  | ENSG00000140853 | <b>0,25</b>  | 0.000597976325727681 | <b>-0,31</b> | 1.17107390335828e-05 |
| NLRP1  | ENSG00000091592 | <b>0,77</b>  | 3.79719345912581e-38 | <b>0,37</b>  | 1.09255412687703e-07 |
| NLRP11 | ENSG00000179873 | <b>-0,23</b> | 0.00149190925976655  | <b>0,29</b>  | 3.89786051491714e-05 |
| NLRP14 | ENSG00000158077 | <b>-0,11</b> | 0.134218056054006    | <b>-0,03</b> | 0.701693109882654    |
| NLRP2  | ENSG00000022556 | <b>-0,19</b> | 0.00927056750753622  | <b>-0,06</b> | 0.376765102136367    |
| NLRP2B | ENSG00000215174 | <b>0,17</b>  | 0.0209262564937694   | <b>0,07</b>  | 0.357116883469357    |
| NLRP3  | ENSG00000162711 | <b>-0,10</b> | 0.19094381413985     | <b>0,13</b>  | 0.0798381199584165   |
| NLRP9  | ENSG00000185792 | <b>0,03</b>  | 0.671254925883758    | <b>-0,18</b> | 0.0113685271077864   |
| NLRX1  | ENSG00000160703 | <b>0,62</b>  | 2.53561542128123e-21 | <b>0,06</b>  | 0.393120541657589    |
| NOD1   | ENSG00000106100 | <b>0,31</b>  | 1.28556623781801e-05 | <b>-0,16</b> | 0.0233950677883959   |
| NOD2   | ENSG00000167207 | <b>-0,16</b> | 0.0271555303549858   | <b>-0,40</b> | 1.19593954178795e-08 |
| NOS2   | ENSG00000007171 | <b>0,04</b>  | 0.553775969547528    | <b>-0,01</b> | 0.849052646270222    |
| NQQ1   | ENSG00000181019 | <b>-0,16</b> | 0.0236421302308966   | <b>0,06</b>  | 0.432696285529527    |
| NR1D1  | ENSG00000126368 | <b>0,42</b>  | 1.32528821776255e-09 | <b>-0,11</b> | 0.128289219760083    |
| NR4A1  | ENSG00000123358 | <b>0,41</b>  | 3.24061388017239e-09 | <b>-0,16</b> | 0.0250101211685672   |
| NT5E   | ENSG00000135318 | <b>-0,42</b> | 9.43901683342149e-10 | <b>-0,29</b> | 3.50539193809275e-05 |
| OAS1   | ENSG00000089127 | <b>-0,15</b> | 0.0328201484234877   | <b>0,05</b>  | 0.480262960349265    |
| OAS2   | ENSG00000111335 | <b>-0,24</b> | 0.000864956449482526 | <b>-0,08</b> | 0.252654097541656    |
| OAS3   | ENSG00000111331 | <b>-0,26</b> | 0.000330722148169071 | <b>-0,14</b> | 0.0474655004707886   |
| OSM    | ENSG00000099985 | <b>0,24</b>  | 0.000652799939162351 | <b>-0,25</b> | 0.000431003212695394 |
| OSMR   | ENSG00000145623 | <b>-0,65</b> | 2.03919984970206e-24 | <b>-0,60</b> | 7.58445286554061e-20 |
| OTUD5  | ENSG00000068308 | <b>0,29</b>  | 6.14263040136555e-05 | <b>0,01</b>  | 0.87548682456972     |
| OTULIN | ENSG00000154124 | <b>-0,56</b> | 2.49292618845894e-17 | <b>-0,37</b> | 1.25137464427724e-07 |
| P2RX7  | ENSG00000089041 | <b>-0,33</b> | 3.85496202626781e-06 | <b>-0,15</b> | 0.0408852116686779   |
| PANX1  | ENSG00000110218 | <b>-0,63</b> | 2.26924415522877e-22 | <b>-0,34</b> | 1.65931159458679e-06 |
| PAWR   | ENSG00000177425 | <b>-0,51</b> | 8.34928734754634e-14 | <b>-0,34</b> | 1.93466025983374e-06 |
| PAX5   | ENSG00000196092 | <b>0,20</b>  | 0.00579142192396889  | <b>0,06</b>  | 0.409230878578268    |
| PBX1   | ENSG00000185630 | <b>-0,66</b> | 4.01668012801769e-25 | <b>-0,13</b> | 0.0842075528725004   |

|          |                 |              |                      |              |                      |
|----------|-----------------|--------------|----------------------|--------------|----------------------|
| PDCD1LG2 | ENSG00000197646 | <b>-0,37</b> | 1.27447973188059e-07 | <b>-0,04</b> | 0.562863902274061    |
| PDGFA    | ENSG00000197461 | <b>0,04</b>  | 0.626089165063433    | <b>-0,45</b> | 4.13858779805118e-11 |
| PDGFB    | ENSG00000100311 | <b>0,19</b>  | 0.0081006964117123   | <b>-0,15</b> | 0.0411937918306799   |
| PDGFRA   | ENSG00000134853 | <b>-0,34</b> | 1.69482491096601e-06 | <b>-0,17</b> | 0.0201033963368846   |
| PDGFRB   | ENSG00000113721 | <b>0,02</b>  | 0.827196848427399    | <b>0,19</b>  | 0.00836832573983567  |
| PDLIM2   | ENSG00000120913 | <b>0,74</b>  | 3.45372262845816e-34 | <b>0,14</b>  | 0.057930476284971    |
| PDXDC2P  | ENSG00000255185 | <b>0,29</b>  | 6.22932103964344e-05 | <b>-0,12</b> | 0.105482149605217    |
| PDXDC2P  | ENSG00000196696 | <b>0,26</b>  | 0.000215554292578816 | <b>-0,11</b> | 0.125199982222296    |
| PELI1    | ENSG00000197329 | <b>-0,38</b> | 4.34016196806095e-08 | <b>-0,13</b> | 0.0785560525101174   |
| PELI2    | ENSG00000139946 | <b>-0,33</b> | 3.06310669946723e-06 | <b>-0,24</b> | 0.000705477624879387 |
| PELI3    | ENSG00000174516 | <b>0,83</b>  | 1.58777613151634e-49 | <b>0,50</b>  | 2.80364309678431e-13 |
| PIAS1    | ENSG00000033800 | <b>-0,28</b> | 9.55460502211832e-05 | <b>0,38</b>  | 4.92018850220099e-08 |
| PIAS2    | ENSG00000078043 | <b>-0,26</b> | 0.00022405124725867  | <b>0,28</b>  | 0.000115020841347794 |
| PIAS3    | ENSG00000131788 | <b>0,19</b>  | 0.00845215288768675  | <b>0,13</b>  | 0.0730097499669709   |
| PIAS4    | ENSG00000105229 | <b>0,79</b>  | 2.5433816202907e-41  | <b>0,16</b>  | 0.0283593171943679   |
| PIK3C3   | ENSG00000078142 | <b>-0,65</b> | 2.72676581426382e-24 | <b>-0,08</b> | 0.259187632633284    |
| PIK3CA   | ENSG00000121879 | <b>-0,67</b> | 2.39529234700326e-26 | <b>-0,17</b> | 0.0210010819676031   |
| PIK3CB   | ENSG00000051382 | <b>-0,63</b> | 4.05405996223875e-22 | <b>-0,20</b> | 0.00456660588519594  |
| PIK3CD   | ENSG00000171608 | <b>0,29</b>  | 5.85616427793295e-05 | <b>-0,34</b> | 1.86148637990212e-06 |
| PIK3CG   | ENSG00000105851 | <b>-0,23</b> | 0.00110467851680458  | <b>0,09</b>  | 0.192800970725085    |
| PIK3R1   | ENSG00000145675 | <b>-0,70</b> | 4.94075866857068e-29 | <b>-0,09</b> | 0.19404408185396     |
| PIK3R2   | ENSG00000105647 | <b>0,77</b>  | 6.52792398222713e-39 | <b>0,42</b>  | 2.10515977066689e-09 |
| PIK3R3   | ENSG00000117461 | <b>-0,05</b> | 0.526593151012579    | <b>0,55</b>  | 1.10202969066579e-16 |
| PIK3R4   | ENSG00000196455 | <b>-0,51</b> | 8.92940035618747e-14 | <b>0,18</b>  | 0.0118004048728248   |
| PIK3R5   | ENSG00000141506 | <b>-0,26</b> | 0.00030486410290903  | <b>-0,22</b> | 0.00229483366082675  |
| PIM1     | ENSG00000137193 | <b>-0,17</b> | 0.0224194258620482   | <b>-0,53</b> | 1.66038013424789e-15 |
| PIM2     | ENSG00000102096 | <b>0,22</b>  | 0.00258716519275119  | <b>0,29</b>  | 4.84964694210049e-05 |
| PIM3     | ENSG00000198355 | <b>0,63</b>  | 8.71485578755993e-23 | <b>-0,11</b> | 0.144870122108829    |
| PIR      | ENSG00000087842 | <b>0,09</b>  | 0.212714082411612    | <b>0,35</b>  | 9.68201056300833e-07 |
| PLCB1    | ENSG00000182621 | <b>-0,35</b> | 8.1419133064092e-07  | <b>0,24</b>  | 0.000655213260053309 |
| PLCB2    | ENSG00000137841 | <b>0,02</b>  | 0.808882447332441    | <b>-0,08</b> | 0.257671521303034    |
| PLCB3    | ENSG00000149782 | <b>0,35</b>  | 5.27778453002387e-07 | <b>-0,21</b> | 0.00313949767236579  |
| PLCB4    | ENSG00000101333 | <b>0,20</b>  | 0.00662714513277555  | <b>0,62</b>  | 2.48298916295547e-21 |
| PLCG2    | ENSG00000197943 | <b>-0,16</b> | 0.0230647123569113   | <b>0,20</b>  | 0.00670425002113378  |
| PLK1     | ENSG00000166851 | <b>0,34</b>  | 1.50673321112083e-06 | <b>0,07</b>  | 0.338487565433572    |
| POLR2J4  | ENSG00000272655 | <b>0,28</b>  | 9.52155431834251e-05 | <b>-0,04</b> | 0.542454108967578    |
| POLR2J4  | ENSG00000214783 | <b>0,16</b>  | 0.0276471738470529   | <b>0,01</b>  | 0.87623141564244     |
| PPIA     | ENSG00000196262 | <b>-0,35</b> | 7.7201959368117e-07  | <b>-0,35</b> | 7.925141630842e-07   |
| PPP2CA   | ENSG00000113575 | <b>-0,41</b> | 2.75800443762301e-09 | <b>-0,09</b> | 0.232332134389138    |
| PPP2CB   | ENSG00000104695 | <b>-0,29</b> | 5.60647540573015e-05 | <b>0,32</b>  | 8.87827848932038e-06 |
| PPP2R1A  | ENSG00000105568 | <b>0,21</b>  | 0.00411510699179665  | <b>-0,04</b> | 0.595479890872361    |
| PPP2R1B  | ENSG00000137713 | <b>-0,56</b> | 2.64266607345147e-17 | <b>0,07</b>  | 0.329253344289962    |
| PPP2R2A  | ENSG00000221914 | <b>-0,59</b> | 2.19129426250063e-19 | <b>-0,22</b> | 0.00211556723369208  |
| PPP2R2B  | ENSG00000156475 | <b>-0,01</b> | 0.896499500443703    | <b>0,37</b>  | 1.66536338900677e-07 |
| PPP2R2C  | ENSG00000074211 | <b>0,36</b>  | 2.19762143759916e-07 | <b>0,70</b>  | 7.34023567340372e-30 |
| PPP2R2D  | ENSG00000175470 | <b>-0,02</b> | 0.753234688162031    | <b>-0,27</b> | 0.000141891395998047 |
| PPP2R5D  | ENSG00000112640 | <b>-0,59</b> | 5.11323513896183e-19 | <b>-0,05</b> | 0.533061354004436    |
| PPP3CA   | ENSG00000138814 | <b>-0,63</b> | 3.47699012017508e-22 | <b>0,05</b>  | 0.457649845983456    |
| PPP3CB   | ENSG00000107758 | <b>-0,21</b> | 0.00431500877194442  | <b>0,47</b>  | 7.94593162044097e-12 |
| PPP3CC   | ENSG00000120910 | <b>-0,18</b> | 0.0146576693605873   | <b>-0,11</b> | 0.127603654675323    |
| PRDM1    | ENSG00000057657 | <b>-0,14</b> | 0.0468846090467221   | <b>-0,03</b> | 0.718980336151392    |
| PRKCD    | ENSG00000163932 | <b>-0,35</b> | 8.07477316843992e-07 | <b>-0,18</b> | 0.0106597716713838   |
| PRKCQ    | ENSG00000065675 | <b>-0,39</b> | 2.69572524203856e-08 | <b>0,08</b>  | 0.283721721238615    |
| PRLR     | ENSG00000113494 | <b>-0,35</b> | 4.78539784286799e-07 | <b>0,25</b>  | 0.000489188291246032 |
| PSIP1    | ENSG00000164985 | <b>0,12</b>  | 0.107902057450008    | <b>0,51</b>  | 3.12756893040823e-14 |
| PSMB8    | ENSG00000204264 | <b>-0,61</b> | 3.10896602614374e-21 | <b>-0,37</b> | 1.56551206915383e-07 |
| PSTPIP1  | ENSG00000140368 | <b>0,21</b>  | 0.00308693426500499  | <b>-0,18</b> | 0.0150606510591915   |
| PTGS1    | ENSG00000095303 | <b>-0,29</b> | 5.40111873845437e-05 | <b>-0,04</b> | 0.538575963245348    |

|          |                 |              |                      |              |                      |
|----------|-----------------|--------------|----------------------|--------------|----------------------|
| PTGS2    | ENSG00000073756 | <b>-0,37</b> | 1.06202411715418e-07 | <b>-0,41</b> | 5.66990919222164e-09 |
| PTK2B    | ENSG00000120899 | <b>0,18</b>  | 0.0104280244768455   | <b>-0,09</b> | 0.227088637359813    |
| PTPN11   | ENSG00000179295 | <b>-0,44</b> | 2.83742915818007e-10 | <b>0,19</b>  | 0.00849151413351793  |
| PTPN2    | ENSG00000175354 | <b>-0,40</b> | 8.0158053878309e-09  | <b>-0,56</b> | 7.30794410228303e-17 |
| PTPN22   | ENSG00000134242 | <b>-0,18</b> | 0.011600198237508    | <b>-0,37</b> | 1.18438543700136e-07 |
| PTPN4    | ENSG00000088179 | <b>-0,21</b> | 0.00283288659587911  | <b>0,44</b>  | 1.43557137760863e-10 |
| PTPN6    | ENSG00000111679 | <b>0,28</b>  | 9.07159554868796e-05 | <b>-0,09</b> | 0.193182499885867    |
| PTPRC    | ENSG00000081237 | <b>-0,40</b> | 1.48074898772267e-08 | <b>-0,12</b> | 0.0917501247852444   |
| PVR      | ENSG00000073008 | <b>-0,32</b> | 5.0344876713875e-06  | <b>-0,04</b> | 0.561130995151631    |
| PYCARD   | ENSG00000103490 | <b>0,50</b>  | 9.96104671154407e-14 | <b>-0,16</b> | 0.0309530348574785   |
| RABGEF1  | ENSG00000154710 | <b>-0,49</b> | 8.24379333868165e-13 | <b>-0,16</b> | 0.0278681982138999   |
| RAC1     | ENSG00000136238 | <b>-0,57</b> | 4.08102412241896e-18 | <b>-0,25</b> | 0.000530049895111784 |
| RAF1     | ENSG00000132155 | <b>-0,63</b> | 2.07438219146617e-22 | <b>-0,58</b> | 2.05221822580788e-18 |
| RAG1     | ENSG00000166349 | <b>-0,45</b> | 6.08272380941514e-11 | <b>-0,16</b> | 0.0321046862483524   |
| RBCK1    | ENSG00000125826 | <b>0,71</b>  | 6.96471927151766e-31 | <b>-0,07</b> | 0.365753386050884    |
| RBSN     | ENSG00000131381 | <b>-0,46</b> | 1.86209090958448e-11 | <b>-0,18</b> | 0.0150670795713591   |
| REL      | ENSG00000162924 | <b>-0,52</b> | 7.85048830110015e-15 | <b>-0,14</b> | 0.0478115197701923   |
| RELA     | ENSG00000173039 | <b>0,33</b>  | 2.60509100663762e-06 | <b>-0,32</b> | 4.81257582740091e-06 |
| RELB     | ENSG00000104856 | <b>0,34</b>  | 1.49315930795871e-06 | <b>-0,40</b> | 1.15561076208071e-08 |
| RGS5     | ENSG00000232995 | <b>-0,20</b> | 0.00511519707968173  | <b>0,20</b>  | 0.00501735236093705  |
| RGS5     | ENSG00000143248 | <b>-0,07</b> | 0.322589926695806    | <b>0,27</b>  | 0.000136253917536132 |
| RHOA     | ENSG00000067560 | <b>-0,62</b> | 6.80393236968241e-22 | <b>-0,14</b> | 0.046709148538254    |
| RIPK1    | ENSG00000137275 | <b>-0,55</b> | 8.4800183856022e-17  | <b>-0,05</b> | 0.461793480056313    |
| RIPK2    | ENSG00000104312 | <b>-0,40</b> | 7.76508291623069e-09 | <b>-0,59</b> | 4.30641191933855e-19 |
| RIPK3    | ENSG00000129465 | <b>-0,20</b> | 0.00530966421272976  | <b>-0,42</b> | 1.15219531942584e-09 |
| RIPK4    | ENSG00000183421 | <b>0,19</b>  | 0.00701996578783995  | <b>-0,39</b> | 2.91388919950574e-08 |
| RNASEL   | ENSG00000135828 | <b>-0,23</b> | 0.00109628575311977  | <b>0,14</b>  | 0.060581002434791    |
| RNF216   | ENSG00000011275 | <b>0,32</b>  | 6.44379989509249e-06 | <b>0,33</b>  | 2.97326583175837e-06 |
| RNF31    | ENSG00000092098 | <b>0,46</b>  | 1.53494275615763e-11 | <b>-0,10</b> | 0.150092128414363    |
| RNF41    | ENSG00000181852 | <b>-0,56</b> | 6.53825979785689e-17 | <b>0,20</b>  | 0.0068272826776972   |
| RPS27A   | ENSG00000143947 | <b>-0,52</b> | 1.29280938389443e-14 | <b>-0,34</b> | 1.10727580600848e-06 |
| RPS6KA1  | ENSG00000117676 | <b>-0,21</b> | 0.00328909032437553  | <b>-0,31</b> | 1.20130711451515e-05 |
| RPS6KA2  | ENSG00000071242 | <b>-0,16</b> | 0.031317578899912    | <b>-0,32</b> | 5.31640212754824e-06 |
| RPS6KA3  | ENSG00000177189 | <b>-0,41</b> | 3.9799424436064e-09  | <b>0,12</b>  | 0.0850318783976356   |
| RPS6KA5  | ENSG00000100784 | <b>-0,44</b> | 2.27624067378863e-10 | <b>-0,45</b> | 9.60597349232598e-11 |
| RSAD2    | ENSG00000134321 | <b>-0,22</b> | 0.00234969317224505  | <b>-0,19</b> | 0.00789868450016011  |
| RUNX1    | ENSG00000159216 | <b>-0,30</b> | 3.01060398236867e-05 | <b>-0,43</b> | 5.66165960110254e-10 |
| RUNX1T1  | ENSG00000079102 | <b>0,17</b>  | 0.0222667162006569   | <b>0,62</b>  | 8.90606786893307e-22 |
| S100A1   | ENSG00000160678 | <b>-0,04</b> | 0.544275767089726    | <b>-0,48</b> | 3.30346661762165e-12 |
| S100A8   | ENSG00000143546 | <b>-0,31</b> | 1.25854553582187e-05 | <b>-0,22</b> | 0.00253496444159315  |
| S100A9   | ENSG00000163220 | <b>-0,20</b> | 0.00505988928443025  | <b>-0,27</b> | 0.000163823407430586 |
| S100B    | ENSG00000160307 | <b>-0,12</b> | 0.104800630357125    | <b>0,24</b>  | 0.000667004503289965 |
| SAA1     | ENSG00000173432 | <b>-0,20</b> | 0.00533019861105571  | <b>-0,17</b> | 0.0223168546849501   |
| SARM1    | ENSG00000004139 | <b>0,11</b>  | 0.123602079181675    | <b>0,63</b>  | 2.84561714161296e-22 |
| SERPINA3 | ENSG00000273259 | <b>-0,42</b> | 1.42104706249298e-09 | <b>-0,43</b> | 3.27873039927722e-10 |
| SERPINA3 | ENSG00000196136 | <b>-0,42</b> | 1.56808288090945e-09 | <b>-0,43</b> | 3.22480254445208e-10 |
| SERPINE1 | ENSG00000106366 | <b>-0,09</b> | 0.219204800193226    | <b>-0,03</b> | 0.69413671922963     |
| SFTPA2   | ENSG00000185303 | <b>-0,04</b> | 0.556341807577317    | <b>-0,06</b> | 0.406750710791915    |
| SFTPD    | ENSG00000133661 | <b>0,52</b>  | 1.46662444808833e-14 | <b>0,26</b>  | 0.000358339964913249 |
| SH3KBP1  | ENSG00000147010 | <b>0,01</b>  | 0.861054227655836    | <b>0,48</b>  | 3.3164529146065e-12  |
| SHARPIN  | ENSG00000179526 | <b>0,71</b>  | 2.07361837377747e-30 | <b>-0,03</b> | 0.649870036329941    |
| SIGIRR   | ENSG00000185187 | <b>0,63</b>  | 1.19898285030601e-22 | <b>-0,14</b> | 0.0466520513360271   |
| SIRPA    | ENSG00000198053 | <b>-0,28</b> | 0.00010853234303029  | <b>-0,51</b> | 4.221396093417e-14   |
| SIVA1    | ENSG00000184990 | <b>0,57</b>  | 5.10946045058438e-18 | <b>-0,09</b> | 0.233043809474865    |
| SKP1     | ENSG00000113558 | <b>-0,62</b> | 1.19710147539641e-21 | <b>-0,09</b> | 0.199328127159309    |
| SMAD2    | ENSG00000175387 | <b>-0,62</b> | 2.55757344303848e-21 | <b>0,01</b>  | 0.901783263914251    |
| SMAD3    | ENSG00000166949 | <b>-0,52</b> | 1.32561383824166e-14 | <b>-0,68</b> | 6.22028241866963e-27 |
| SMAD6    | ENSG00000137834 | <b>0,56</b>  | 3.36394232638854e-17 | <b>-0,05</b> | 0.518355878742066    |

|         |                 |              |                      |              |                      |
|---------|-----------------|--------------|----------------------|--------------|----------------------|
| SNORA31 | ENSG00000253051 | <b>0,08</b>  | 0.247884241060087    | <b>-0,36</b> | 2.27528053925494e-07 |
| SNORA31 | ENSG00000199477 | <b>0,14</b>  | 0.0458869844227978   | <b>-0,03</b> | 0.665768994204159    |
| SOCS1   | ENSG00000185338 | <b>0,62</b>  | 1.13362876375065e-21 | <b>-0,11</b> | 0.135148843402378    |
| SOCS2   | ENSG00000120833 | <b>0,17</b>  | 0.0169989833644122   | <b>-0,07</b> | 0.325388859958781    |
| SOCS3   | ENSG00000184557 | <b>0,24</b>  | 0.000917143429051332 | <b>-0,39</b> | 1.89577019821364e-08 |
| SOCS4   | ENSG00000180008 | <b>-0,42</b> | 1.09908953291492e-09 | <b>0,15</b>  | 0.0337534242591804   |
| SOCS5   | ENSG00000171150 | <b>-0,34</b> | 1.16229795500811e-06 | <b>0,28</b>  | 7.78587049118092e-05 |
| SOCS6   | ENSG00000170677 | <b>-0,45</b> | 5.81029926580992e-11 | <b>0,24</b>  | 0.000833671270241291 |
| SOS1    | ENSG00000115904 | <b>-0,51</b> | 7.07731058980343e-14 | <b>0,18</b>  | 0.013979692177311    |
| SOS2    | ENSG00000100485 | <b>-0,30</b> | 3.29676387364346e-05 | <b>0,23</b>  | 0.00166593904360047  |
| SPATA13 | ENSG00000228741 | <b>-0,11</b> | 0.114114781230806    | <b>-0,49</b> | 6.85317565706166e-13 |
| SPATA13 | ENSG00000182957 | <b>-0,25</b> | 0.000460265723198588 | <b>0,19</b>  | 0.00703600084024159  |
| SPI1    | ENSG00000066336 | <b>0,49</b>  | 9.08606474832705e-13 | <b>-0,10</b> | 0.173284886774545    |
| SPIB    | ENSG00000269404 | <b>-0,18</b> | 0.0115329434489913   | <b>-0,23</b> | 0.00116526772643817  |
| SPP1    | ENSG00000118785 | <b>-0,42</b> | 9.37489933209361e-10 | <b>-0,24</b> | 0.00104613032082141  |
| SQSTM1  | ENSG00000161011 | <b>0,34</b>  | 1.0468206756078e-06  | <b>-0,26</b> | 0.000240691537685364 |
| SRC     | ENSG00000197122 | <b>0,08</b>  | 0.262402472097997    | <b>-0,39</b> | 2.39005445263932e-08 |
| STAM    | ENSG00000136738 | <b>-0,57</b> | 9.13107670527743e-18 | <b>-0,02</b> | 0.816272844952455    |
| STAM2   | ENSG00000115145 | <b>-0,60</b> | 2.25232612953512e-20 | <b>-0,03</b> | 0.729233553337462    |
| STAT1   | ENSG00000115415 | <b>-0,46</b> | 1.4084182737644e-11  | <b>0,08</b>  | 0.270253906811317    |
| STAT2   | ENSG00000170581 | <b>-0,39</b> | 1.74298679914003e-08 | <b>0,06</b>  | 0.42665854407596     |
| STAT3   | ENSG00000168610 | <b>-0,46</b> | 1.24763123118793e-11 | <b>0,13</b>  | 0.0793916043044484   |
| STAT4   | ENSG00000138378 | <b>-0,02</b> | 0.759118455330614    | <b>0,47</b>  | 5.63943268292532e-12 |
| STAT5A  | ENSG00000126561 | <b>-0,17</b> | 0.0193706168094797   | <b>-0,35</b> | 8.63634668143367e-07 |
| STAT5B  | ENSG00000173757 | <b>-0,08</b> | 0.246635997702101    | <b>0,18</b>  | 0.0130559703411971   |
| STAT6   | ENSG00000166888 | <b>-0,25</b> | 0.000617279201061092 | <b>-0,34</b> | 1.44452420385678e-06 |
| STK17B  | ENSG00000081320 | <b>-0,67</b> | 4.88516918811407e-26 | <b>-0,35</b> | 5.42276731686786e-07 |
| SUGT1   | ENSG00000165416 | <b>-0,45</b> | 1.0266721425207e-10  | <b>0,20</b>  | 0.00462187129620602  |
| SWAP70  | ENSG00000133789 | <b>-0,55</b> | 3.07766839648613e-16 | <b>-0,27</b> | 0.000206665166274767 |
| SYK     | ENSG00000165025 | <b>-0,56</b> | 2.27291333125735e-17 | <b>-0,24</b> | 0.000919588522465793 |
| TAB1    | ENSG00000100324 | <b>0,63</b>  | 1.28386119895019e-22 | <b>0,03</b>  | 0.66563699546499     |
| TAB2    | ENSG00000055208 | <b>-0,41</b> | 5.05079019304517e-09 | <b>0,04</b>  | 0.573441685779374    |
| TAB3    | ENSG00000157625 | <b>-0,52</b> | 1.75063160477548e-14 | <b>0,01</b>  | 0.939505621197513    |
| TAL1    | ENSG00000162367 | <b>-0,07</b> | 0.37045006164026     | <b>0,07</b>  | 0.349444553036844    |
| TANK    | ENSG00000136560 | <b>-0,76</b> | 7.68308912814543e-38 | <b>-0,31</b> | 1.21568714013484e-05 |
| TAP1    | ENSG00000168394 | <b>-0,42</b> | 1.73146238727583e-09 | <b>-0,44</b> | 2.13727148818295e-10 |
| TAP2    | ENSG00000204267 | <b>-0,23</b> | 0.00158640560243182  | <b>-0,34</b> | 1.24471165672954e-06 |
| TAX1BP1 | ENSG00000106052 | <b>-0,55</b> | 1.28351384299721e-16 | <b>-0,07</b> | 0.328172593866926    |
| TBC1D26 | ENSG00000255104 | <b>-0,65</b> | 2.55270312189865e-24 | <b>-0,20</b> | 0.00536225046447314  |
| TBC1D26 | ENSG00000214946 | <b>0,10</b>  | 0.154786928924414    | <b>-0,24</b> | 0.00099466939695812  |
| TBK1    | ENSG00000183735 | <b>-0,29</b> | 3.91972671249438e-05 | <b>-0,17</b> | 0.0192847214049868   |
| TBKBP1  | ENSG00000198933 | <b>0,64</b>  | 5.27569005744411e-23 | <b>0,00</b>  | 0.946312658712726    |
| TCF12   | ENSG00000140262 | <b>-0,69</b> | 8.56951339569049e-29 | <b>-0,29</b> | 5.87131551934035e-05 |
| TCF3    | ENSG00000071564 | <b>0,66</b>  | 5.76092112247012e-25 | <b>-0,11</b> | 0.145046310025324    |
| TEC     | ENSG00000135605 | <b>0,04</b>  | 0.620873521725902    | <b>0,27</b>  | 0.000198382251602702 |
| TGFB1   | ENSG00000105329 | <b>0,55</b>  | 1.32308433819893e-16 | <b>0,01</b>  | 0.897066530135416    |
| TGFB2   | ENSG00000092969 | <b>-0,54</b> | 9.97863508641403e-16 | <b>-0,46</b> | 2.26000359991139e-11 |
| TGFB3   | ENSG00000119699 | <b>-0,24</b> | 0.000852620116120712 | <b>-0,04</b> | 0.609803092435416    |
| TGFBR1  | ENSG00000106799 | <b>-0,67</b> | 1.20734362266116e-26 | <b>-0,20</b> | 0.00549665146022675  |
| TGFBR2  | ENSG00000163513 | <b>-0,65</b> | 1.38394975434637e-24 | <b>-0,46</b> | 2.20891995244439e-11 |
| THPO    | ENSG00000090534 | <b>-0,15</b> | 0.0443482032489941   | <b>-0,23</b> | 0.00149823615820835  |
| TICAM1  | ENSG00000127666 | <b>0,63</b>  | 1.40496099616993e-22 | <b>-0,10</b> | 0.149260318141619    |
| TICAM2  | ENSG00000243414 | <b>0,06</b>  | 0.413887218692825    | <b>0,09</b>  | 0.22107127916853     |
| TIFA    | ENSG00000145365 | <b>-0,55</b> | 1.91314569465526e-16 | <b>-0,47</b> | 1.07063946067422e-11 |
| TIRAP   | ENSG00000150455 | <b>-0,24</b> | 0.00087036894631872  | <b>0,11</b>  | 0.12756277882149     |
| TLR1    | ENSG00000174125 | <b>-0,57</b> | 6.01430176187931e-18 | <b>-0,43</b> | 3.42971134324157e-10 |
| TLR2    | ENSG00000137462 | <b>-0,48</b> | 2.96617868898488e-12 | <b>-0,48</b> | 2.71067384522745e-12 |
| TLR3    | ENSG00000164342 | <b>-0,47</b> | 4.00939827290733e-12 | <b>-0,39</b> | 2.31978643767263e-08 |

|                    |                 |              |                      |              |                      |
|--------------------|-----------------|--------------|----------------------|--------------|----------------------|
| TLR4               | ENSG00000136869 | <b>-0,43</b> | 7.82742680718726e-10 | <b>-0,07</b> | 0.357624727027409    |
| TLR5               | ENSG00000187554 | <b>-0,26</b> | 0.00029403815219429  | <b>0,18</b>  | 0.0126212081739423   |
| TLR6               | ENSG00000174130 | <b>-0,50</b> | 1.11449961999442e-13 | <b>-0,30</b> | 2.30339759335871e-05 |
| TLR7               | ENSG00000196664 | <b>-0,13</b> | 0.0772145115191967   | <b>0,21</b>  | 0.00436660461831649  |
| TLR8               | ENSG00000101916 | <b>-0,28</b> | 8.38399939393977e-05 | <b>-0,04</b> | 0.553864088023912    |
| TLR9               | ENSG00000239732 | <b>0,65</b>  | 1.96293418717653e-24 | <b>-0,09</b> | 0.22292155485444     |
| TMED7              | ENSG00000134970 | <b>-0,39</b> | 3.80253336262601e-08 | <b>0,09</b>  | 0.227115529052119    |
| TMEM173            | ENSG00000184584 | <b>-0,11</b> | 0.11548464364466     | <b>-0,11</b> | 0.123682115112946    |
| TMEM256-<br>PLSCR3 | ENSG00000262481 | <b>0,57</b>  | 7.47453548257485e-18 | <b>-0,08</b> | 0.279757496240658    |
| TNF                | ENSG00000232810 | <b>-0,17</b> | 0.0219343961824148   | <b>-0,33</b> | 2.27682620675884e-06 |
| TNFAIP3            | ENSG00000118503 | <b>-0,35</b> | 5.59862265015102e-07 | <b>-0,54</b> | 1.00186587810008e-15 |
| TNFRSF10B          | ENSG00000120889 | <b>-0,48</b> | 1.29409164237683e-12 | <b>-0,67</b> | 5.94046739263928e-26 |
| TNFRSF10D          | ENSG00000173530 | <b>-0,38</b> | 4.88693380823324e-08 | <b>-0,52</b> | 7.97519224952918e-15 |
| TNFRSF11A          | ENSG00000141655 | <b>-0,05</b> | 0.530375301551475    | <b>0,18</b>  | 0.0148482737165256   |
| TNFRSF12A          | ENSG00000006327 | <b>0,44</b>  | 1.33906626529597e-10 | <b>-0,32</b> | 7.51562673086217e-06 |
| TNFRSF18           | ENSG00000186891 | <b>0,53</b>  | 2.66139092572026e-15 | <b>-0,07</b> | 0.343631083939922    |
| TNFRSF1A           | ENSG00000067182 | <b>0,16</b>  | 0.0249198701319338   | <b>-0,31</b> | 1.15091426619657e-05 |
| TNFRSF1B           | ENSG00000028137 | <b>-0,06</b> | 0.404942955135092    | <b>-0,14</b> | 0.0477794458894424   |
| TNFRSF25           | ENSG00000215788 | <b>0,43</b>  | 6.47770095024338e-10 | <b>-0,11</b> | 0.114125196411887    |
| TNFRSF4            | ENSG00000186827 | <b>0,74</b>  | 2.16882986031124e-34 | <b>0,04</b>  | 0.571010011360076    |
| TNFRSF9            | ENSG00000049249 | <b>-0,50</b> | 1.0070028517877e-13  | <b>-0,35</b> | 8.87565160868024e-07 |
| TNFSF11            | ENSG00000120659 | <b>-0,38</b> | 5.60512313684955e-08 | <b>-0,35</b> | 7.11257109015937e-07 |
| TNFSF12            | ENSG00000239697 | <b>0,47</b>  | 6.09118885732618e-12 | <b>0,05</b>  | 0.534358536366696    |
| TNFSF13B           | ENSG00000102524 | <b>0,03</b>  | 0.671849702058623    | <b>-0,15</b> | 0.0449051433756027   |
| TNFSF15            | ENSG00000181634 | <b>-0,43</b> | 5.7751199031524e-10  | <b>-0,24</b> | 0.000762369856125732 |
| TNFSF4             | ENSG00000117586 | <b>-0,05</b> | 0.513552135998122    | <b>0,52</b>  | 2.33517396890738e-14 |
| TNIP1              | ENSG00000145901 | <b>-0,22</b> | 0.00215420269830205  | <b>-0,59</b> | 1.57503796869035e-19 |
| TNIP2              | ENSG00000168884 | <b>0,55</b>  | 2.95516914995812e-16 | <b>-0,21</b> | 0.00359823075359182  |
| TOLLIP             | ENSG00000078902 | <b>0,83</b>  | 5.81664600081825e-50 | <b>0,27</b>  | 0.000184423083762339 |
| TP53BP1            | ENSG00000067369 | <b>-0,20</b> | 0.00531588663163381  | <b>0,39</b>  | 2.75096101094694e-08 |
| TPT1               | ENSG00000133112 | <b>-0,39</b> | 3.31226952720264e-08 | <b>-0,50</b> | 1.69911809584445e-13 |
| TRAF1              | ENSG00000056558 | <b>-0,13</b> | 0.0707500888507634   | <b>-0,39</b> | 2.73710498021346e-08 |
| TRAF2              | ENSG00000127191 | <b>0,62</b>  | 1.04382589432806e-21 | <b>-0,03</b> | 0.656224728116167    |
| TRAF3              | ENSG00000131323 | <b>0,56</b>  | 1.74566636174895e-17 | <b>0,09</b>  | 0.213743615770432    |
| TRAF4              | ENSG00000076604 | <b>0,07</b>  | 0.313277913045204    | <b>-0,47</b> | 1.04511786810452e-11 |
| TRAF5              | ENSG00000082512 | <b>-0,37</b> | 1.13034719455547e-07 | <b>-0,49</b> | 6.58968530301118e-13 |
| TRAF6              | ENSG00000175104 | <b>-0,55</b> | 8.75714446453464e-17 | <b>-0,03</b> | 0.708375135881821    |
| TRAFD1             | ENSG00000135148 | <b>-0,58</b> | 8.92714741918826e-19 | <b>-0,05</b> | 0.483350418355343    |
| TREM1              | ENSG00000124731 | <b>-0,39</b> | 2.09092730512601e-08 | <b>-0,22</b> | 0.00217552454830663  |
| TRIB2              | ENSG00000071575 | <b>-0,32</b> | 5.05930330302539e-06 | <b>-0,48</b> | 1.89950400634015e-12 |
| TRIM25             | ENSG00000121060 | <b>-0,52</b> | 6.71996864034073e-15 | <b>-0,21</b> | 0.00382735405395848  |
| TRIP6              | ENSG00000087077 | <b>0,43</b>  | 3.80635878458557e-10 | <b>-0,33</b> | 2.47686065145311e-06 |
| TRPM2              | ENSG00000142185 | <b>0,67</b>  | 6.21692865447595e-26 | <b>0,20</b>  | 0.00604580854014028  |
| TRPM7              | ENSG00000092439 | <b>-0,38</b> | 5.69896213563714e-08 | <b>0,09</b>  | 0.20934193375527     |
| TRPV2              | ENSG00000187688 | <b>-0,03</b> | 0.713864705847724    | <b>0,14</b>  | 0.0582557052241475   |
| TSLP               | ENSG00000145777 | <b>-0,23</b> | 0.00115323266128778  | <b>-0,18</b> | 0.0121142857078653   |
| TXN                | ENSG00000136810 | <b>-0,49</b> | 9.00540109003706e-13 | <b>-0,44</b> | 1.64371614728299e-10 |
| TXN2               | ENSG00000100348 | <b>-0,26</b> | 0.000244419731624454 | <b>0,00</b>  | 0.955036399521385    |
| TYK2               | ENSG00000105397 | <b>0,65</b>  | 1.55184202437123e-24 | <b>-0,02</b> | 0.769230270167196    |
| TYROBP             | ENSG00000011600 | <b>0,36</b>  | 4.21023261915518e-07 | <b>-0,08</b> | 0.271242022897435    |
| U3                 | ENSG00000221496 | <b>0,34</b>  | 1.53928303647714e-06 | <b>0,00</b>  | 0.967154102852758    |
| U3                 | ENSG00000200693 | <b>0,14</b>  | 0.0496575518679295   | <b>0,04</b>  | 0.53664472683544     |
| UBA52              | ENSG00000221983 | <b>-0,72</b> | 1.86618598734546e-31 | <b>-0,24</b> | 0.000873939378966847 |
| UBB                | ENSG00000170315 | <b>-0,59</b> | 2.50119210933739e-19 | <b>0,14</b>  | 0.0625638107445379   |
| UBC                | ENSG00000150991 | <b>-0,56</b> | 2.78723123981906e-17 | <b>-0,07</b> | 0.364084254050423    |
| UBD                | ENSG00000213886 | <b>-0,42</b> | 1.28937273192377e-09 | <b>-0,29</b> | 3.87750622045804e-05 |
| UBE2D1             | ENSG00000072401 | <b>-0,17</b> | 0.0223304402788047   | <b>-0,37</b> | 1.48904201358508e-07 |

|         |                 |              |                      |              |                      |
|---------|-----------------|--------------|----------------------|--------------|----------------------|
| UBE2D2  | ENSG00000131508 | <b>-0,12</b> | 0.0896614230489009   | <b>-0,02</b> | 0.767514104162234    |
| UBE2D3  | ENSG00000109332 | <b>-0,45</b> | 7.80311120389263e-11 | <b>-0,11</b> | 0.116257490538917    |
| UBE2N   | ENSG00000177889 | <b>-0,67</b> | 2.73300126693736e-26 | <b>-0,03</b> | 0.639894938211311    |
| UBE2V1  | ENSG00000244687 | <b>-0,76</b> | 4.52754229365559e-37 | <b>-0,16</b> | 0.0243507130100157   |
| USP15   | ENSG00000135655 | <b>-0,73</b> | 3.24866889647988e-33 | <b>-0,29</b> | 4.94735408754956e-05 |
| USP7    | ENSG00000187555 | <b>-0,38</b> | 5.65757832222714e-08 | <b>0,11</b>  | 0.128899796540657    |
| VCAM1   | ENSG00000162692 | <b>-0,49</b> | 9.16998464331095e-13 | <b>-0,39</b> | 1.73018586390805e-08 |
| VDAC1   | ENSG00000213585 | <b>-0,69</b> | 3.82012204638129e-28 | <b>-0,25</b> | 0.000609366405616976 |
| VDAC2   | ENSG00000165637 | <b>-0,13</b> | 0.0816138286832395   | <b>-0,38</b> | 4.87736643155976e-08 |
| VDAC3   | ENSG00000078668 | <b>-0,57</b> | 3.79182614906668e-18 | <b>0,04</b>  | 0.5446635006983      |
| VRK3    | ENSG00000105053 | <b>-0,26</b> | 0.000311817662092865 | <b>-0,05</b> | 0.479118600266547    |
| VTCN1   | ENSG00000134258 | <b>-0,40</b> | 9.66088260352251e-09 | <b>-0,22</b> | 0.00215505844841412  |
| XIAP    | ENSG00000101966 | <b>-0,59</b> | 6.25035150733446e-19 | <b>0,16</b>  | 0.027976270689277    |
| XRCC5   | ENSG00000079246 | <b>-0,71</b> | 3.34902387285549e-30 | <b>-0,07</b> | 0.346423064836956    |
| ZAP70   | ENSG00000115085 | <b>0,31</b>  | 9.52484863713989e-06 | <b>-0,18</b> | 0.0119483164628887   |
| ZBTB16  | ENSG00000109906 | <b>0,25</b>  | 0.000452757101184267 | <b>-0,08</b> | 0.287115434266541    |
| ZBTB7B  | ENSG00000160685 | <b>0,62</b>  | 7.74804102458198e-22 | <b>-0,08</b> | 0.258840781459306    |
| ZMYND11 | ENSG00000015171 | <b>-0,34</b> | 1.53816901969717e-06 | <b>0,38</b>  | 6.51149115865463e-08 |

Table S3A

**MAFA and MAFB co-expression correlations with T1D risk genes**

| Genename | GeneID          | MAFA_GC      | P-value              | MAFB_GC      | P-value              |
|----------|-----------------|--------------|----------------------|--------------|----------------------|
| AFF3     | ENSG00000144218 | <b>-0,02</b> | 0.734867579441171    | <b>0,14</b>  | 0.0617982796618209   |
| BACH2    | ENSG00000112182 | <b>-0,29</b> | 4.57520038667183e-05 | <b>-0,41</b> | 5.2898841627837e-09  |
| C1QTNF6  | ENSG00000133466 | <b>0,43</b>  | 5.07288584424574e-10 | <b>0,27</b>  | 0.000127948621652364 |
| CCR5     | ENSG00000160791 | <b>-0,38</b> | 5.16932265268277e-08 | <b>-0,03</b> | 0.706147121741022    |
| CD226    | ENSG00000150637 | <b>-0,19</b> | 0.00690819876364436  | <b>-0,03</b> | 0.69068251339251     |
| CD69     | ENSG00000110848 | <b>-0,28</b> | 0.00011151243749079  | <b>-0,23</b> | 0.00166527346414262  |
| CENPW    | ENSG00000203760 | <b>-0,34</b> | 2.02994096538379e-06 | <b>-0,07</b> | 0.338263538815517    |
| CLEC16A  | ENSG00000038532 | <b>0,16</b>  | 0.0317948087309315   | <b>0,04</b>  | 0.542532144507101    |
| COBL     | ENSG00000106078 | <b>0,04</b>  | 0.5766368100334      | <b>0,28</b>  | 8.63092428279222e-05 |
| CPE      | ENSG00000109472 | <b>-0,06</b> | 0.441702555351971    | <b>0,59</b>  | 1.3103850390649e-19  |
| CTRB1    | ENSG00000168925 | <b>0,46</b>  | 2.04103615890964e-11 | <b>-0,28</b> | 7.12248942709951e-05 |
| CTSH     | ENSG00000103811 | <b>-0,10</b> | 0.166599491184495    | <b>-0,31</b> | 9.08146686157259e-06 |
| CYP27B1  | ENSG00000111012 | <b>-0,11</b> | 0.136648414210512    | <b>-0,50</b> | 2.69966966275471e-13 |
| DLK1     | ENSG00000185559 | <b>0,66</b>  | 2.68850311428816e-25 | <b>0,20</b>  | 0.00579862569912101  |
| DNAH2    | ENSG00000183914 | <b>0,07</b>  | 0.351176377225313    | <b>-0,01</b> | 0.922000568665814    |
| EFR3B    | ENSG00000084710 | <b>0,02</b>  | 0.759925503857163    | <b>0,48</b>  | 1.3867541100746e-12  |
| ERBB3    | ENSG00000065361 | <b>-0,41</b> | 4.66347012065983e-09 | <b>-0,40</b> | 1.01911321543803e-08 |
| FAS      | ENSG00000026103 | <b>-0,50</b> | 2.27089514974497e-13 | <b>-0,36</b> | 4.30367878444592e-07 |
| FUT2     | ENSG00000176920 | <b>-0,27</b> | 0.000126582547127163 | <b>-0,18</b> | 0.0144822715570176   |
| GAB3     | ENSG00000160219 | <b>-0,47</b> | 1.01165428250934e-11 | <b>-0,26</b> | 0.000299826984314779 |
| GAD1     | ENSG00000128683 | <b>0,21</b>  | 0.00338564626367873  | <b>-0,08</b> | 0.290607828725846    |
| GAD2     | ENSG00000136750 | <b>-0,02</b> | 0.782751450965247    | <b>0,59</b>  | 1.42128854896397e-19 |
| GLIS3    | ENSG00000107249 | <b>-0,43</b> | 7.7232688984128e-10  | <b>-0,01</b> | 0.941217812240755    |
| GPR183   | ENSG00000169508 | <b>-0,46</b> | 2.32200603802395e-11 | <b>-0,26</b> | 0.000340431078890772 |
| GZMB     | ENSG00000100453 | <b>-0,07</b> | 0.351670093339684    | <b>-0,15</b> | 0.0340925504782046   |
| HERC2    | ENSG00000128731 | <b>0,35</b>  | 5.47413316301011e-07 | <b>0,50</b>  | 1.2075714468256e-13  |



|          |                 |              |                      |              |                      |
|----------|-----------------|--------------|----------------------|--------------|----------------------|
| HLA-A    | ENSG00000206503 | <b>0,41</b>  | 3.17676782898581e-09 | <b>0,05</b>  | 0.501993587554691    |
| HLA-B    | ENSG00000234745 | <b>-0,07</b> | 0.321245752822301    | <b>-0,37</b> | 1.35154815601213e-07 |
| HLA-C    | ENSG00000204525 | <b>0,22</b>  | 0.00177092256548731  | <b>-0,05</b> | 0.493859111819826    |
| HLA-DMA  | ENSG00000204257 | <b>-0,37</b> | 1.97327915790382e-07 | <b>-0,16</b> | 0.0257260865572971   |
| HLA-DMB  | ENSG00000242574 | <b>-0,23</b> | 0.00118730016677934  | <b>0,06</b>  | 0.39164006739694     |
| HLA-DOA  | ENSG00000204252 | <b>-0,25</b> | 0.000496014501624067 | <b>-0,09</b> | 0.200546981205146    |
| HLA-DOB  | ENSG00000241106 | <b>-0,09</b> | 0.221712768925515    | <b>-0,27</b> | 0.000127220766912069 |
| HLA-DPA1 | ENSG00000231389 | <b>-0,33</b> | 3.48390737616717e-06 | <b>-0,14</b> | 0.0625700888034012   |
| HLA-DPB1 | ENSG00000223865 | <b>-0,14</b> | 0.0500989017843944   | <b>-0,29</b> | 6.04620119758697e-05 |
| HLA-DQA1 | ENSG00000196735 | <b>-0,35</b> | 7.32409952502228e-07 | <b>-0,06</b> | 0.395299635736331    |
| HLA-DQB1 | ENSG00000179344 | <b>-0,16</b> | 0.0281057297508137   | <b>-0,09</b> | 0.220240452128911    |
| HLA-DRA  | ENSG00000204287 | <b>-0,49</b> | 9.0078408324313e-13  | <b>-0,17</b> | 0.0198061579232227   |
| HLA-DRB1 | ENSG00000196126 | <b>-0,34</b> | 1.84758362592658e-06 | <b>-0,14</b> | 0.0539708285037983   |
| HLA-DRB5 | ENSG00000198502 | <b>-0,22</b> | 0.00268285198387145  | <b>-0,11</b> | 0.127383172104309    |
| HLA-E    | ENSG00000204592 | <b>0,16</b>  | 0.0291932833068203   | <b>-0,28</b> | 9.86111154029346e-05 |
| HLA-F    | ENSG00000204642 | <b>0,48</b>  | 3.0844601875437e-12  | <b>-0,25</b> | 0.000591139503654884 |
| HLA-G    | ENSG00000204632 | <b>0,05</b>  | 0.482261735708689    | <b>-0,31</b> | 9.9969053922563e-06  |
| HSPD1    | ENSG00000144381 | <b>-0,42</b> | 1.51101497137221e-09 | <b>-0,03</b> | 0.70674992640563     |
| HTRA1    | ENSG00000166033 | <b>-0,16</b> | 0.0253226996570963   | <b>0,02</b>  | 0.779682250737062    |
| ICA1     | ENSG00000003147 | <b>-0,29</b> | 4.03360945480688e-05 | <b>0,29</b>  | 3.52722991124353e-05 |
| IFIH1    | ENSG00000115267 | <b>-0,35</b> | 4.95295621421065e-07 | <b>0,19</b>  | 0.0080246166595001   |
| IKZF1    | ENSG00000185811 | <b>-0,32</b> | 5.98788332420838e-06 | <b>-0,15</b> | 0.0327310047413403   |
| IL10     | ENSG00000136634 | <b>-0,35</b> | 6.62961598191475e-07 | <b>-0,14</b> | 0.0481751827565998   |
| IL18RAP  | ENSG00000115607 | <b>0,03</b>  | 0.73091966474103     | <b>-0,32</b> | 6.22477610834922e-06 |
| IL7R     | ENSG00000168685 | <b>-0,39</b> | 2.05832329971e-08    | <b>-0,28</b> | 9.30815288694941e-05 |
| INS      | ENSG00000254647 | <b>0,76</b>  | 3.28813327984766e-37 | <b>0,11</b>  | 0.143142992730977    |
| KIF5A    | ENSG00000155980 | <b>0,19</b>  | 0.00743295799022492  | <b>0,49</b>  | 6.39098027833842e-13 |
| LMO7     | ENSG00000136153 | <b>-0,49</b> | 7.63282012964022e-13 | <b>-0,33</b> | 3.60720299743556e-06 |
| LTA      | ENSG00000226979 | <b>0,11</b>  | 0.115156450378494    | <b>-0,07</b> | 0.32644901266702     |
| ORMDL3   | ENSG00000172057 | <b>-0,47</b> | 1.19126018897978e-11 | <b>0,07</b>  | 0.365520401099593    |
| PDXDC2P  | ENSG00000196696 | <b>0,26</b>  | 0.000215554292578816 | <b>-0,12</b> | 0.105482149605217    |
| PGM1     | ENSG00000079739 | <b>-0,57</b> | 1.41755522166158e-17 | <b>-0,22</b> | 0.00199817992063461  |
| PRF1     | ENSG00000180644 | <b>-0,06</b> | 0.431743056382847    | <b>-0,15</b> | 0.0436730463269114   |
| PRKCQ    | ENSG00000065675 | <b>-0,39</b> | 2.69572524203856e-08 | <b>0,08</b>  | 0.283721721238615    |
| PRKD2    | ENSG00000105287 | <b>0,50</b>  | 2.89331396118485e-13 | <b>-0,16</b> | 0.0241652482815126   |
| PTPN2    | ENSG00000175354 | <b>-0,40</b> | 8.0158053878309e-09  | <b>-0,56</b> | 7.30794410228303e-17 |
| PTPN22   | ENSG00000134242 | <b>-0,18</b> | 0.011600198237508    | <b>-0,37</b> | 1.18438543700136e-07 |
| RASGRP1  | ENSG00000172575 | <b>-0,12</b> | 0.11219567877165     | <b>0,44</b>  | 1.24364310748378e-10 |
| RGS1     | ENSG00000090104 | <b>-0,33</b> | 2.57457538343008e-06 | <b>-0,20</b> | 0.00445367226257139  |
| RNLS     | ENSG00000184719 | <b>-0,05</b> | 0.529740880572392    | <b>0,37</b>  | 1.4417227790833e-07  |
| SH2B3    | ENSG00000111252 | <b>-0,10</b> | 0.151496947280661    | <b>-0,12</b> | 0.0978361182552971   |
| SKAP2    | ENSG00000005020 | <b>-0,40</b> | 1.14193591355129e-08 | <b>0,03</b>  | 0.650588172482157    |
| SMARCE1  | ENSG00000073584 | <b>-0,44</b> | 1.43919275793419e-10 | <b>-0,01</b> | 0.848390842436457    |
| STAT4    | ENSG00000138378 | <b>-0,02</b> | 0.759118455330614    | <b>0,47</b>  | 5.63943268292532e-12 |
| TAGAP    | ENSG00000164691 | <b>0,12</b>  | 0.0887068974190489   | <b>0,05</b>  | 0.456841402755305    |
| TNFAIP3  | ENSG00000118503 | <b>-0,35</b> | 5.59862265015102e-07 | <b>-0,54</b> | 1.00186587810008e-15 |

|       |                 |              |                      |              |                      |
|-------|-----------------|--------------|----------------------|--------------|----------------------|
| TRIB2 | ENSG00000071575 | <b>-0,32</b> | 5.05930330302539e-06 | <b>-0,48</b> | 1.89950400634015e-12 |
| TYK2  | ENSG00000105397 | <b>0,65</b>  | 1.55184202437123e-24 | <b>-0,02</b> | 0.769230270167196    |

Table S3B

**MAFA and MAFB co-expression correlations with T2D risk genes**

| Genename | GeneID          | MAFA_GC      | P-value              | MAFB_GC      | P-value              |
|----------|-----------------|--------------|----------------------|--------------|----------------------|
| ABCC8    | ENSG00000006071 | <b>0,34</b>  | 2.10330211688118e-06 | <b>0,52</b>  | 1.28120588155402e-14 |
| AKT1     | ENSG00000142208 | <b>0,49</b>  | 4.07315761278472e-13 | <b>-0,12</b> | 0.0868735039250571   |
| CACNA1A  | ENSG00000141837 | <b>0,53</b>  | 2.21979789340497e-15 | <b>0,53</b>  | 3.57238187784291e-15 |
| CACNA1B  | ENSG00000148408 | <b>0,54</b>  | 1.07236808674557e-15 | <b>0,66</b>  | 2.63860159496157e-25 |
| CACNA1C  | ENSG00000151067 | <b>0,57</b>  | 1.57338173452952e-17 | <b>0,67</b>  | 9.46345928324057e-26 |
| CACNA1D  | ENSG00000157388 | <b>0,18</b>  | 0.0122445950182052   | <b>0,63</b>  | 8.11006635367094e-23 |
| CACNA1E  | ENSG00000198216 | <b>0,01</b>  | 0.93856452391617     | <b>0,08</b>  | 0.250165259195648    |
| CACNA1G  | ENSG00000006283 | <b>0,38</b>  | 6.84829917772518e-08 | <b>0,06</b>  | 0.434378301917194    |
| GCK      | ENSG00000106633 | <b>0,53</b>  | 1.89645691952229e-15 | <b>0,60</b>  | 5.34597962445488e-20 |
| GK       | ENSG00000198814 | <b>-0,50</b> | 1.19986437672528e-13 | <b>-0,38</b> | 7.10036125634837e-08 |
| HK1      | ENSG00000156515 | <b>-0,54</b> | 7.22041621322333e-16 | <b>-0,43</b> | 5.44184526502941e-10 |
| HK2      | ENSG00000159399 | <b>-0,41</b> | 2.78000065516091e-09 | <b>-0,44</b> | 1.23066696173455e-10 |
| HK3      | ENSG00000160883 | <b>0,26</b>  | 0.000282823401822961 | <b>0,06</b>  | 0.383923684604543    |
| HKDC1    | ENSG00000156510 | <b>-0,36</b> | 4.25541914830772e-07 | <b>-0,30</b> | 2.05393658114493e-05 |
| HNF1A    | ENSG00000135100 | <b>0,70</b>  | 1.95754813519648e-29 | <b>0,14</b>  | 0.0475722317693501   |
| HNF4A    | ENSG00000101076 | <b>-0,39</b> | 1.68266598161732e-08 | <b>-0,14</b> | 0.0470842022213394   |
| IKBKB    | ENSG00000104365 | <b>0,00</b>  | 0.955333101431861    | <b>-0,29</b> | 6.32388919004456e-05 |
| INS      | ENSG00000254647 | <b>0,76</b>  | 3.28813327984766e-37 | <b>0,11</b>  | 0.143142992730977    |
| INS-IGF2 | ENSG00000129965 | <b>0,76</b>  | 7.81247683954942e-37 | <b>0,11</b>  | 0.145621556236361    |
| INSR     | ENSG00000171105 | <b>-0,42</b> | 1.88076124507707e-09 | <b>-0,13</b> | 0.0798184039304975   |
| IRS1     | ENSG00000169047 | <b>0,19</b>  | 0.00779396677946712  | <b>-0,36</b> | 2.89957043440865e-07 |
| IRS2     | ENSG00000185950 | <b>0,26</b>  | 0.000226329855985828 | <b>0,23</b>  | 0.00164737210953704  |
| ISL1     | ENSG0000016082  | <b>0,42</b>  | 1.31545971999211e-09 | <b>0,61</b>  | 9.49887396196788e-21 |
| KCNJ11   | ENSG00000187486 | <b>0,86</b>  | 2.54594666859907e-58 | <b>0,55</b>  | 1.3208698915733e-16  |
| MAFA     | ENSG00000182759 | <b>1,00</b>  |                      | <b>0,45</b>  | 1.05379019767395e-10 |
| MAPK1    | ENSG00000100030 | <b>-0,60</b> | 2.99200936810869e-20 | <b>0,08</b>  | 0.251282465884628    |
| MAPK10   | ENSG00000109339 | <b>0,00</b>  | 0.962978066789964    | <b>0,63</b>  | 1.24976684735071e-22 |
| MAPK3    | ENSG00000102882 | <b>0,36</b>  | 2.87917061872028e-07 | <b>0,30</b>  | 2.0009180219269e-05  |
| MAPK8    | ENSG00000107643 | <b>-0,56</b> | 2.23804290203971e-17 | <b>-0,30</b> | 1.96903338705634e-05 |
| MAPK9    | ENSG00000050748 | <b>-0,46</b> | 1.64214884535091e-11 | <b>0,20</b>  | 0.00516805948761377  |
| MTOR     | ENSG00000198793 | <b>-0,46</b> | 1.39801399115379e-11 | <b>0,03</b>  | 0.700528947537056    |
| NEUROD1  | ENSG00000162992 | <b>0,23</b>  | 0.00134494789150507  | <b>0,79</b>  | 3.00215374064025e-41 |
| PDX1     | ENSG00000139515 | <b>0,55</b>  | 1.23217107593688e-16 | <b>0,77</b>  | 8.16286586695198e-39 |
| PHKA2    | ENSG00000044446 | <b>0,28</b>  | 6.63900708979025e-05 | <b>0,15</b>  | 0.0373743719227656   |
| PIK3C2A  | ENSG00000011405 | <b>-0,50</b> | 2.01148983364103e-13 | <b>0,03</b>  | 0.678424233701642    |
| PIK3CA   | ENSG00000121879 | <b>-0,67</b> | 2.39529234700326e-26 | <b>-0,17</b> | 0.0210010819676031   |
| PIK3CB   | ENSG00000051382 | <b>-0,63</b> | 4.05405996223875e-22 | <b>-0,20</b> | 0.00456660588519594  |
| PIK3CD   | ENSG00000171608 | <b>0,29</b>  | 5.85616427793295e-05 | <b>-0,34</b> | 1.86148637990212e-06 |
| PIK3CG   | ENSG00000105851 | <b>-0,23</b> | 0.00110467851680458  | <b>0,09</b>  | 0.192800970725085    |
| PIK3R1   | ENSG00000145675 | <b>-0,70</b> | 4.94075866857068e-29 | <b>-0,09</b> | 0.19404408185396     |
| PIK3R2   | ENSG00000105647 | <b>0,77</b>  | 6.52792398222713e-39 | <b>0,42</b>  | 2.10515977066689e-09 |
| PIK3R3   | ENSG00000117461 | <b>-0,05</b> | 0.526593151012579    | <b>0,55</b>  | 1.10202969066579e-16 |
| PIK3R5   | ENSG00000141506 | <b>-0,26</b> | 0.00030486410290903  | <b>-0,22</b> | 0.00229483366082675  |
| PKM      | ENSG00000067225 | <b>-0,52</b> | 8.07020188765281e-15 | <b>-0,03</b> | 0.718055024131205    |
| PRKCD    | ENSG00000163932 | <b>-0,35</b> | 8.07477316843992e-07 | <b>-0,18</b> | 0.0106597716713838   |
| PRKCE    | ENSG00000171132 | <b>-0,02</b> | 0.807943569172946    | <b>0,52</b>  | 2.2305918745835e-14  |
| PRKCZ    | ENSG00000067606 | <b>0,22</b>  | 0.00276199404735867  | <b>0,11</b>  | 0.116537453902725    |
| SLC2A2   | ENSG00000163581 | <b>-0,14</b> | 0.0494927316336594   | <b>0,41</b>  | 6.18209621481966e-09 |

|        |                 |              |                      |              |                      |
|--------|-----------------|--------------|----------------------|--------------|----------------------|
| SLC2A4 | ENSG00000181856 | <b>-0,08</b> | 0.25024436762474     | <b>-0,23</b> | 0.00116038375283762  |
| SOCS1  | ENSG00000185338 | <b>0,62</b>  | 1.13362876375065e-21 | <b>-0,11</b> | 0.135148843402378    |
| SOCS2  | ENSG00000120833 | <b>0,17</b>  | 0.0169989833644122   | <b>-0,07</b> | 0.325388859958781    |
| SOCS3  | ENSG00000184557 | <b>0,24</b>  | 0.000917143429051332 | <b>-0,39</b> | 1.89577019821364e-08 |
| SOCS4  | ENSG00000180008 | <b>-0,42</b> | 1.09908953291492e-09 | <b>0,15</b>  | 0.0337534242591804   |
| SURF1  | ENSG00000148290 | <b>0,15</b>  | 0.0402467378878893   | <b>0,04</b>  | 0.543655535640052    |
| TNF    | ENSG00000232810 | <b>-0,17</b> | 0.0219343961824148   | <b>-0,33</b> | 2.27682620675884e-06 |
